# Supplementary material for: Discovery of Novel Biphenyl Carboxylic Acid Derivatives as Potent URAT1 Inhibitors
Source: MDPI journal article supplement (doi:10.3390/molecules28217415), 2023-11-03

## Supplementary Material

### **Discovery of novel biphenyl carboxylic acid derivatives as potent URAT1 inhibitors**

Xianxin Hou, Yongcheng Wang, Yajun Yang and Zhiyan Xiao\*

*Beijing Key Laboratory of Active Substance Discovery and Druggability Evaluation,  
Institute of Materia Medica, Chinese Academy of Medical Sciences and Peking Union  
Medical College, Beijing 100050, China*

\*Correspondence: xiaoz@imm.ac.cn

Spectral data, including HR-ESI-MS,  $^1\text{H}$ -NMR and  $^{13}\text{C}$ -NMR, for the target compounds are provided herein.

## Compound A1:

### HR-ESI-MS:

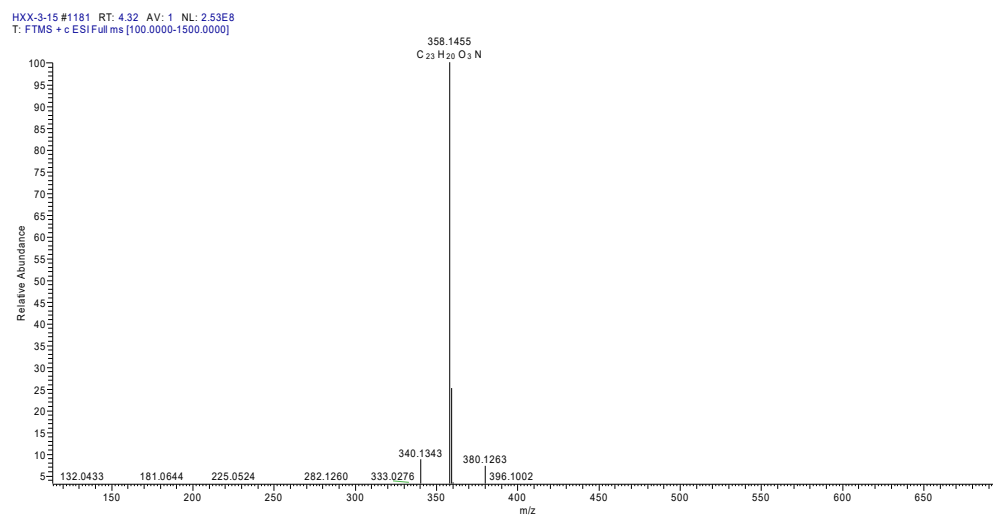

### $^1\text{H}$ -NMR:

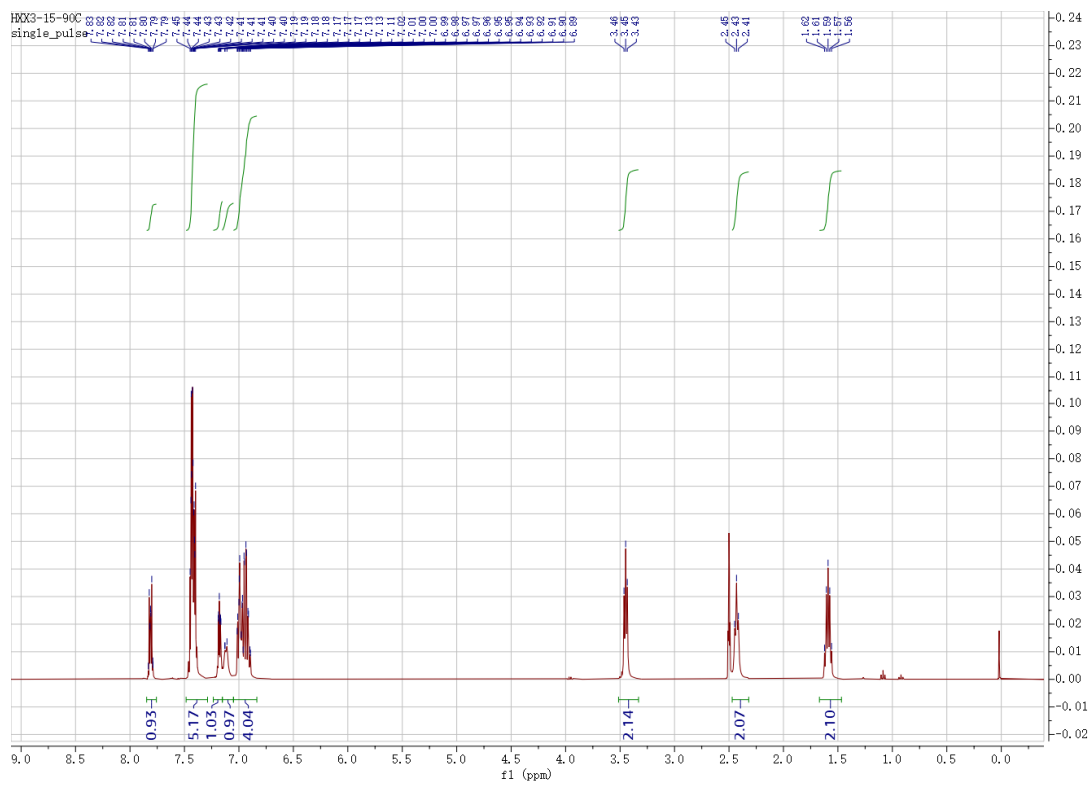

## $^{13}\text{C}$ -NMR:

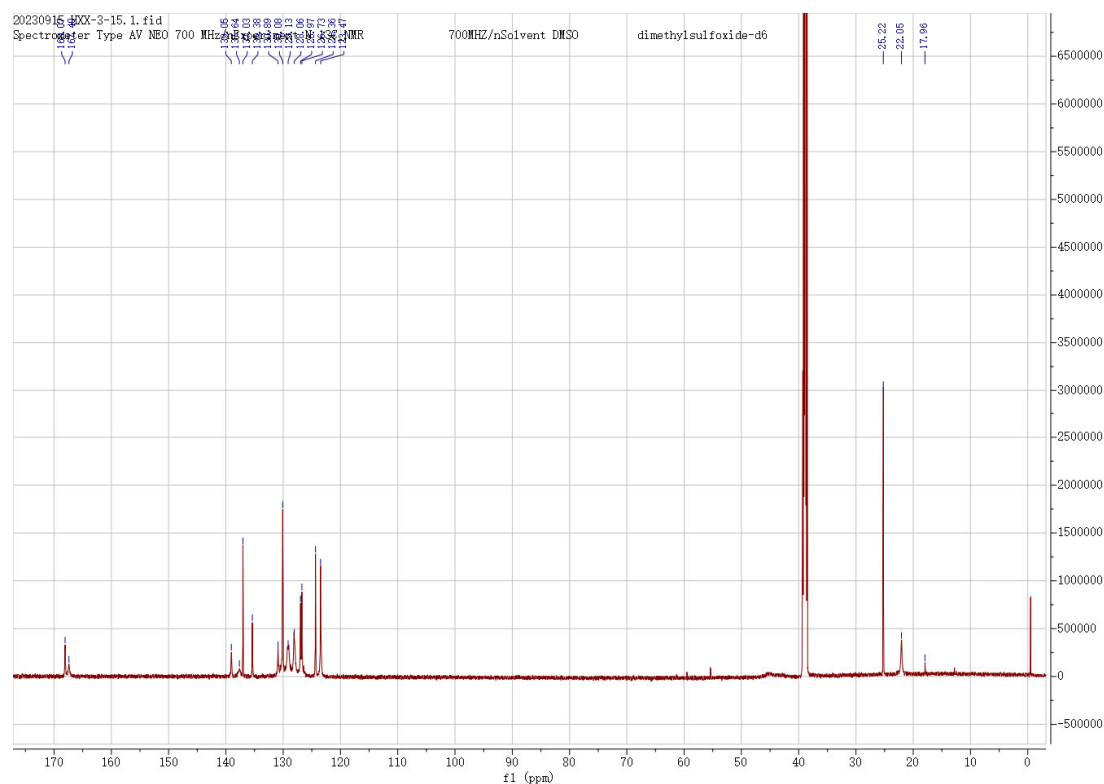

## Compound A2:

### HR-ESI-MS:

HXX-3-20 #1104 RT: 4.10 AV: 1 NL: 6.72E7  
T: FTMS + c ESI Full ms [100.0000-1500.0000]

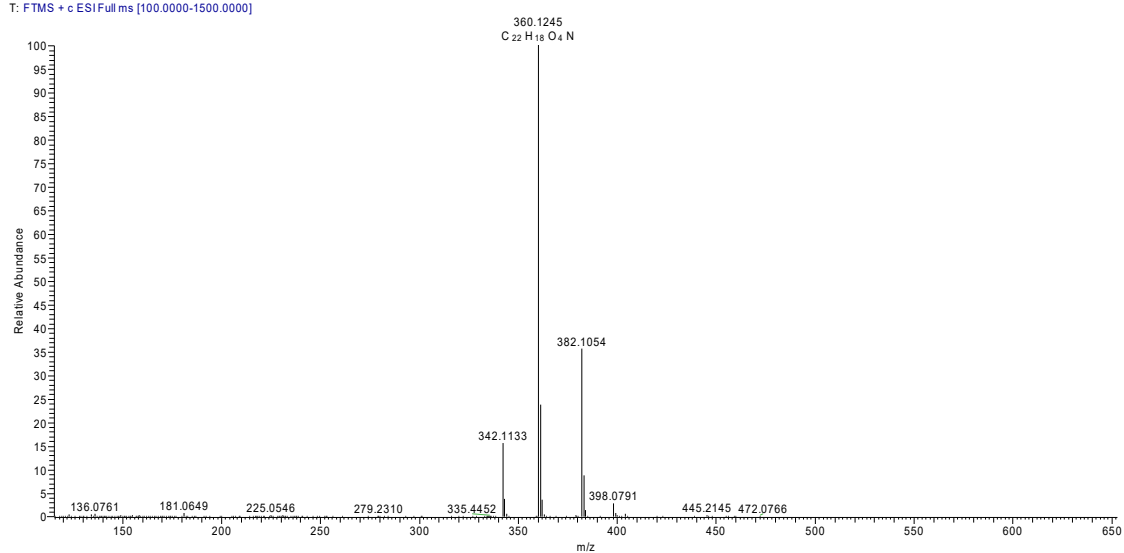

<sup>1</sup>H-NMR: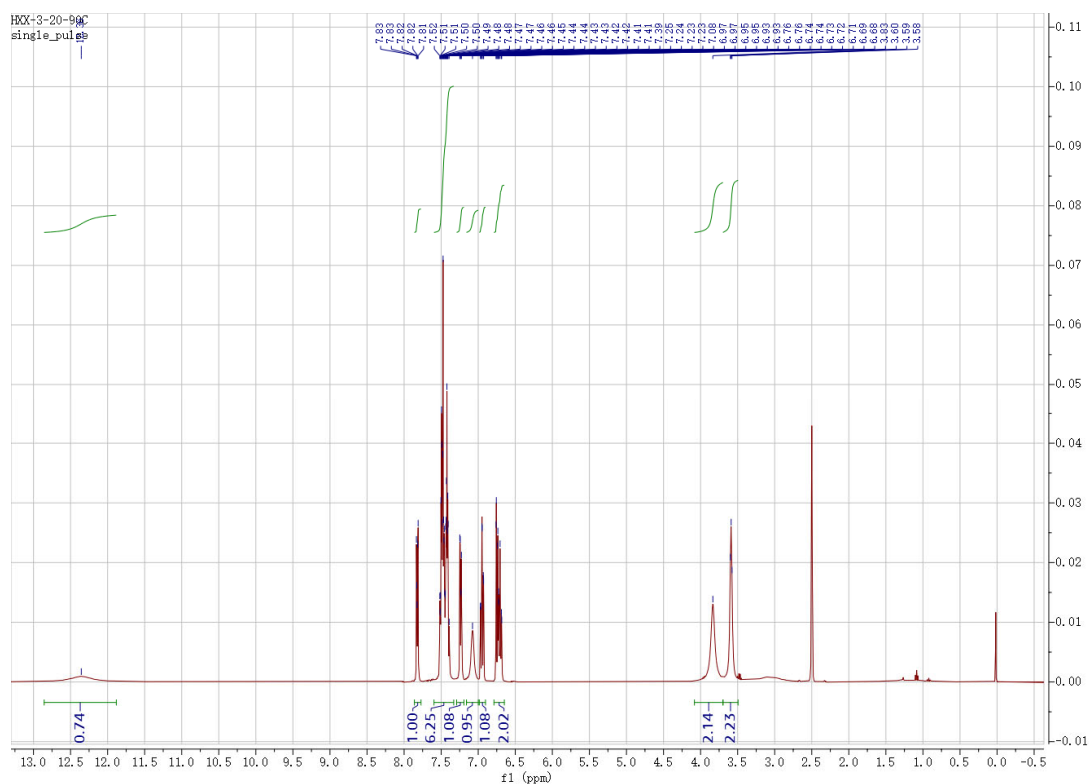

Compound A3:

HR-ESI-MS:

HXX-8-38 #1171 RT: 4.23 AV: 1 NL: 1.74E9  
T: FTMS + c ESI Full ms [100.0000-1500.0000]

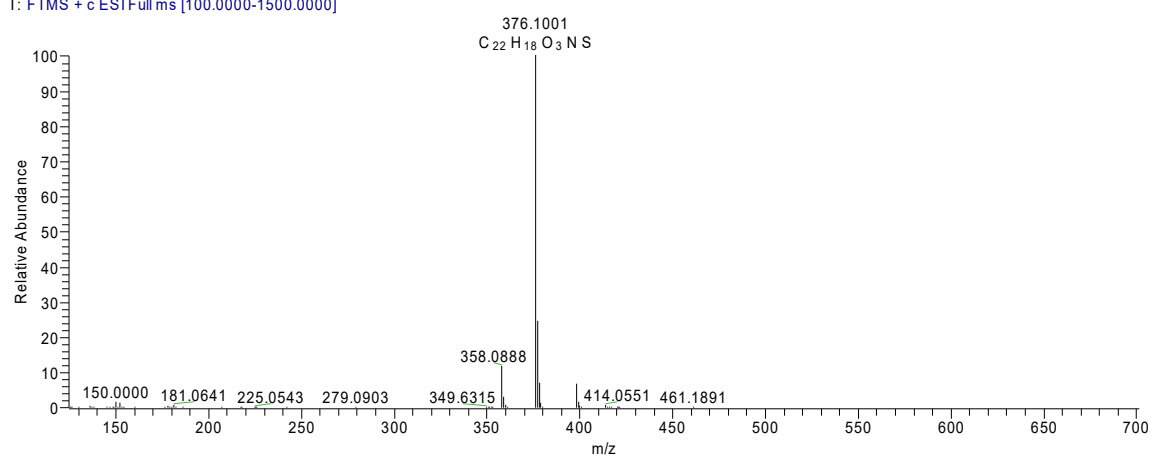



## $^1\text{H}$ -NMR:

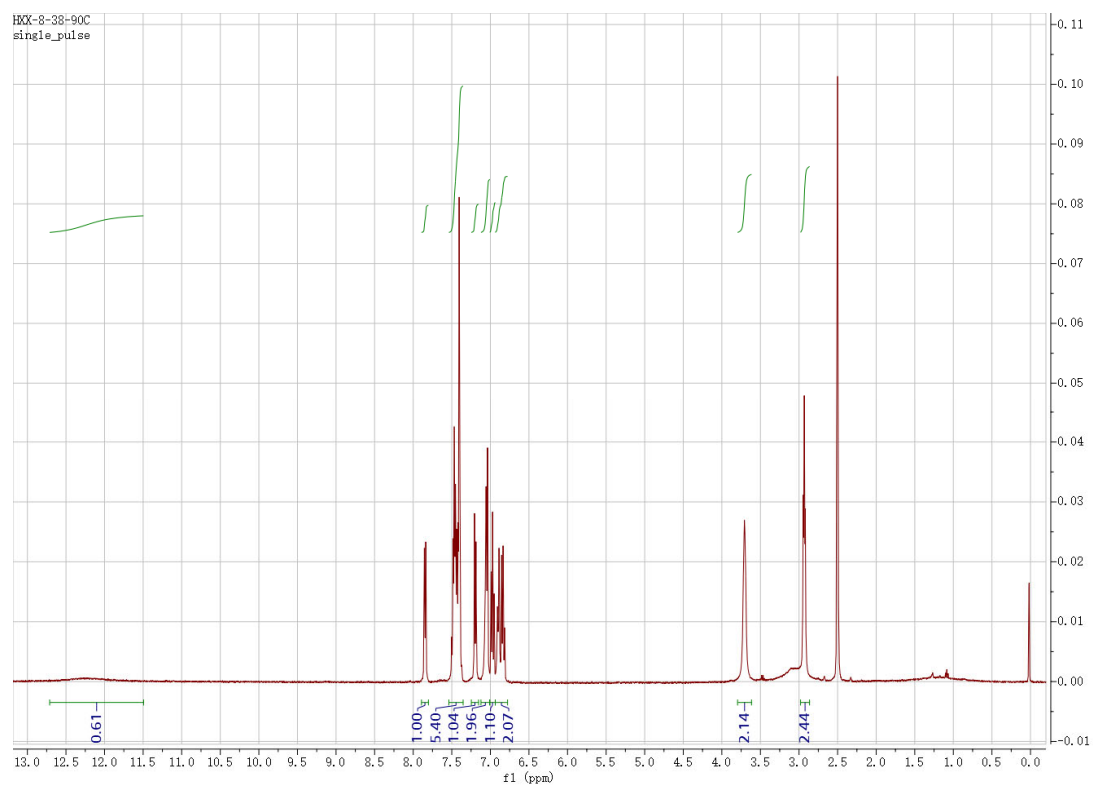

## Compound A4:

## HR-ESI-MS:

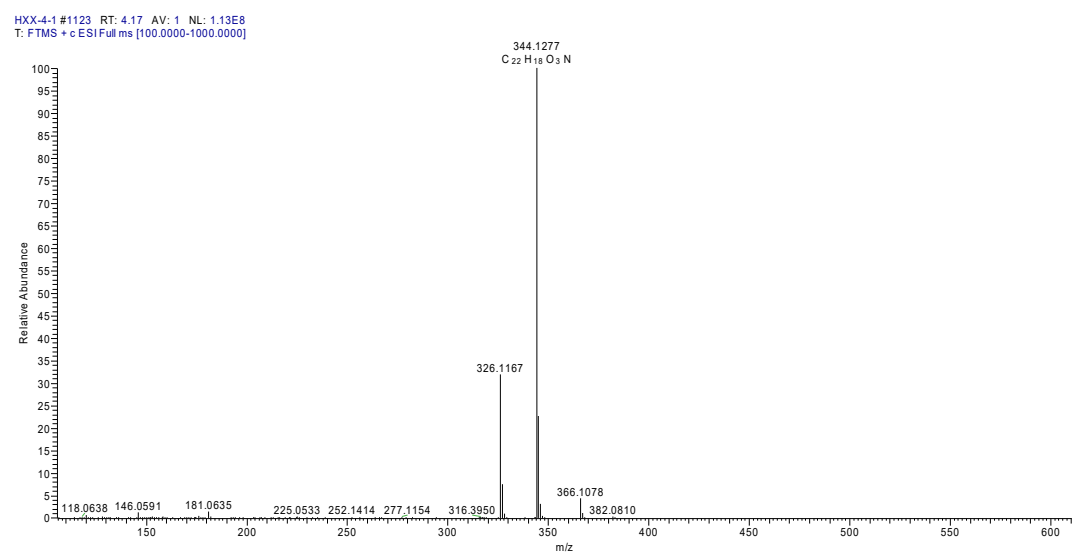

$^1\text{H}$ -NMR:

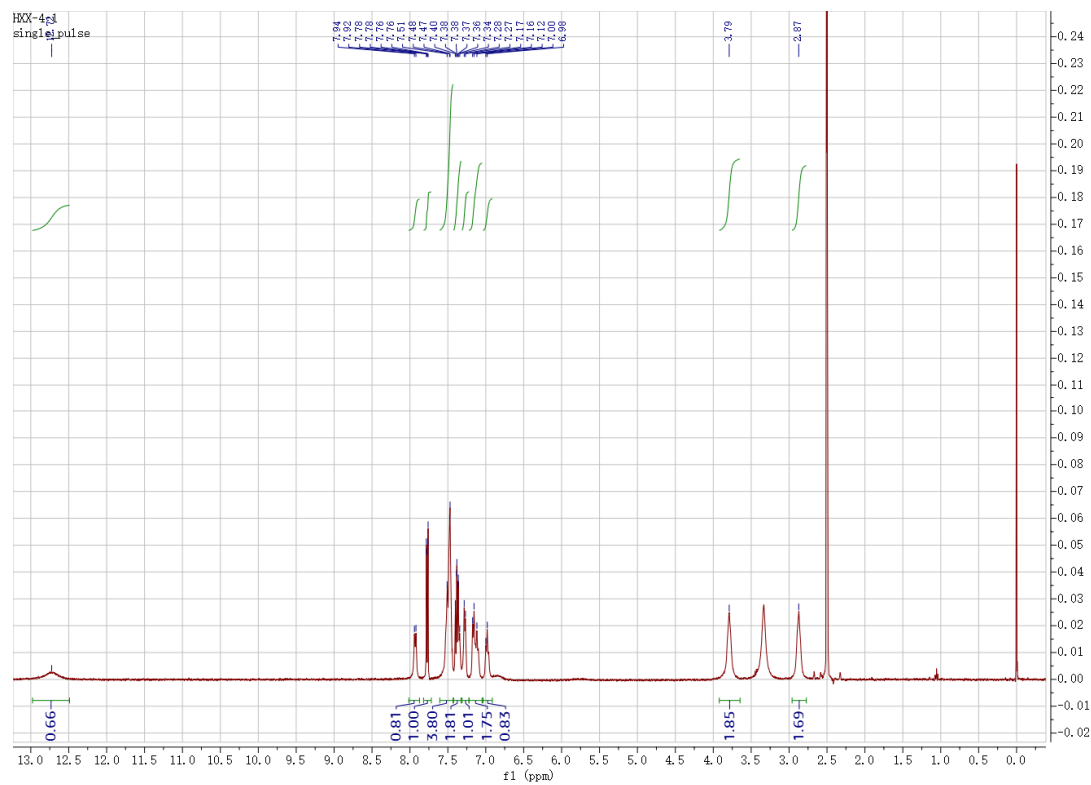

Compound A5:

HR-ESI-MS:

HXX-4-10 #1204 RT: 4.47 AV: 1 NL: 9.53E6  
T: FTMS + c ESI Full ms [100.0000-1000.0000]

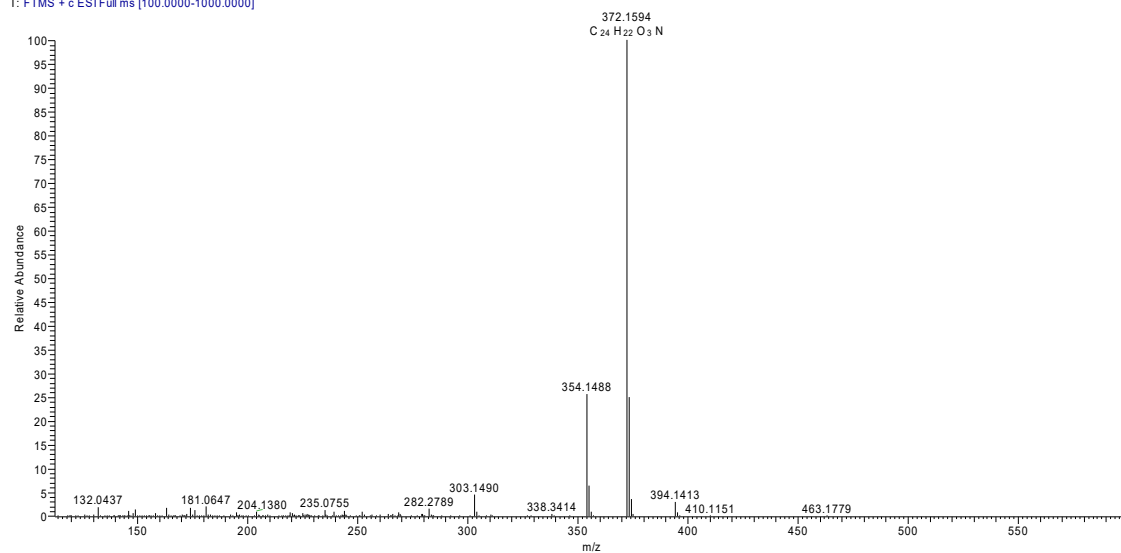

## $^1\text{H}$ -NMR:

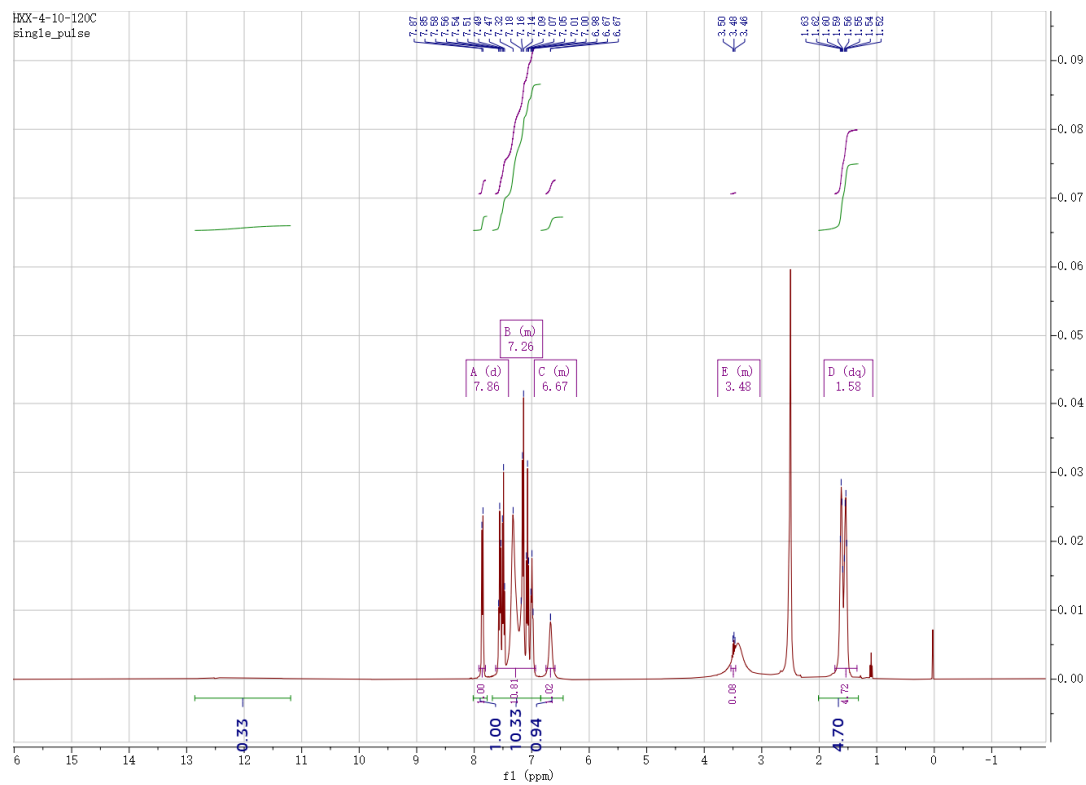

## Compound A6:

## HR-ESI-MS:

HXX-8-13 #1341 RT: 4.54 AV: 1 NL: 1.18E9  
T: FTMS + c ESI Full ms [100.0000-1500.0000]

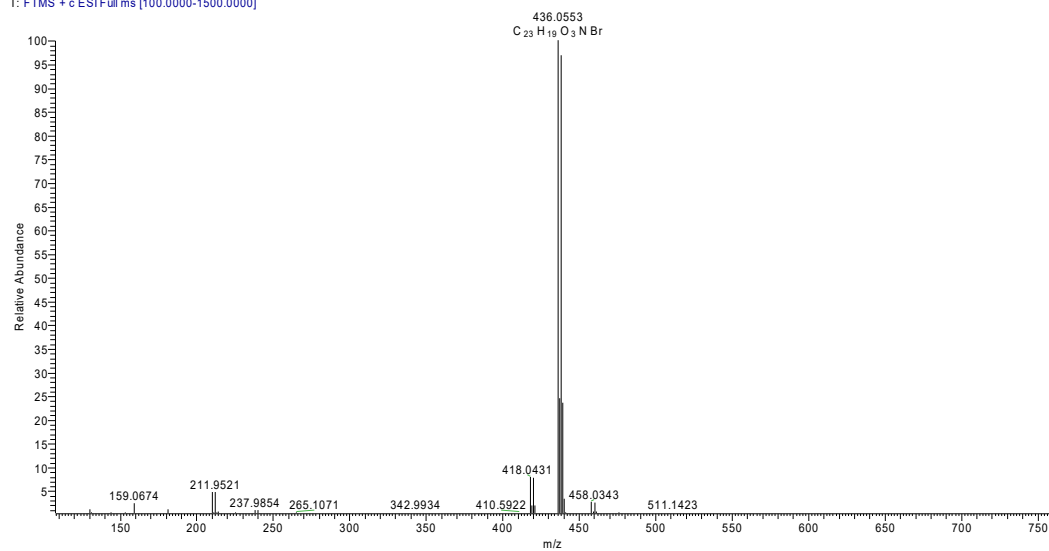

$^1\text{H}$ -NMR:

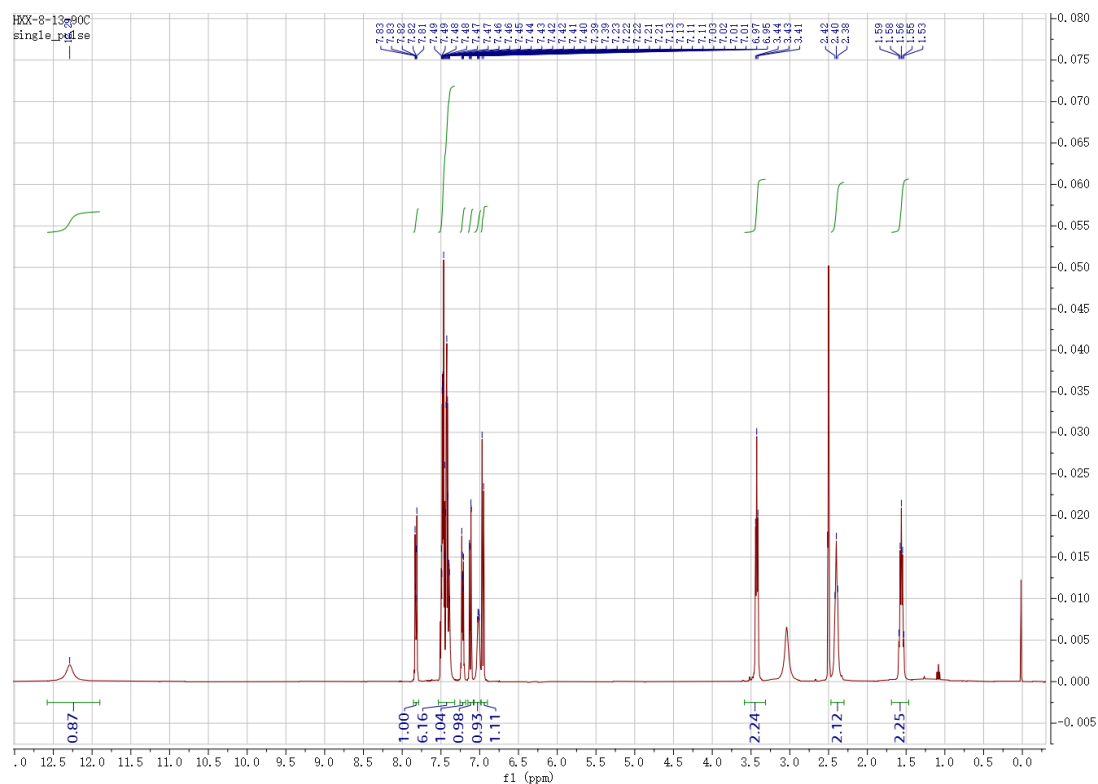

Compound A7:

HR-ESI-MS:

HNX-7-28 210426170200 #1330 RT: 4.59 AV: 1 NL: 4.54E8  
T: FTMS + c ESIFull ms [100.0000-1500.0000]

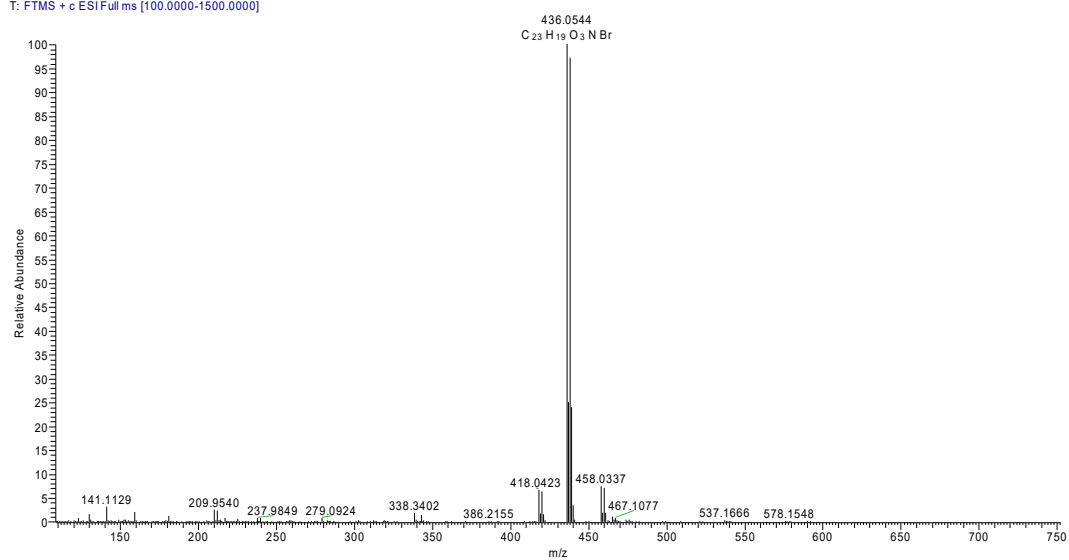

## $^1\text{H}$ -NMR:

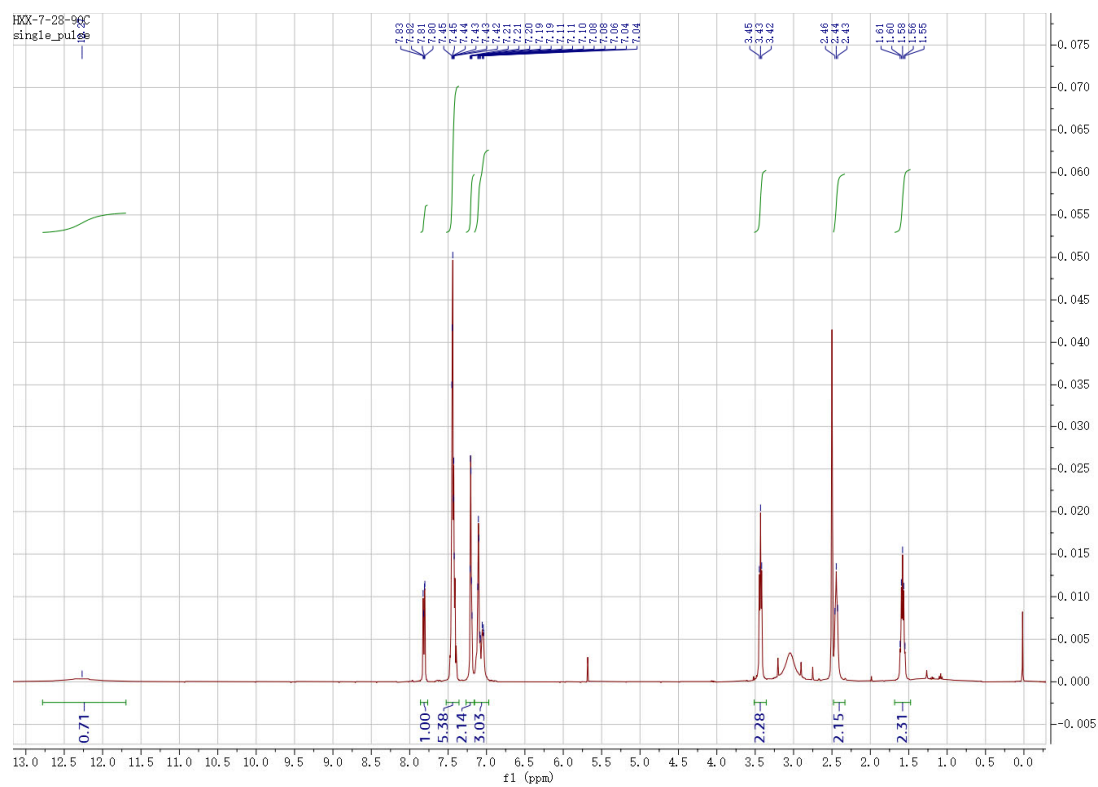

## Compound A8:

## HR-ESI-MS:

HXX-8-21 #1392 RT: 4.58 AV: 1 NL: 1.61E9  
T: FTMS + c ESI Full ms [100.0000-1500.0000]

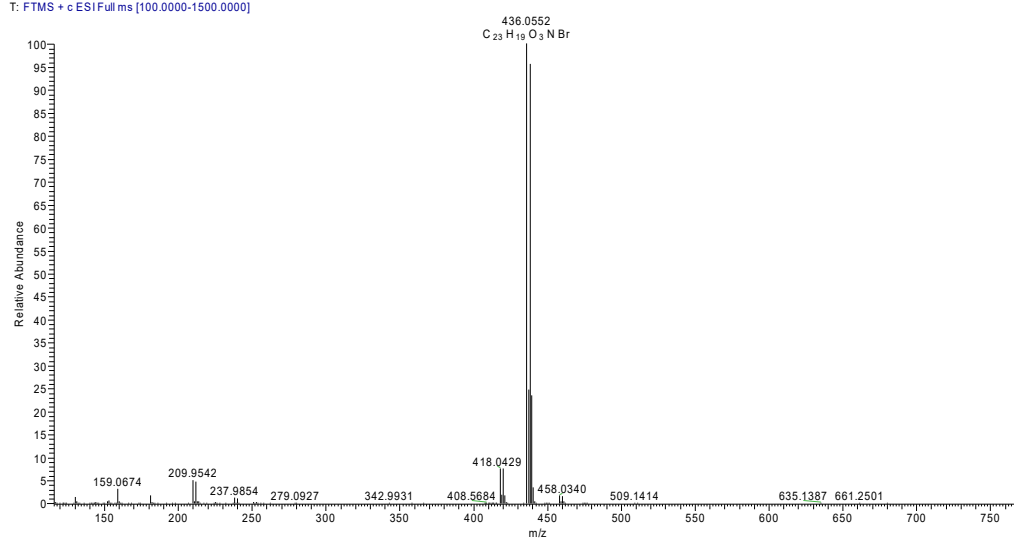

## $^1\text{H}$ -NMR:

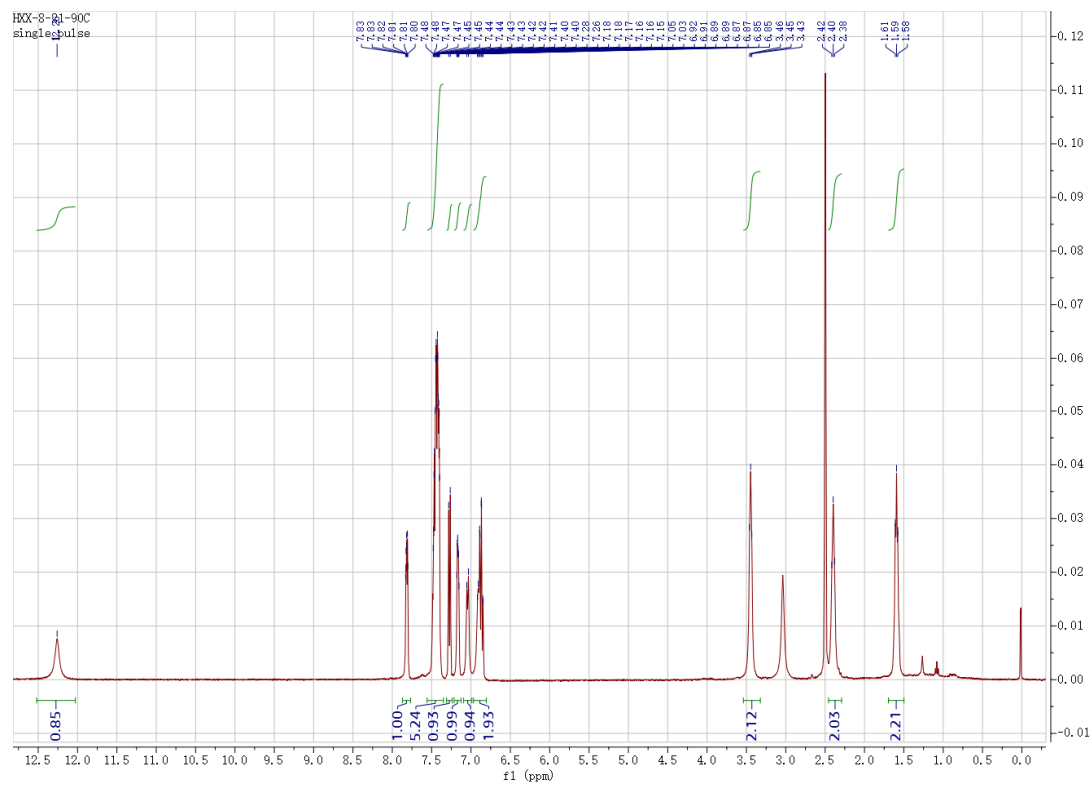

## Compound A9:

### HR-ESI-MS:

HXX-8-12 #52 RT: 0.34 AV: 1 NL: 1.70E7  
T: FTMS + p ESI Full ms [100.0000-1500.0000]

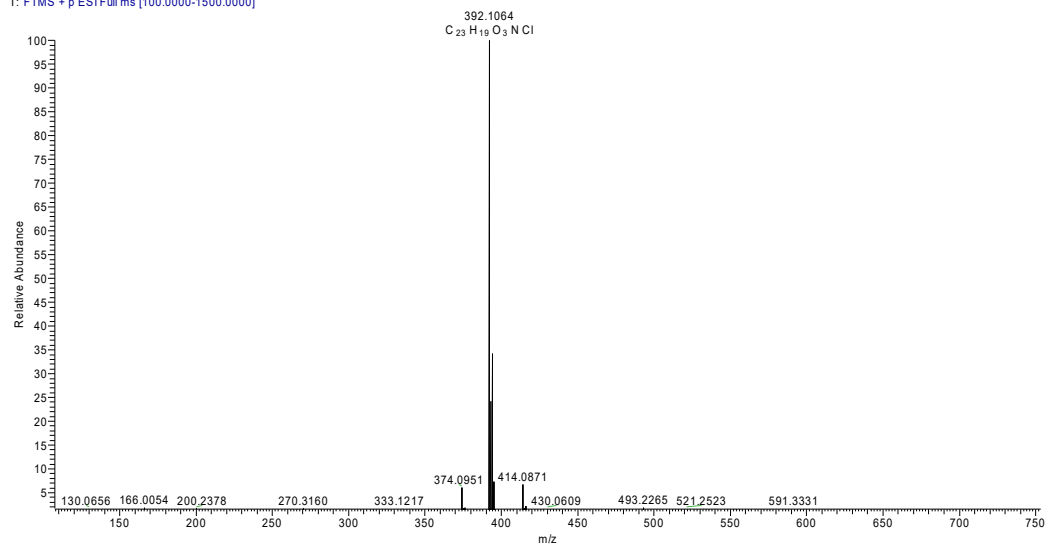

## $^1\text{H}$ -NMR:

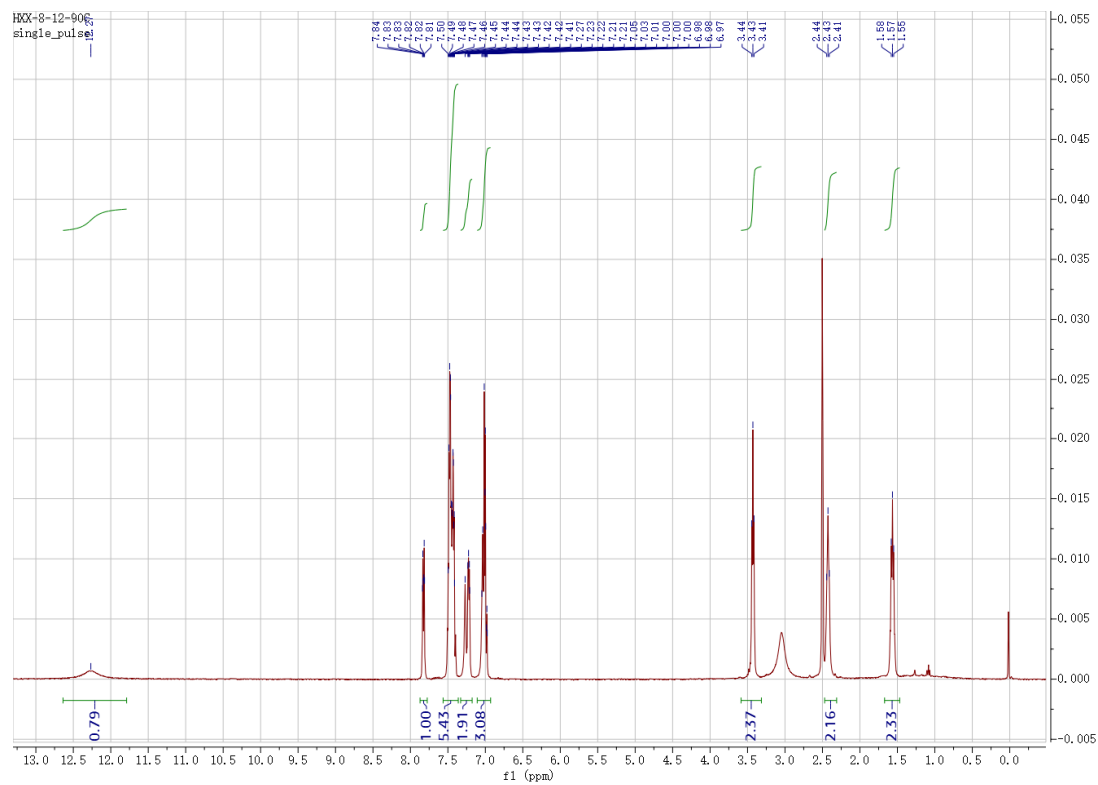

## Compound A10:

### HR-ESI-MS:

HXX-7-30\_210426171036 #1303 RT: 4.18 AV: 1 NL: 4.81E9  
T: FTMS + c ESI Full ms [100.0000-1500.0000]

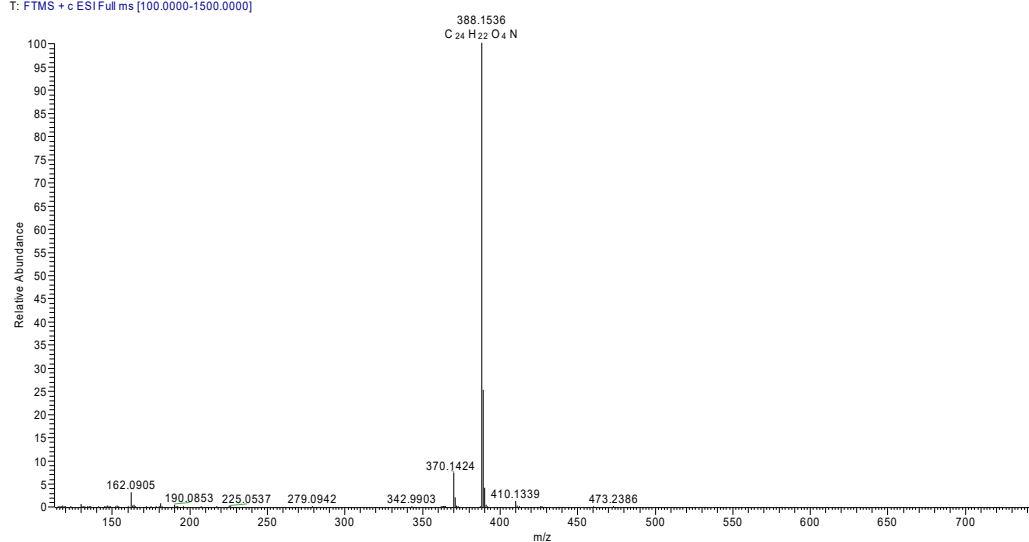

## $^1\text{H}$ -NMR:

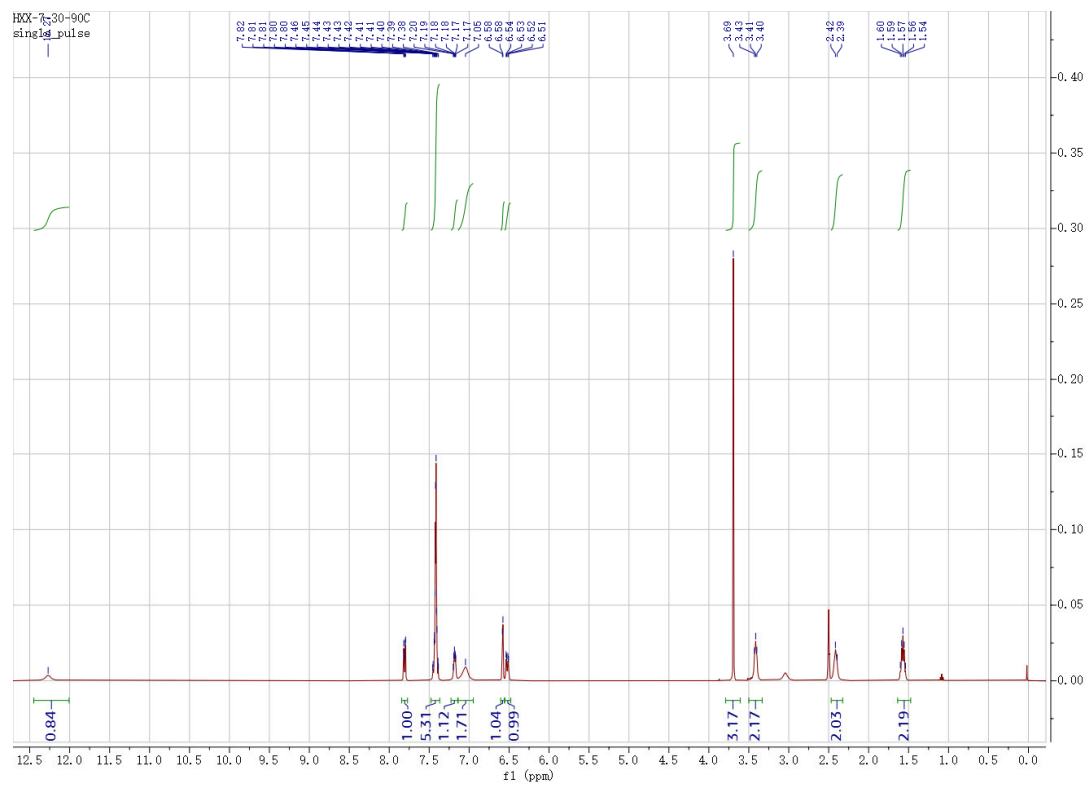

## Compound A11:

## HR-ESI-MS:

HXX-8-26 #1335 RT: 4.46 AV: 1 NL: 2.90E9  
T: FTMS + c ESIFull ms [100.0000-1500.0000]

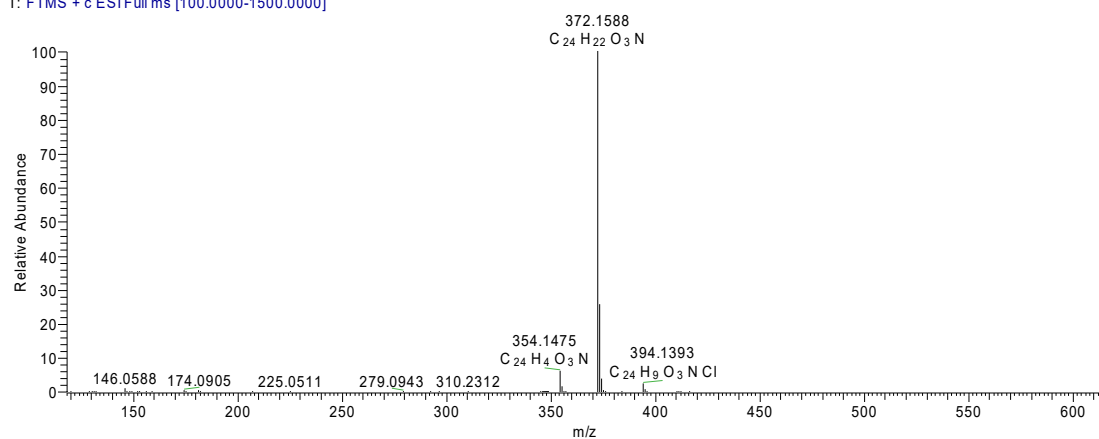



## $^1\text{H}$ -NMR:

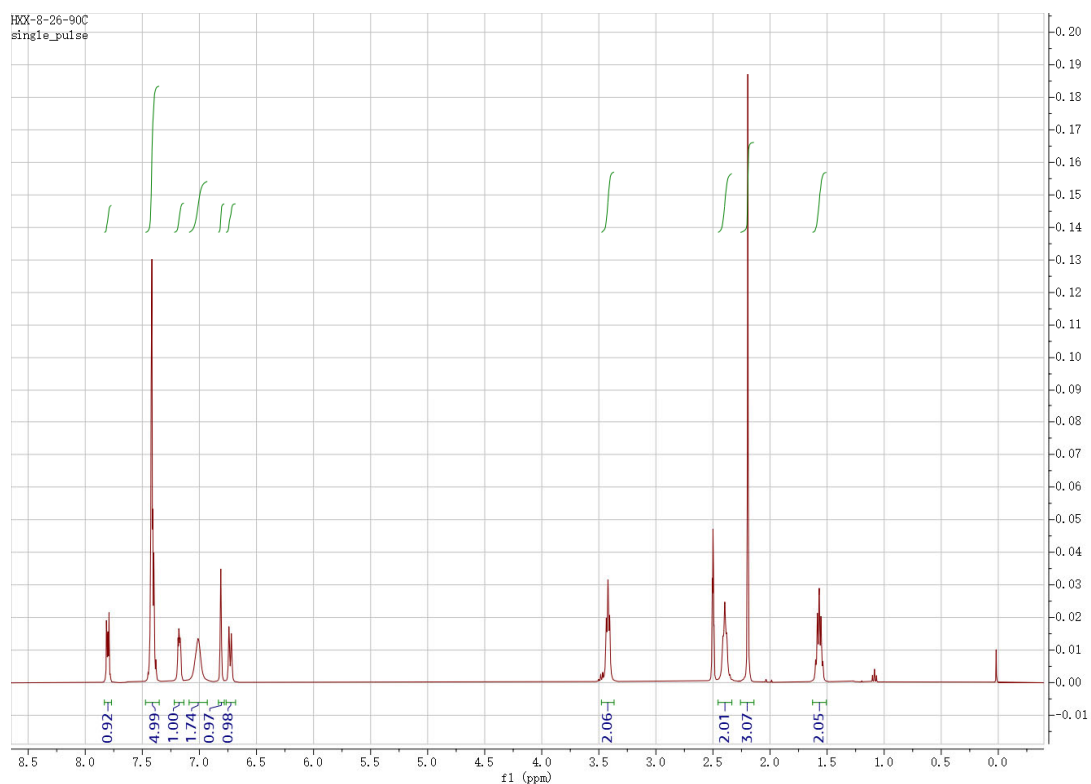

## Compound A12:

## HR-ESI-MS:

HXX-8-28\_210517162059 #1356 RT: 4.87 AV: 1 NL: 1.04E9  
T: FTMS + c ESI Full ms [100.0000-1500.0000]

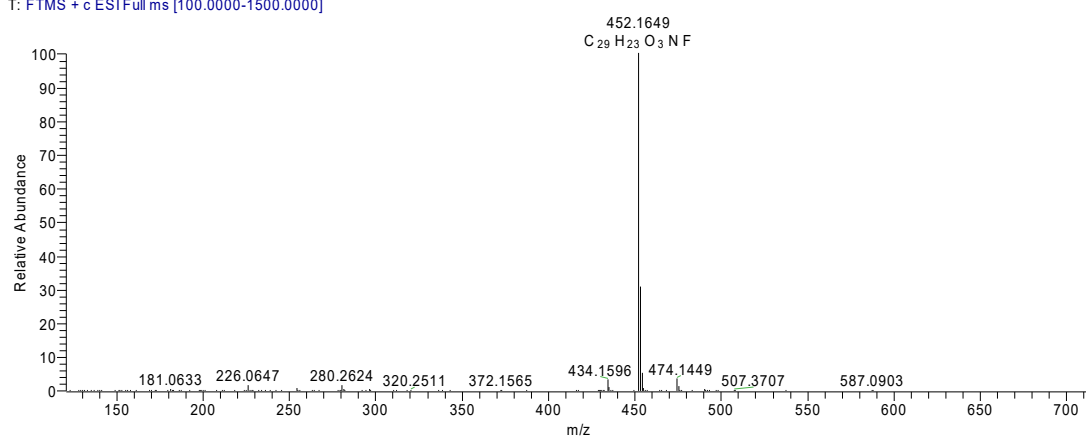

## $^1\text{H}$ -NMR:

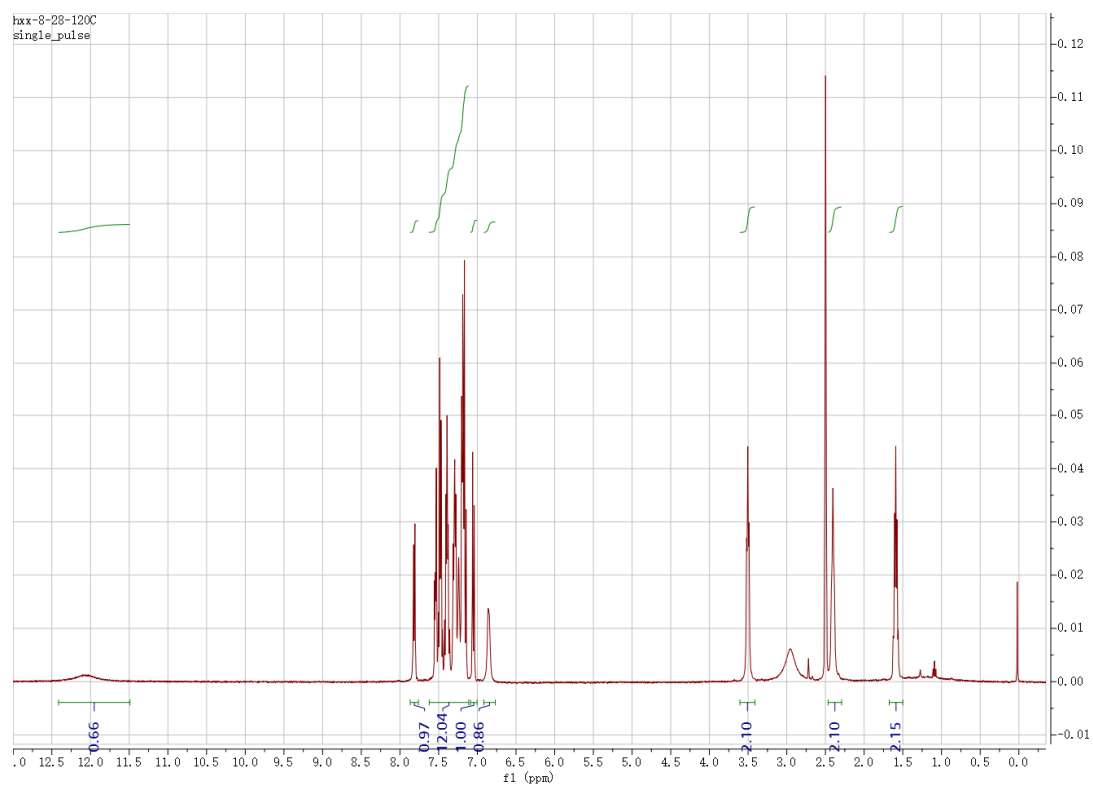

## Compound A13:

### HR-ESI-MS:

HXX-8-33 #848 RT: 3.03 AV: 1 NL: 3.61E9  
T: FTMS + c ESI Full ms [100.0000-1500.0000]

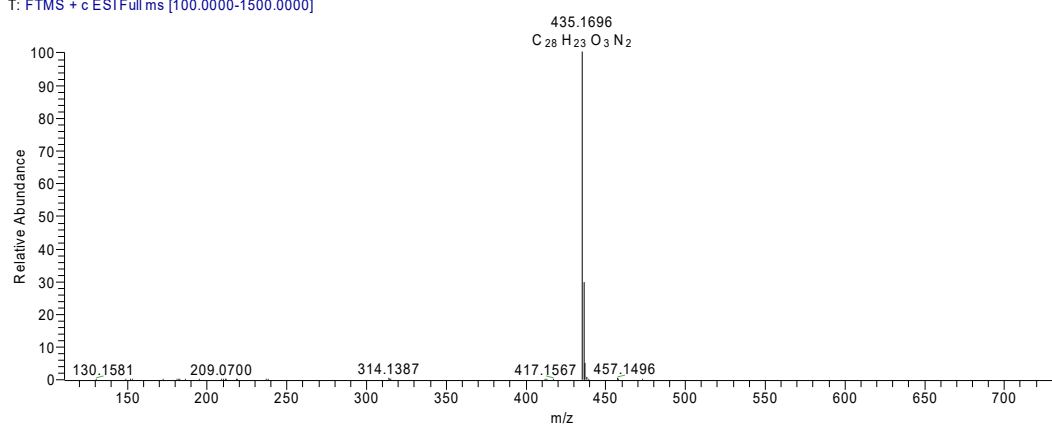

## $^1\text{H}$ -NMR:

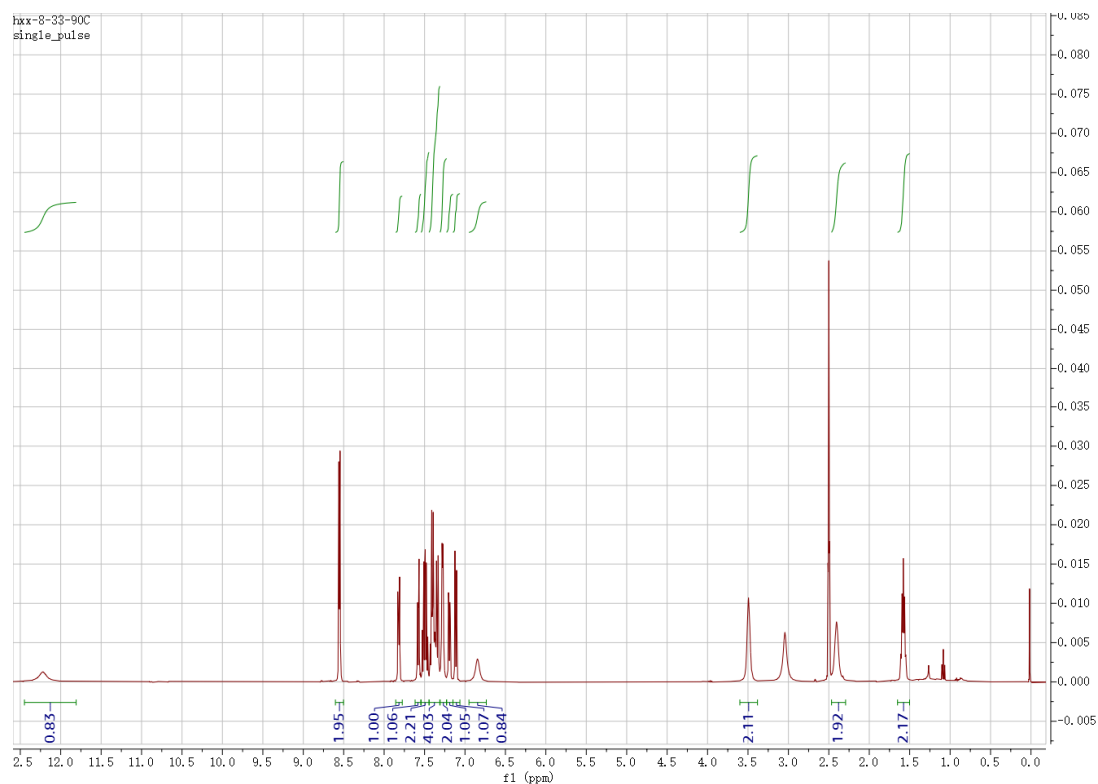

## Compound A14:

### HR-ESI-MS:

HXX-8-35 #1332 RT: 4.80 AV: 1 NL: 1.44E9  
T: FTMS + c ESI Full ms [100.0000-1500.0000]

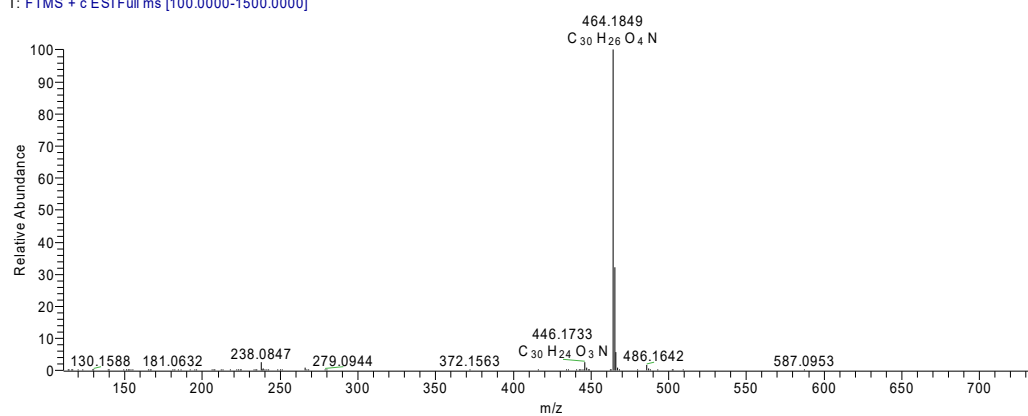

## <sup>1</sup>H-NMR:

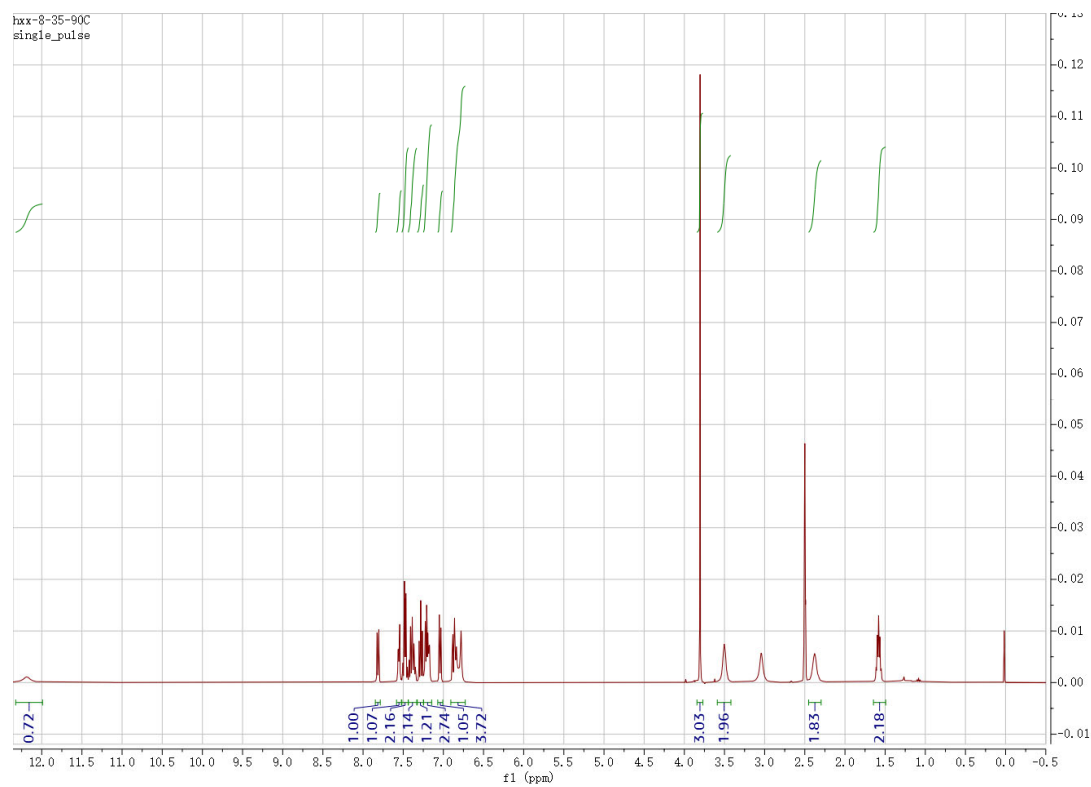

## Compound A15:

### HR-ESI-MS:

HXX-10-15 #48 RT: 0.31 AV: 1 NL: 1.35E7  
T: FTMS + p ESI Full ms [100.0000-1500.0000]

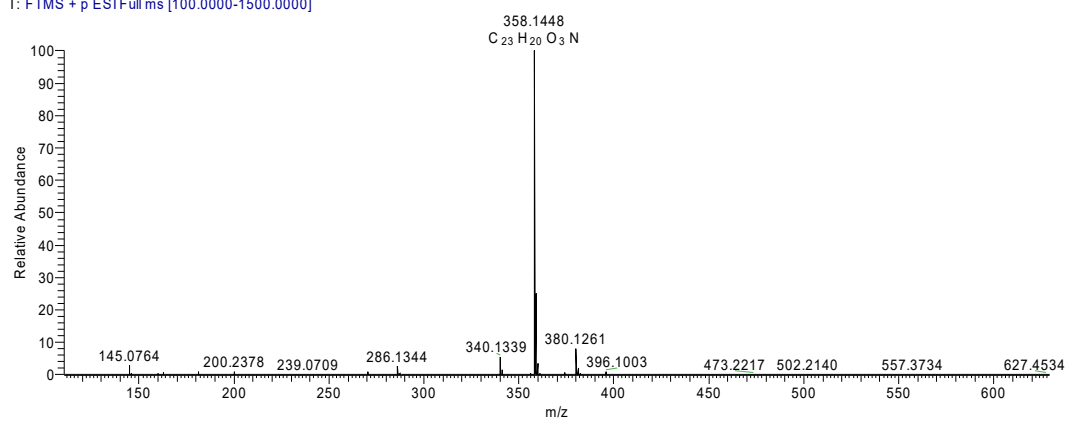

## $^1\text{H}$ -NMR:

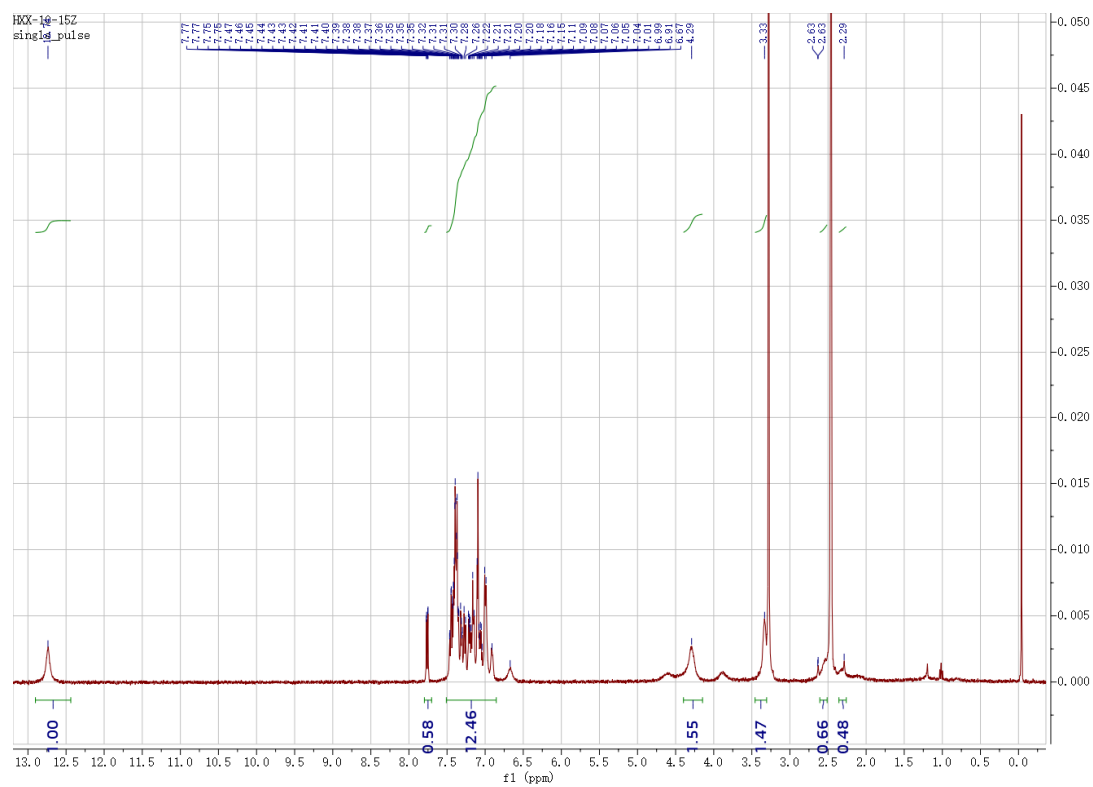

## Compound A16:

## HR-ESI-MS:

HXX-8-22 #1121 RT: 3.97 AV: 1 NL: 3.65E9  
T: FTMS + c ESI Full ms [100.0000-1500.0000]

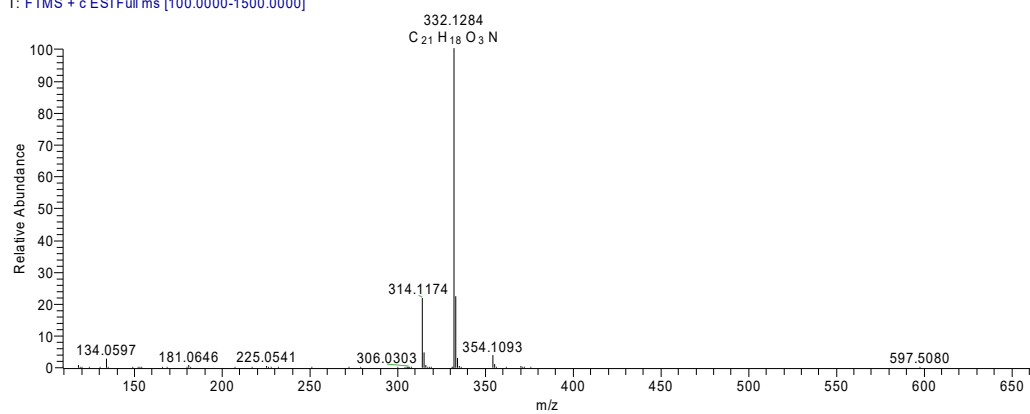

## $^1\text{H}$ -NMR:

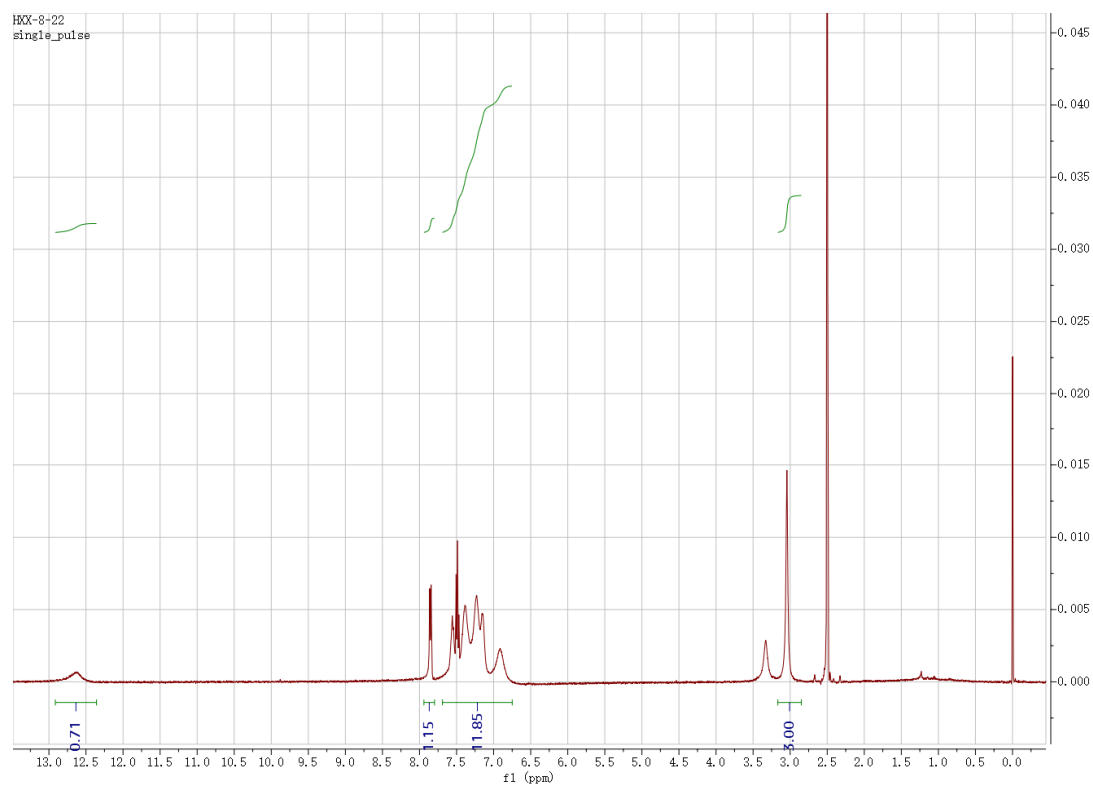

## Compound A17:

### HR-ESI-MS:

HXX-3-16 #47 RT: 0.29 AV: 1 NL: 8.37E7  
T: FTMS + p ESI(Full ms [100.0000-1500.0000])

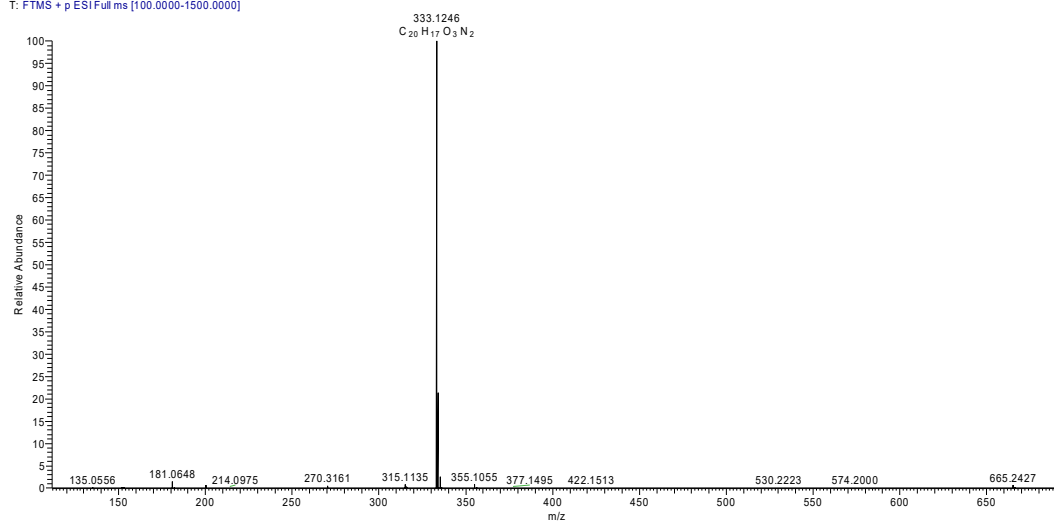

$^1\text{H}$ -NMR:

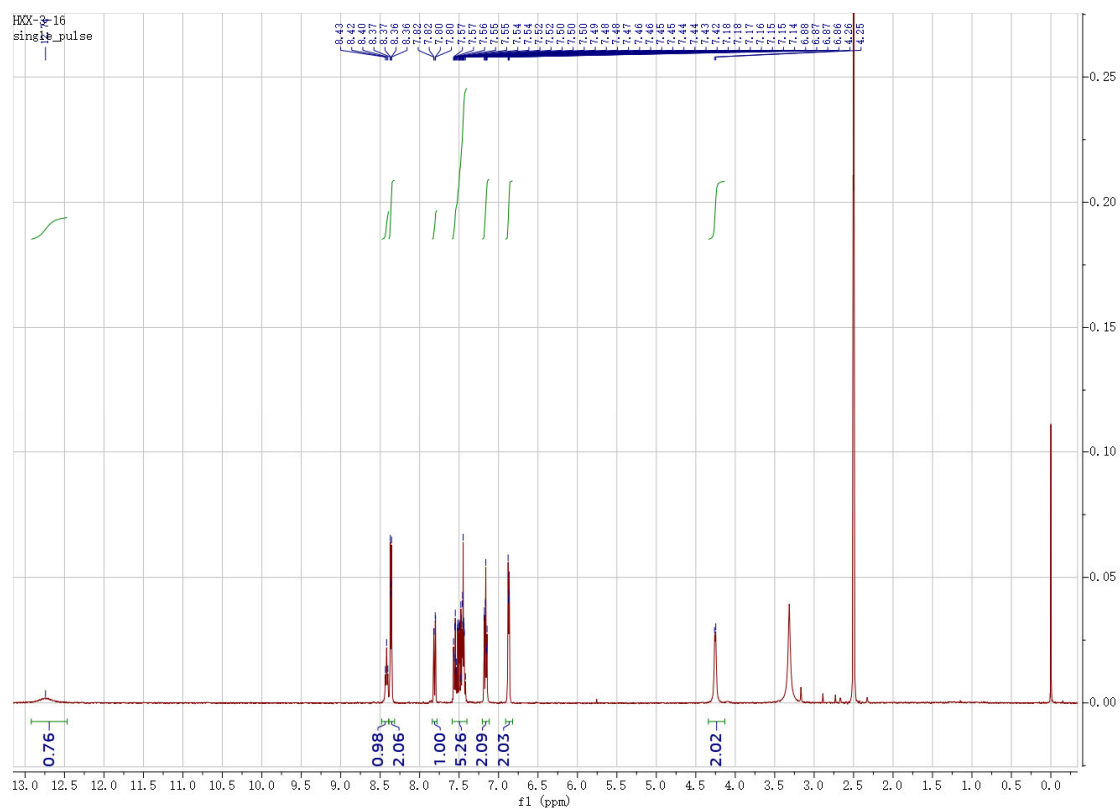

Compound A18:

HR-ESI-MS:

HXX-3-18 #754 RT: 2.75 AV: 1 NL: 3.36E8  
T: FTMS + c ESI Full ms [100.0000-1500.0000]

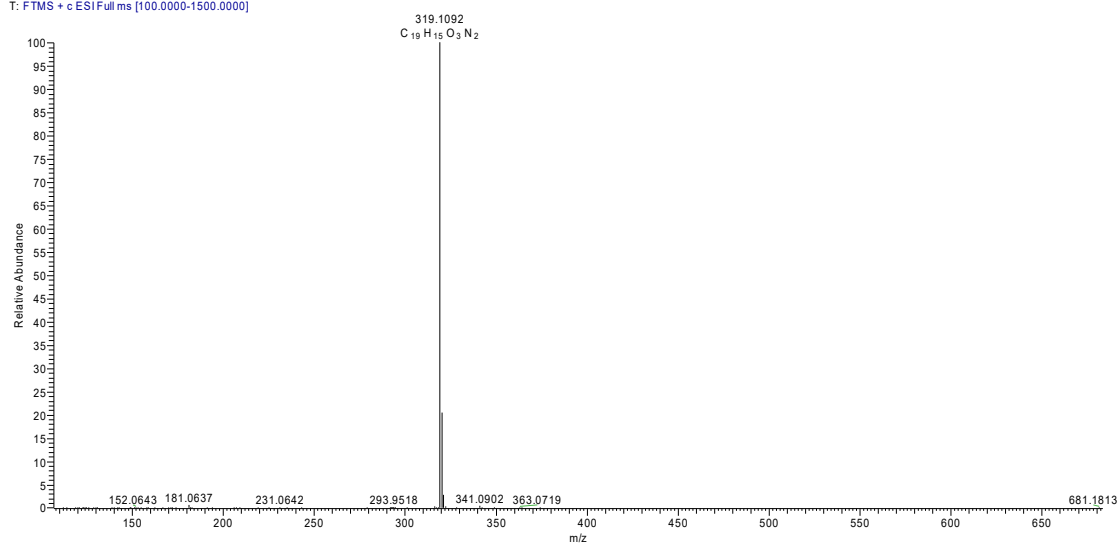

$^1\text{H}$ -NMR:

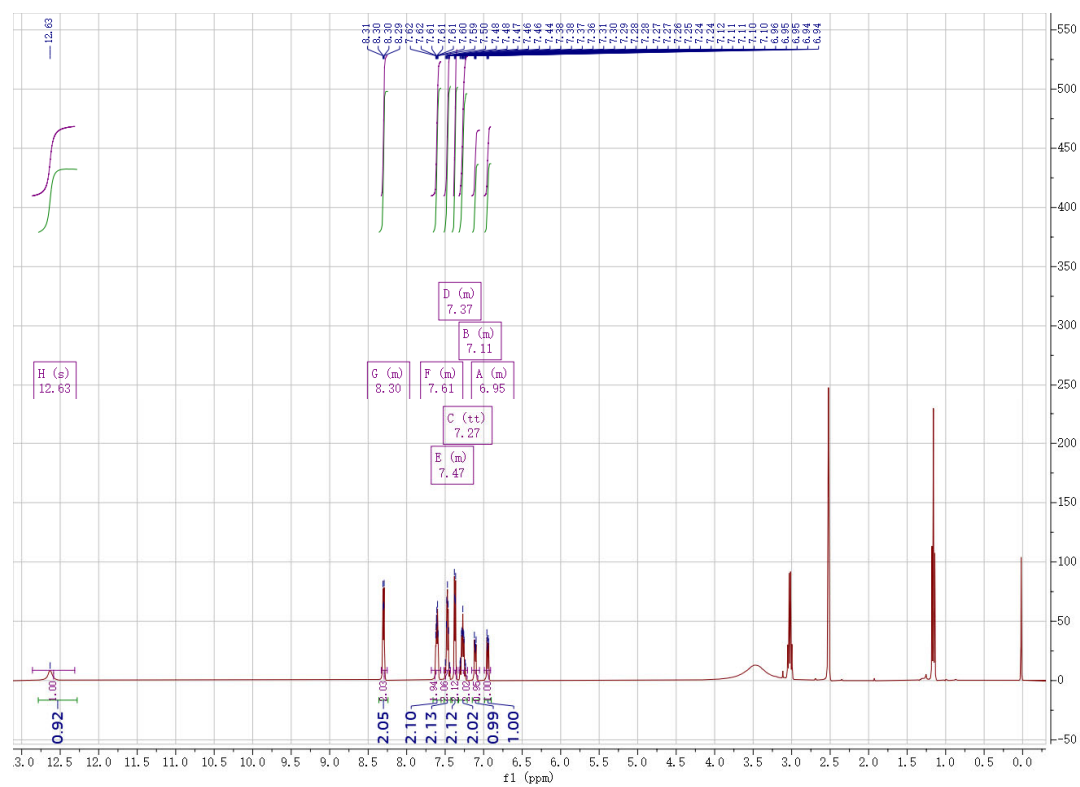

Compound A19:

HR-ESI-MS:

HXX-3-19 #827 RT: 2.99 AV: 1 NL: 8.60E8  
T: FTMS + c ESI Full ms [100.0000-1500.0000]

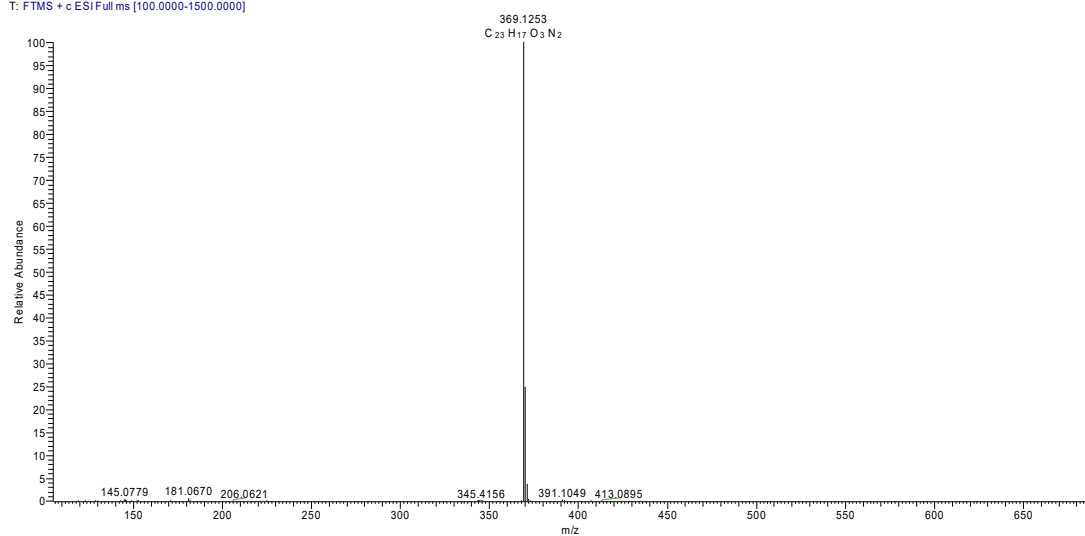



## $^1\text{H}$ -NMR:

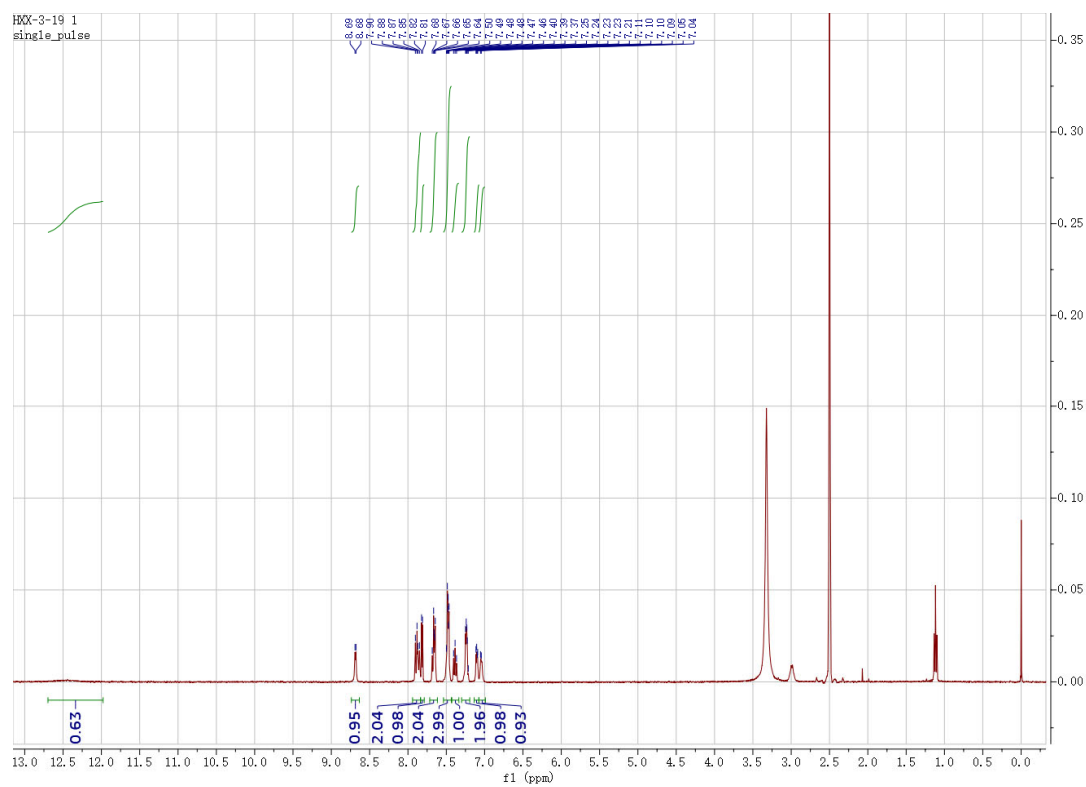

## Compound A20:

### HR-ESI-MS:

HXX-10-23 #50 RT: 0.32 AV: 1 NL: 2.76E6  
T: FTMS + p ESI Full ms [100.0000-1500.0000]

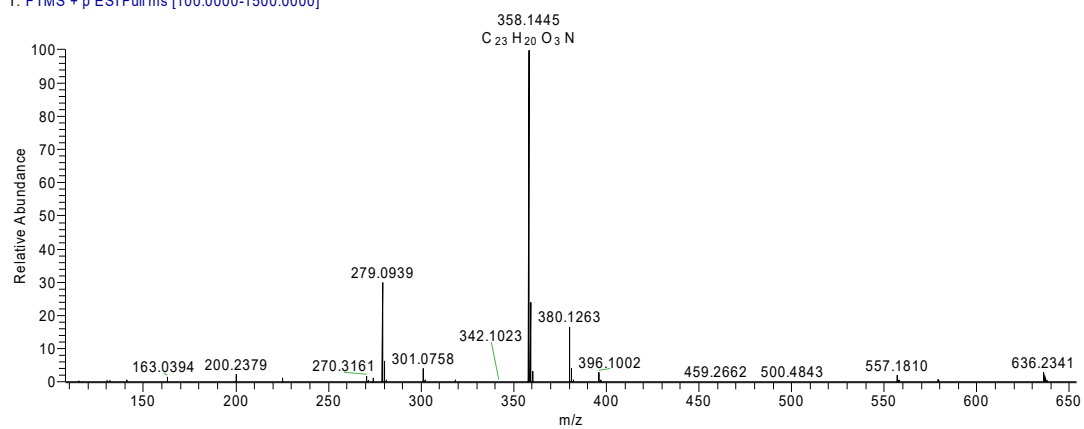

$^1\text{H}$ -NMR:

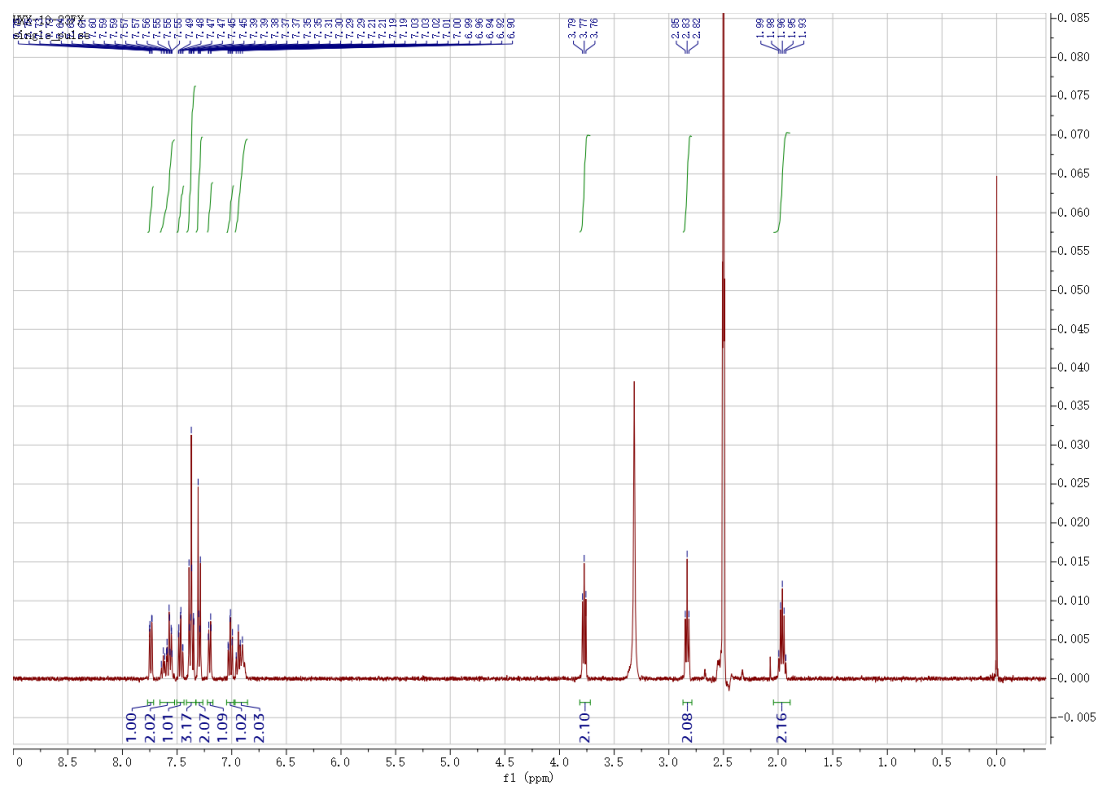

$^{13}\text{C}$ -NMR:

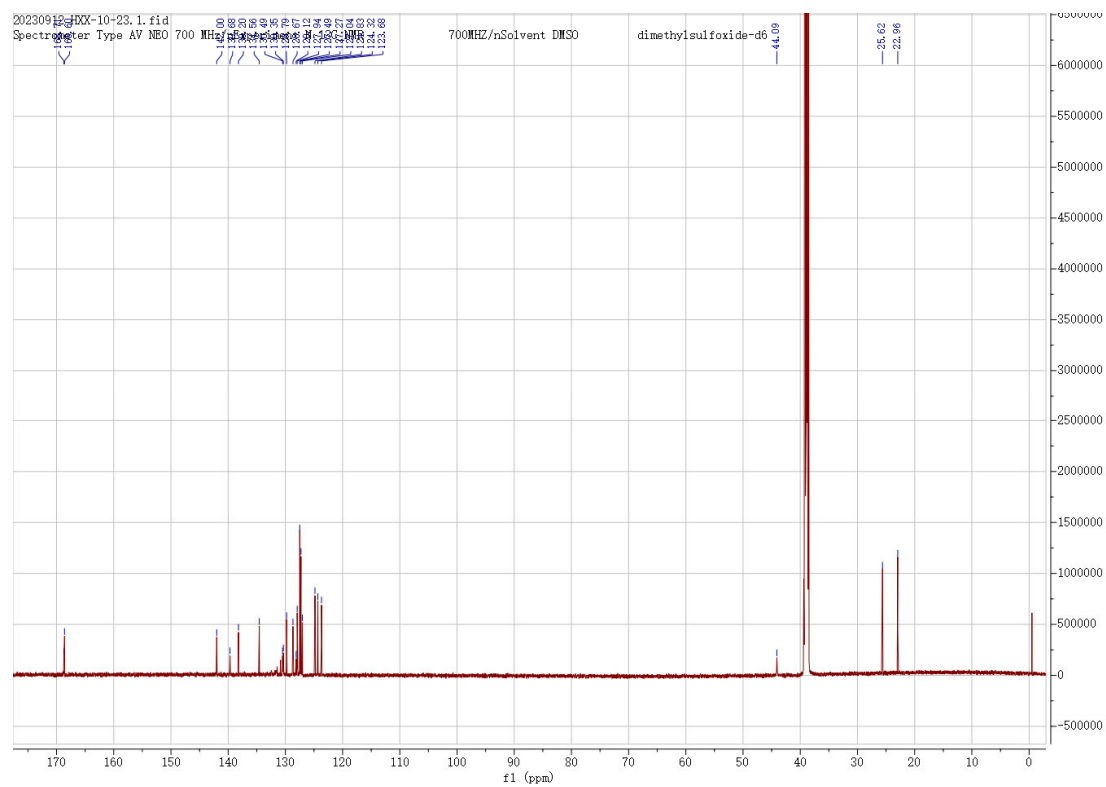

## Compound A21:

### HR-ESI-MS:

HXX-10-27 #51 RT: 0.33 AV: 1 NL: 1.60E6  
T: FTMS + p ESI Full ms [100.0000-1500.0000]

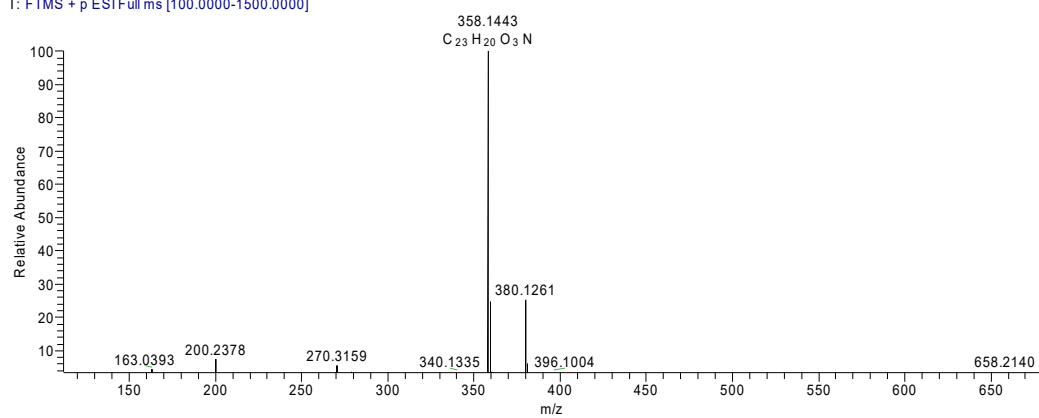

### <sup>1</sup>H-NMR:

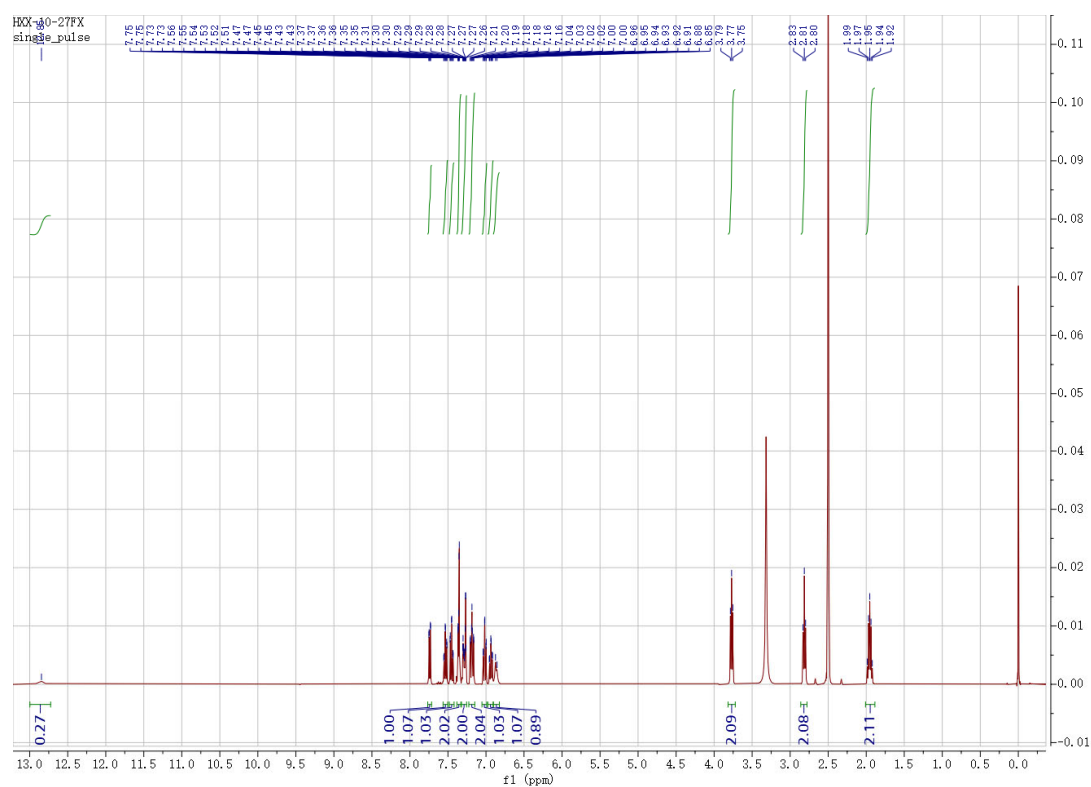

$^{13}\text{C}$ -NMR:

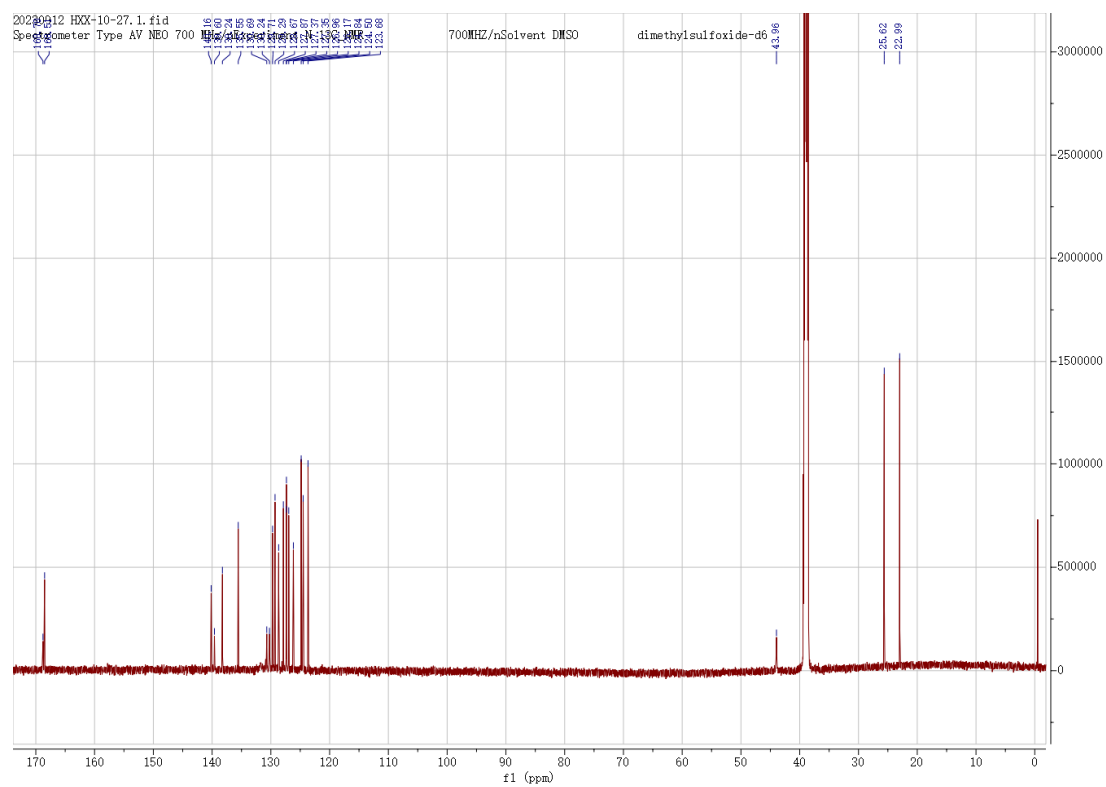

Compound **B1**:

HR-ESI-MS:

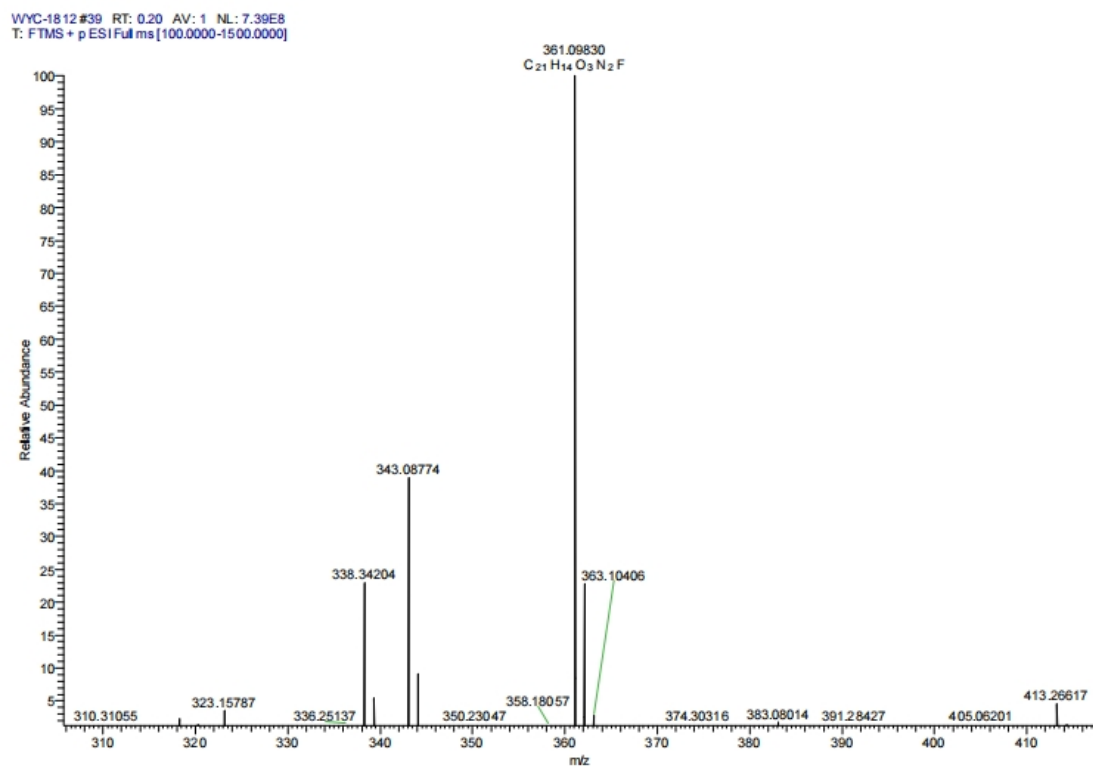

<sup>1</sup>H-NMR: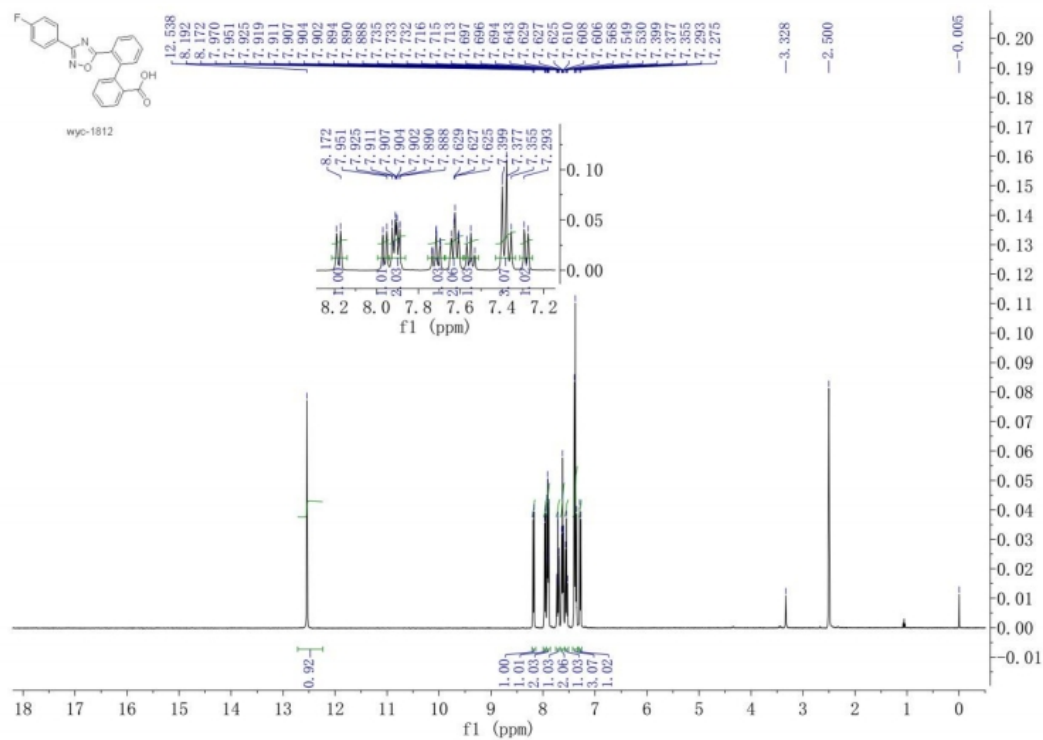<sup>13</sup>C-NMR: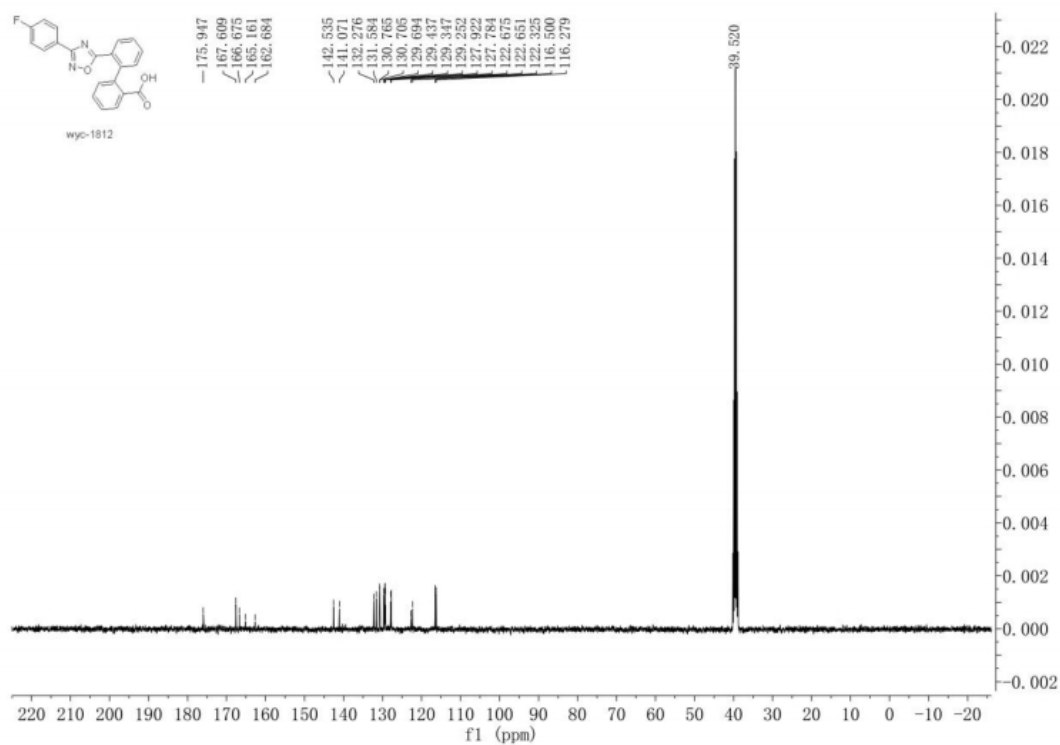

Compound **B2**:

HR-ESI-MS:

WYC-1811 #29 RT: 0.17 AV: 1 NL: 1.08E9  
T: FTMS + p ESI Full ms [100.0000-1500.0000]

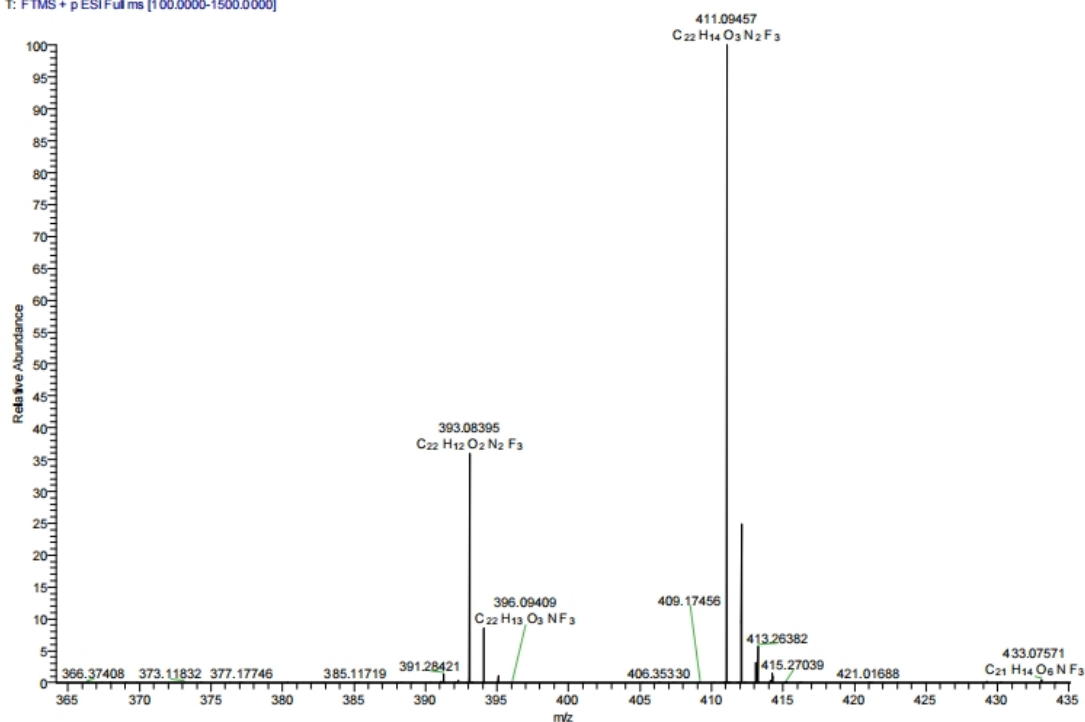

<sup>1</sup>H-NMR:

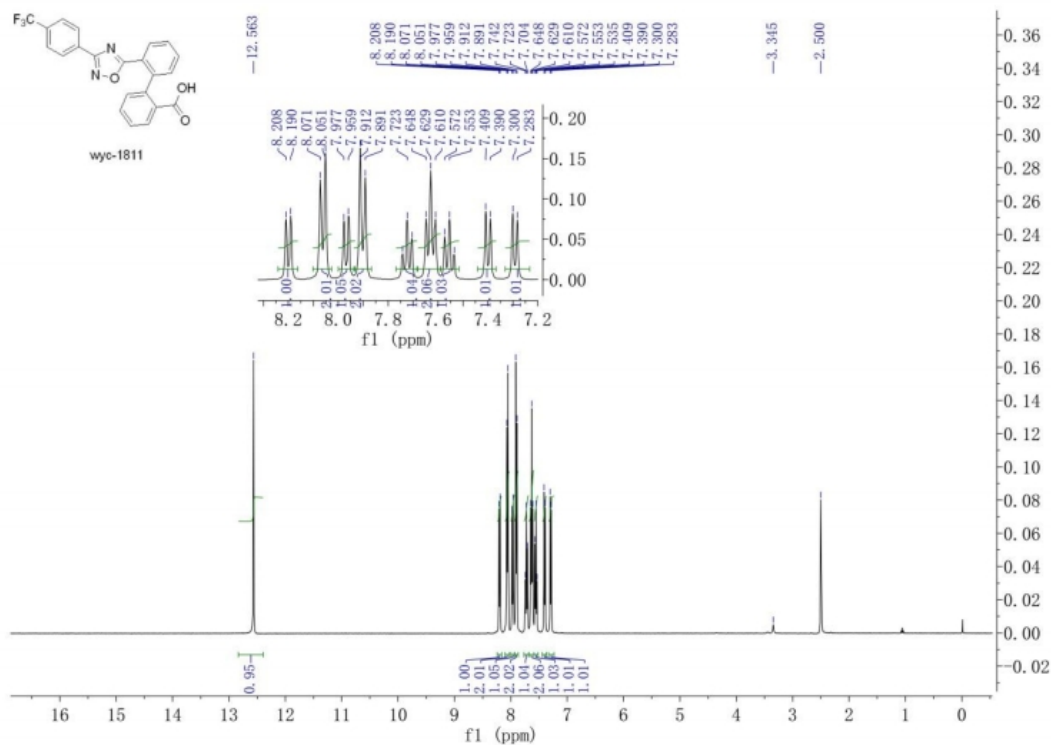

$^{13}\text{C}$ -NMR:

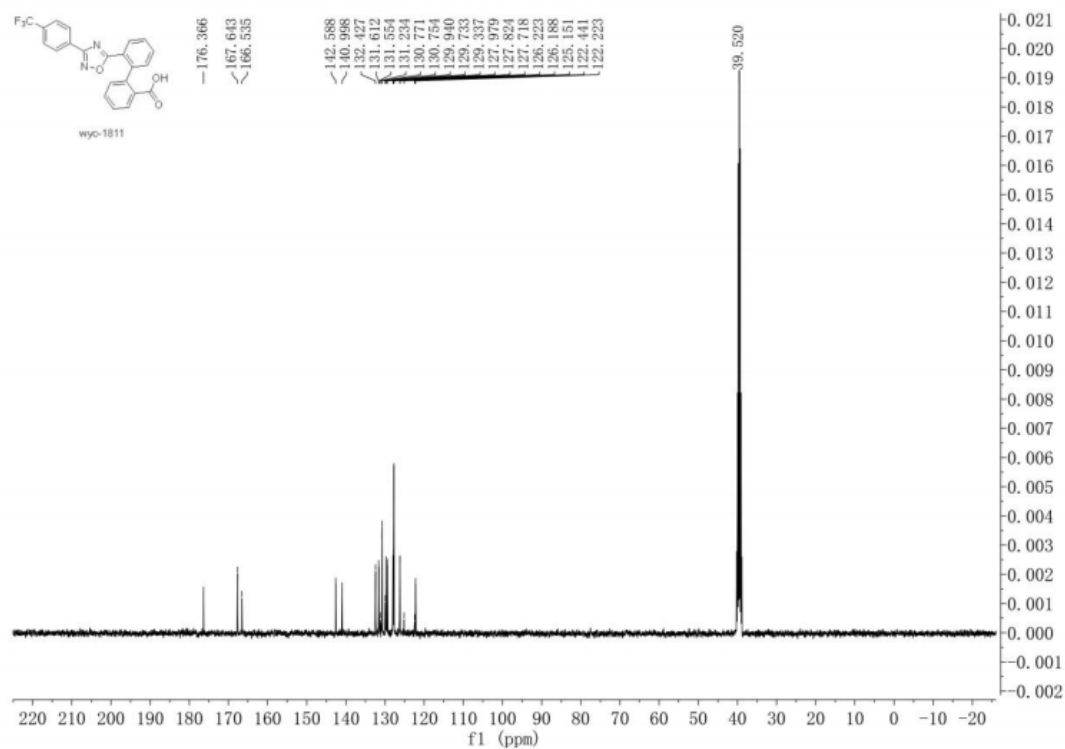

Compound **B3**:

HR-ESI-MS:

WYC-1816 #35 RT: 0.20 AV: 1 NL: 8.33E8  
T: FTMS + p ESI Full ms [100.0000-1500.0000]

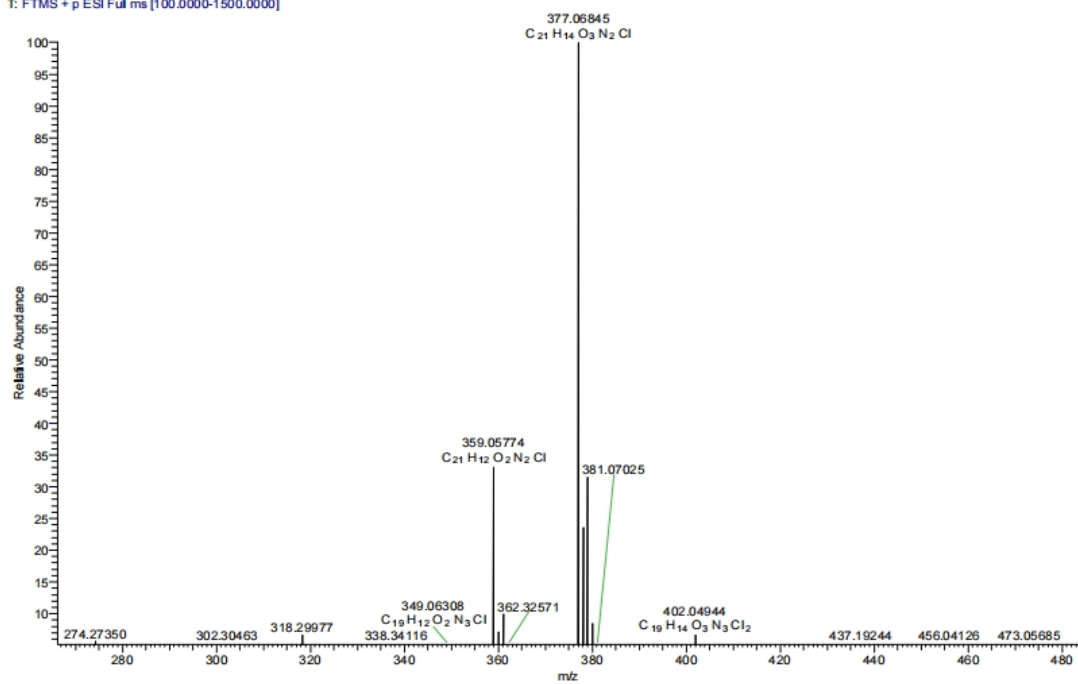

$^1\text{H}$ -NMR:

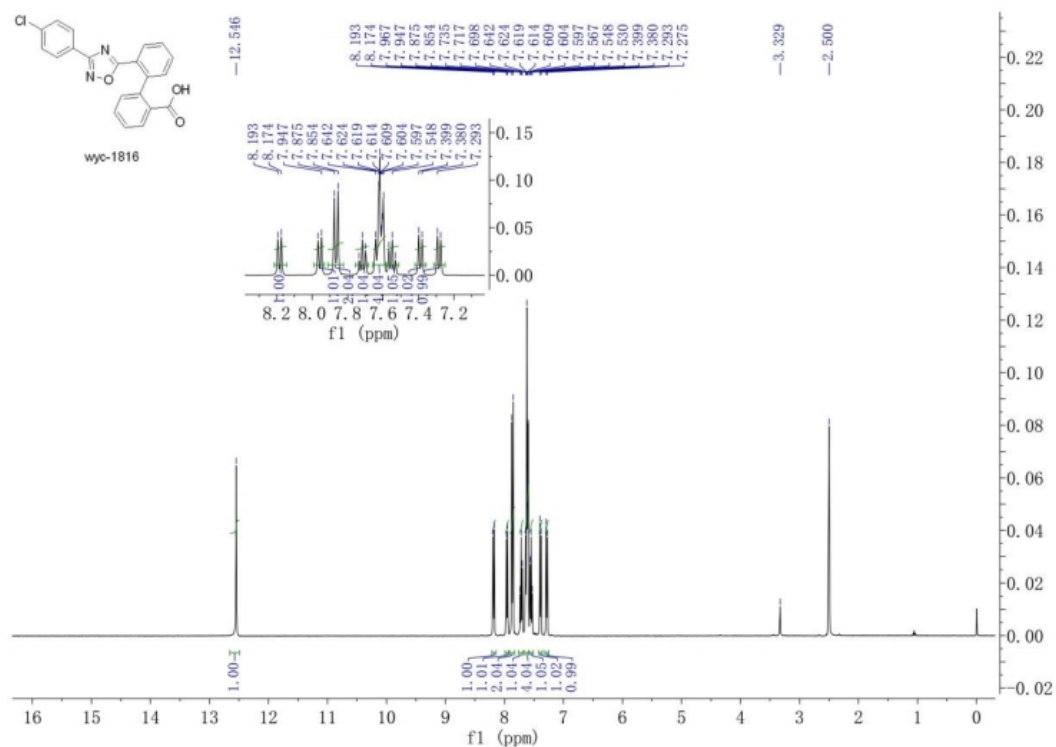

$^{13}\text{C}$ -NMR:

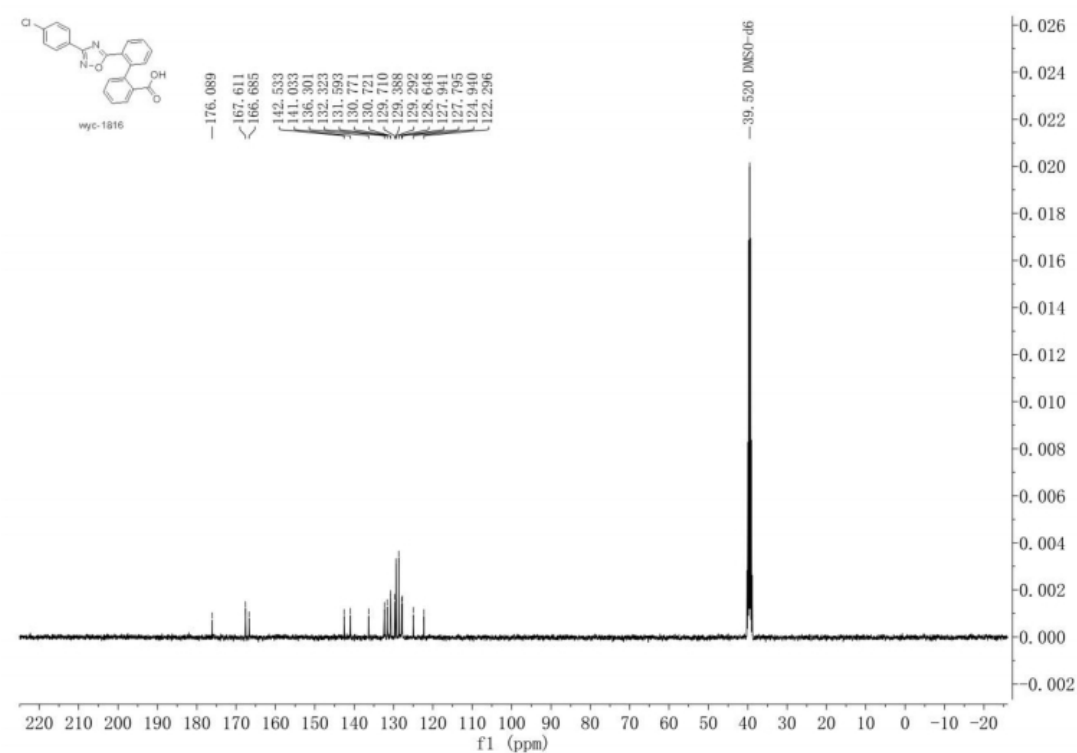



## Compound B4:

## HR-ESI-MS:

WYC-1810 #39 RT: 0.21 AV: 1 NL: 2.03E8  
T: FTMS + p ESI Full ms [100.0000-1500.0000]

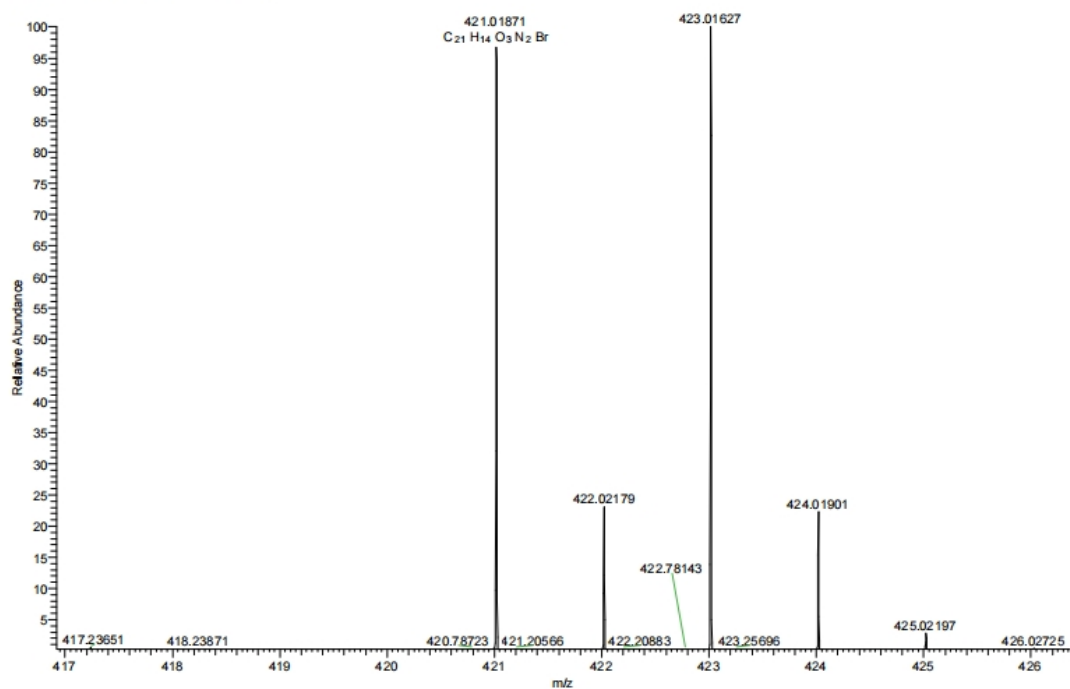

## <sup>1</sup>H-NMR:

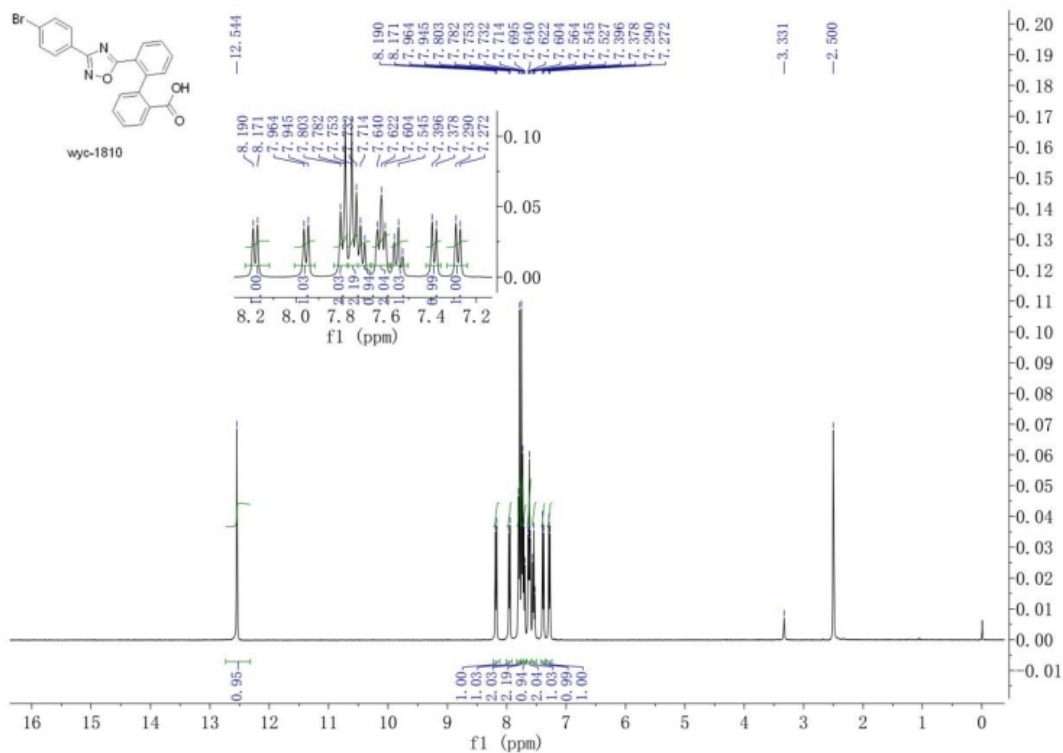

$^{13}\text{C}$ -NMR:

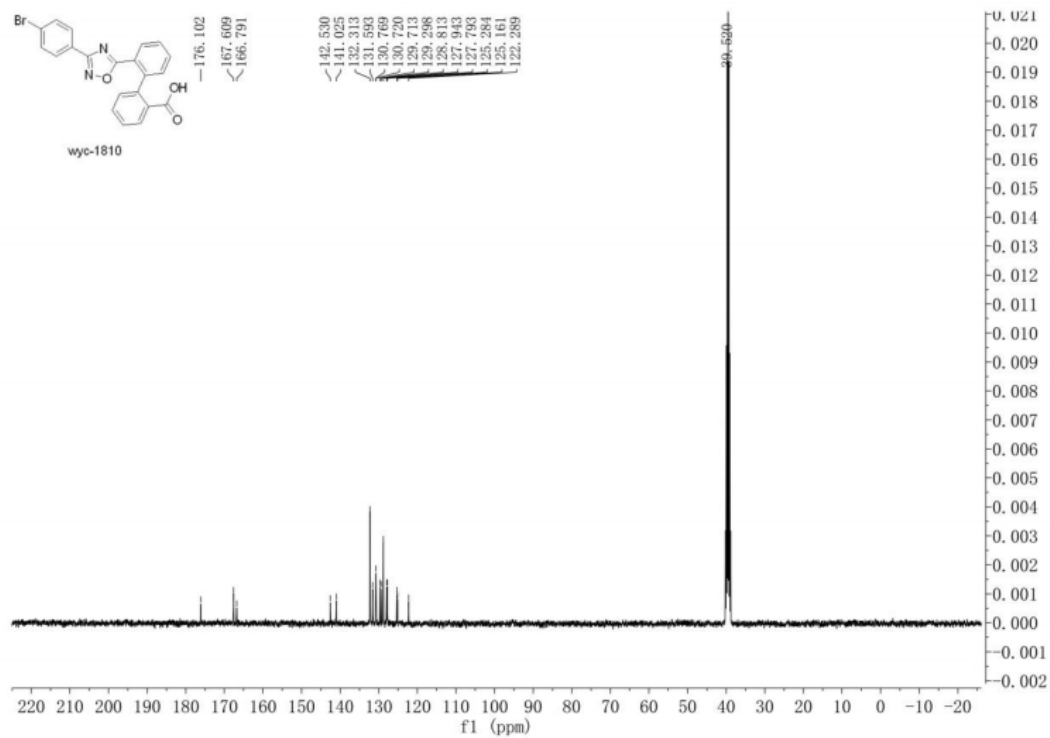

Compound **B5**:

HR-ESI-MS:

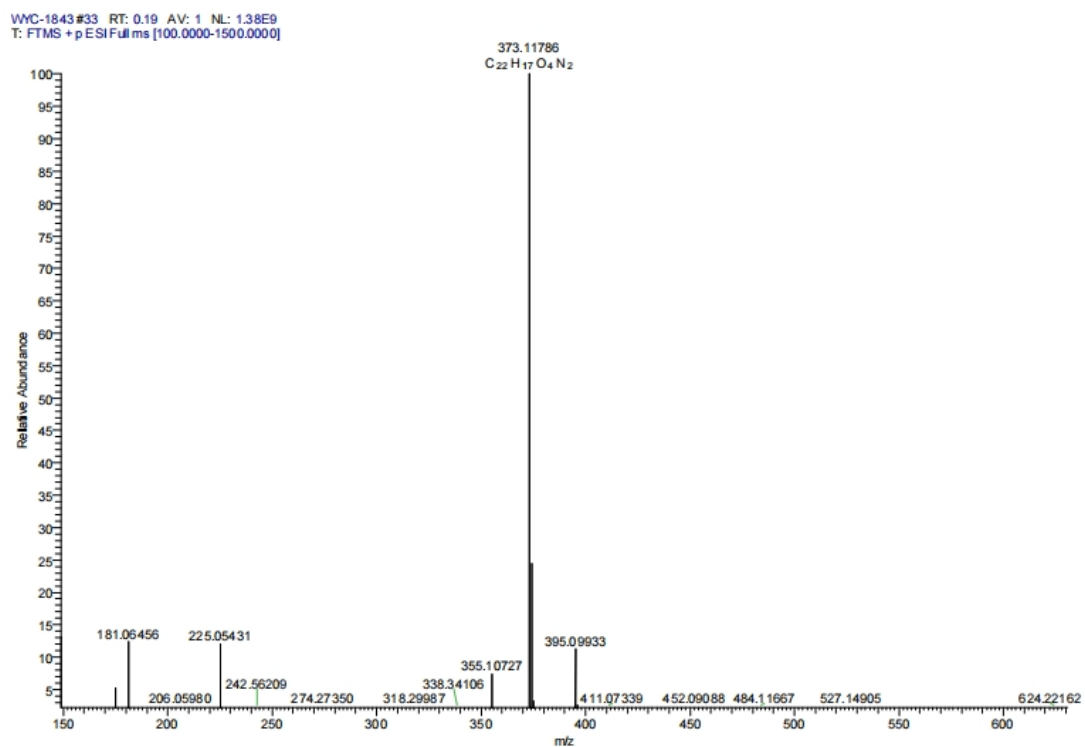

$^1\text{H}$ -NMR:

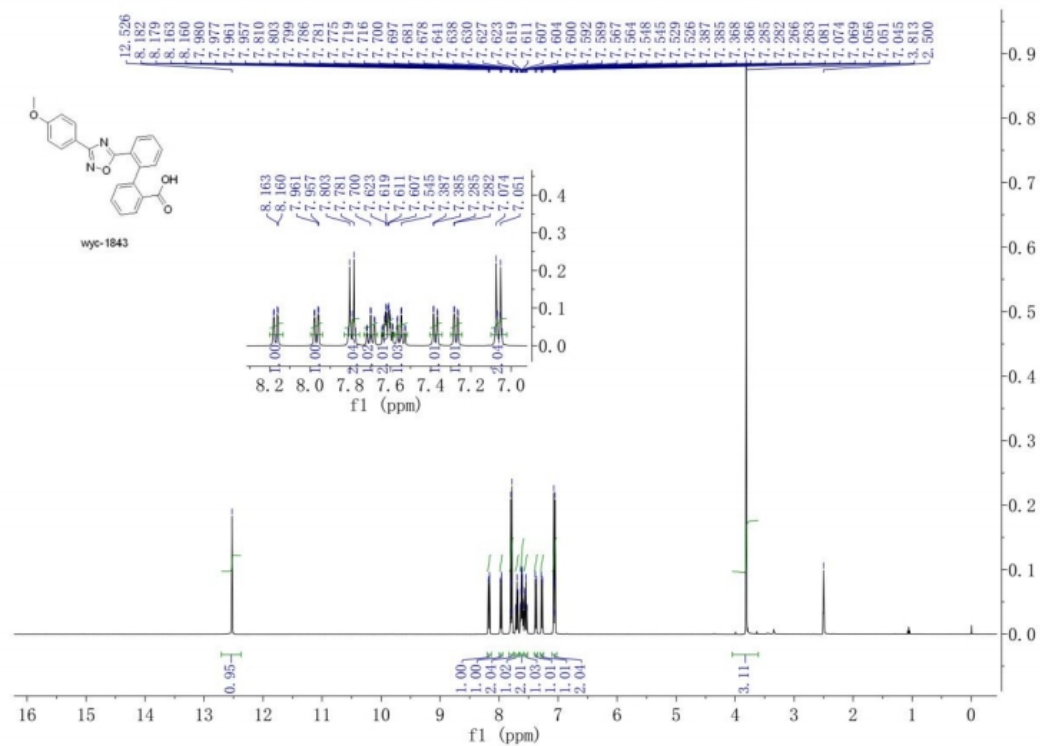

$^{13}\text{C}$ -NMR:

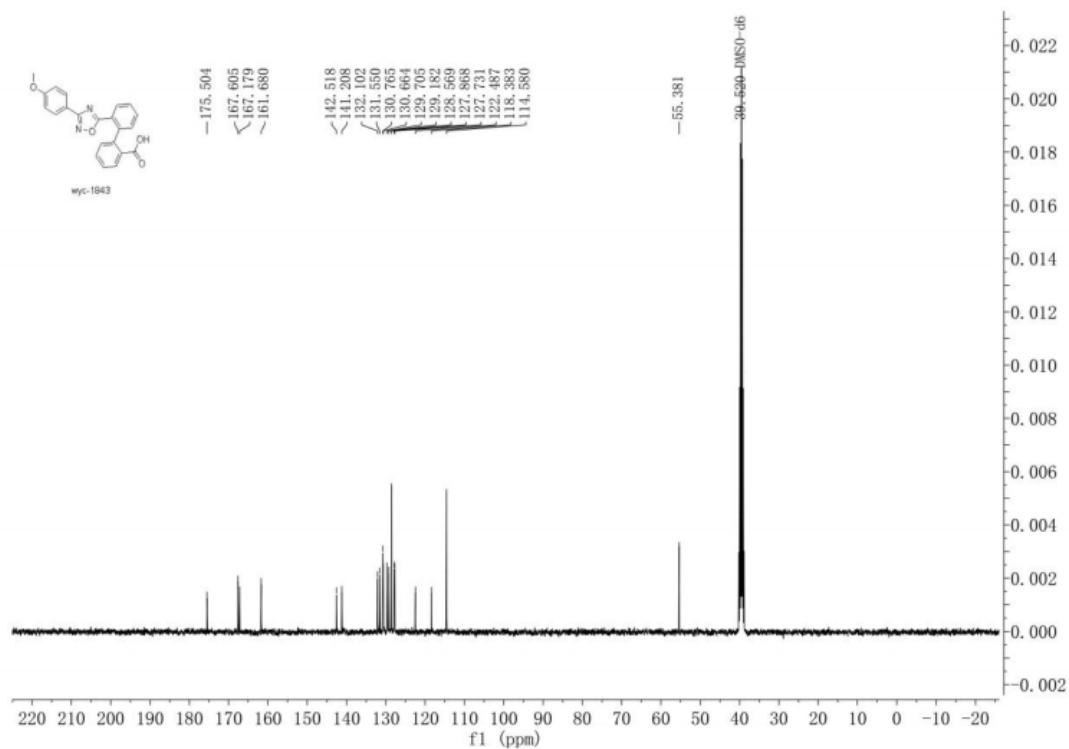

# Compound B6:

## HR-ESI-MS:

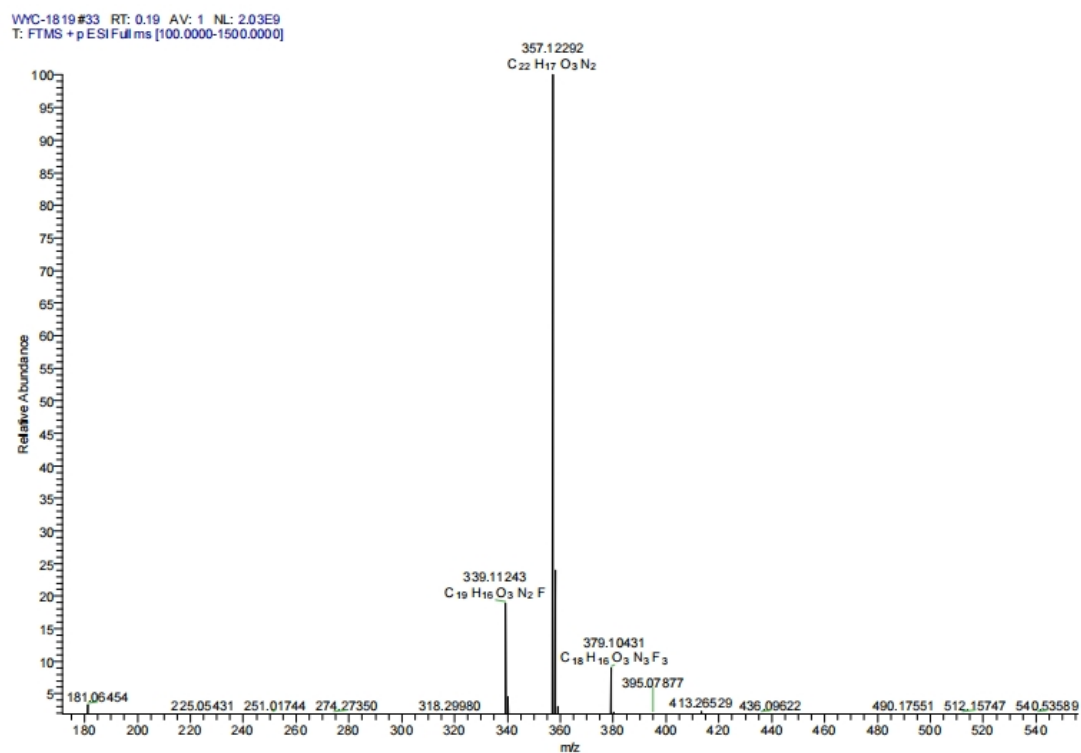

## <sup>1</sup>H-NMR:

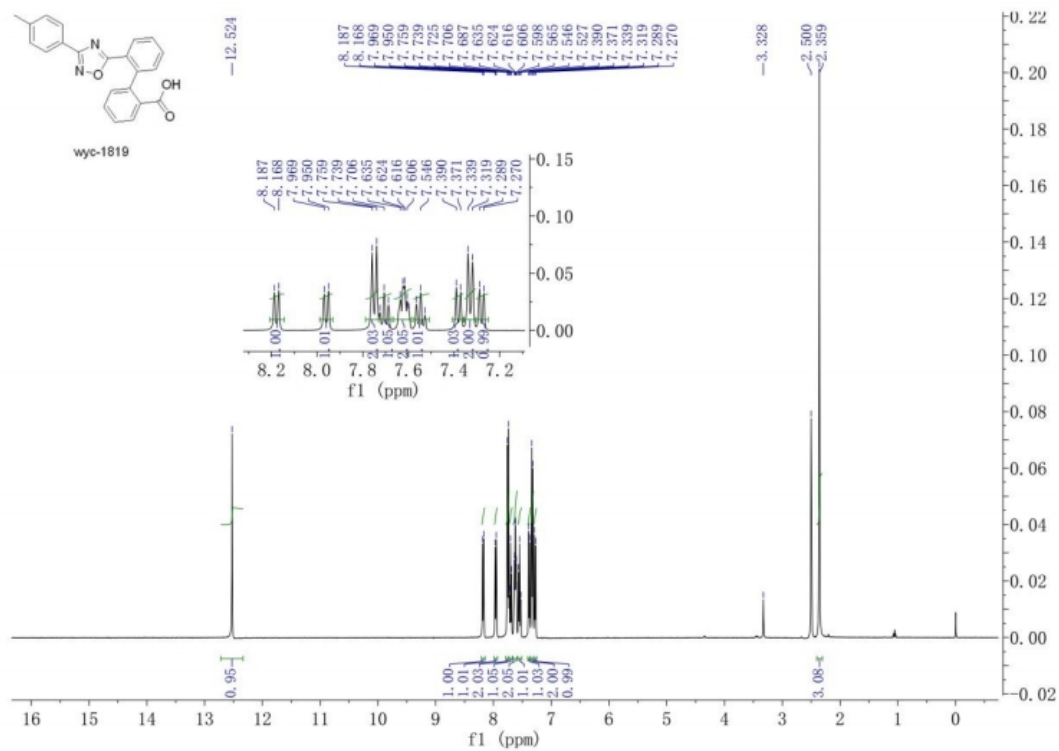

$^{13}\text{C}$ -NMR:

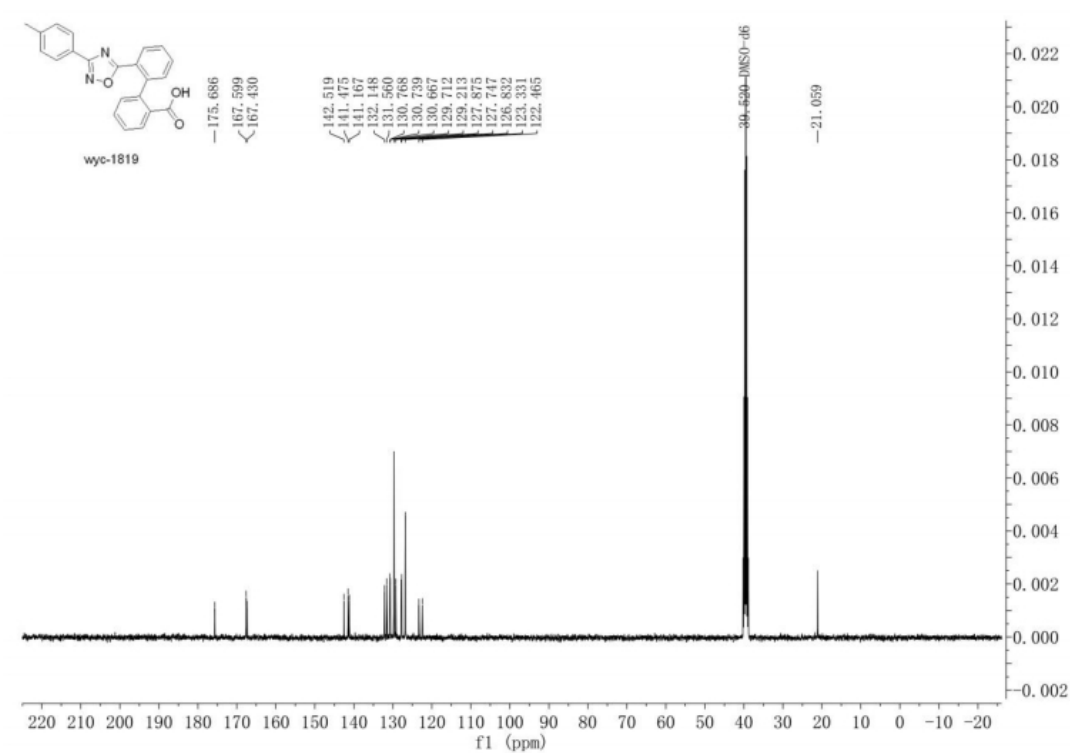

Compound **B7**:

HR-ESI-MS:

WYC-1817 #36 RT: 0.20 AV: 1 NL: 3.35E8  
T: FTMS + p ESI Full ms [100.0000-1500.0000]

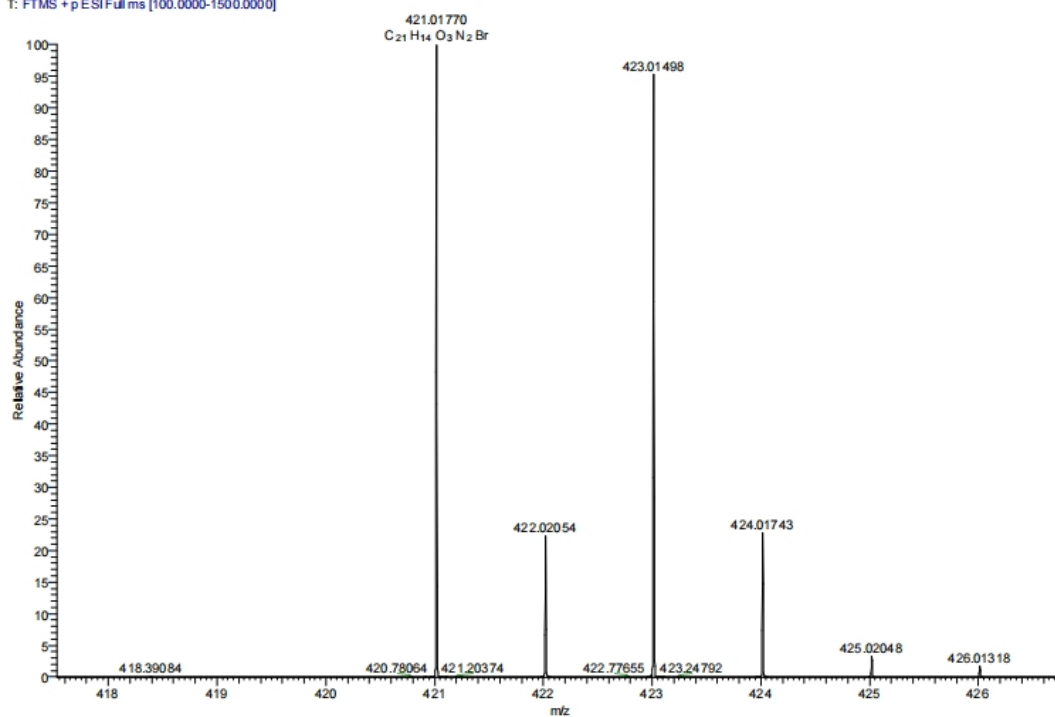

$^1\text{H}$ -NMR:

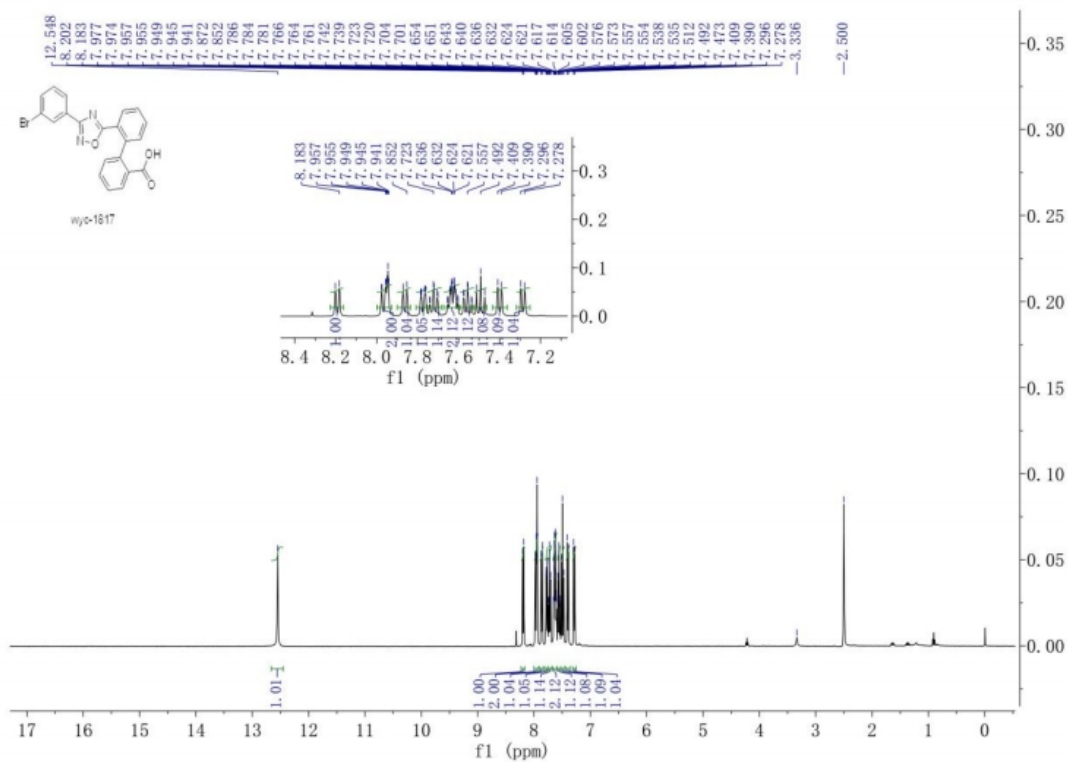

$^{13}\text{C}$ -NMR:

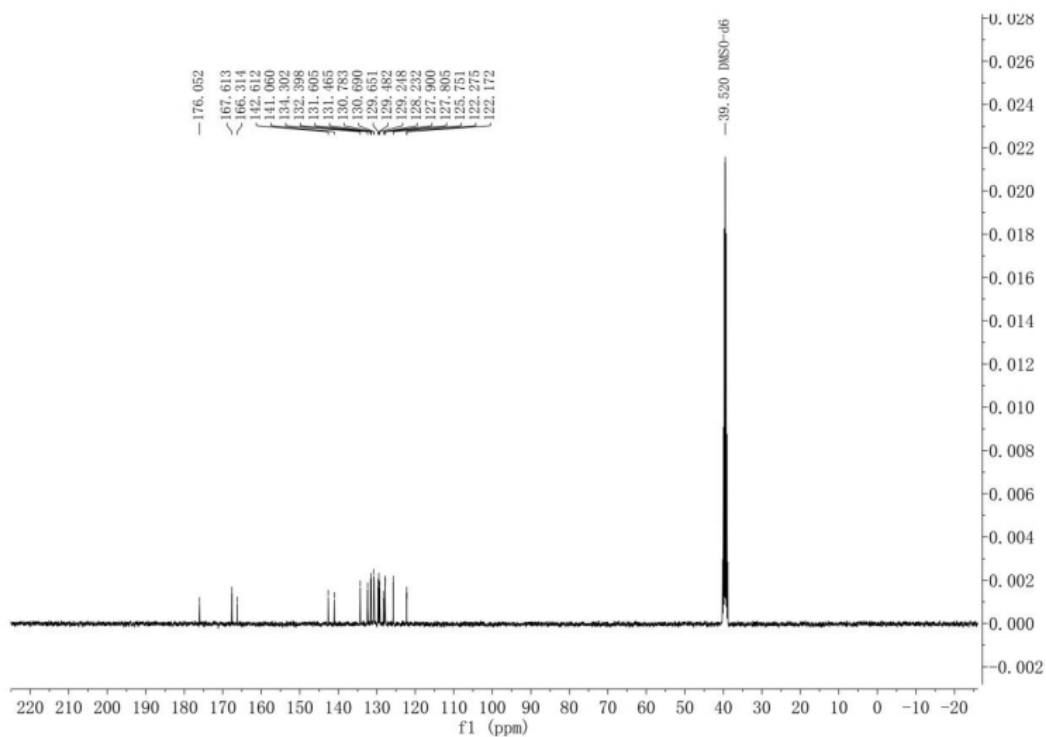

Compound B8:

HR-ESI-MS:

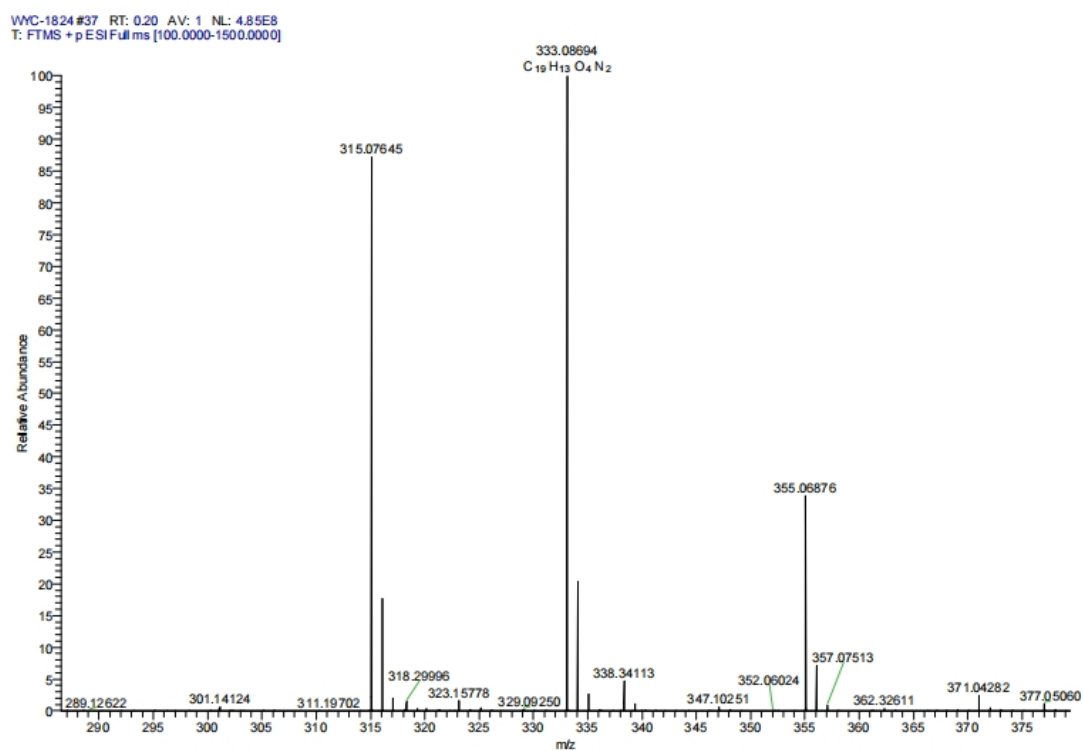

<sup>1</sup>H-NMR:

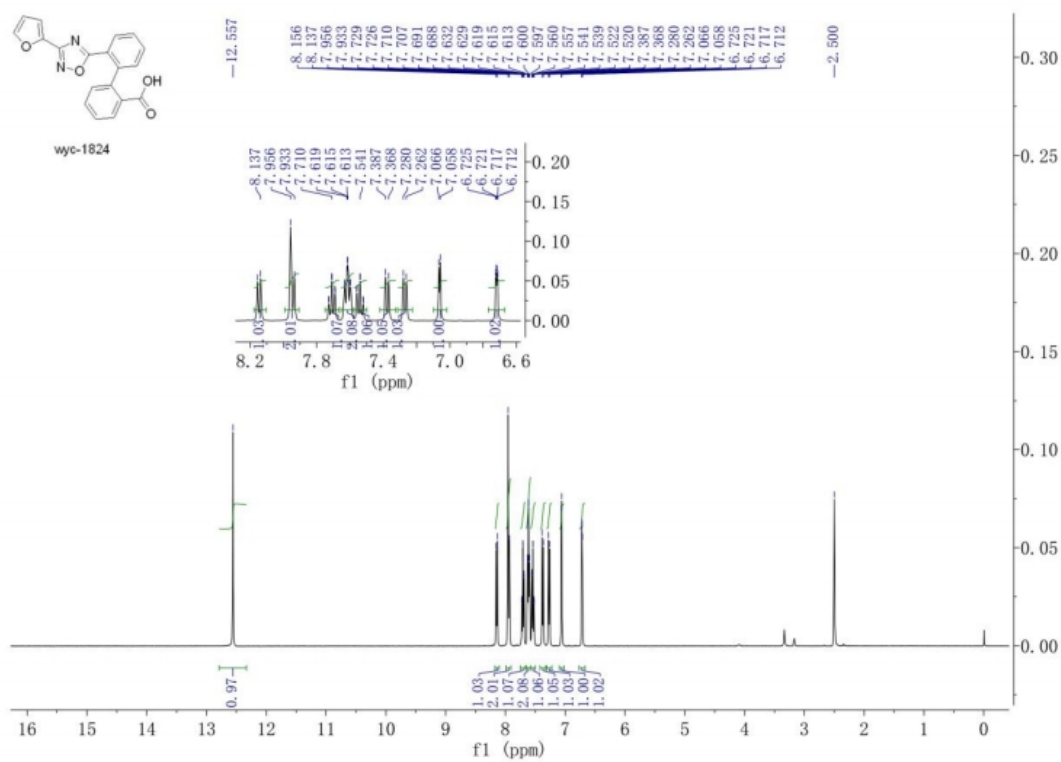

$^{13}\text{C}$ -NMR:

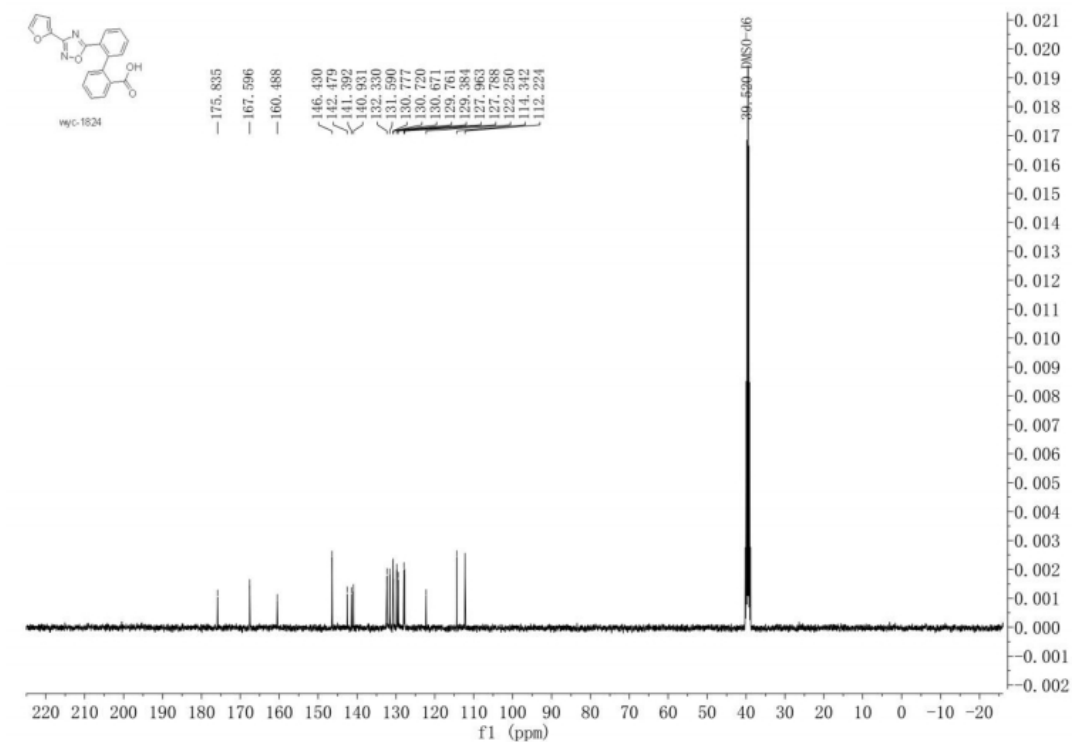

Compound **B9**:

HR-ESI-MS:

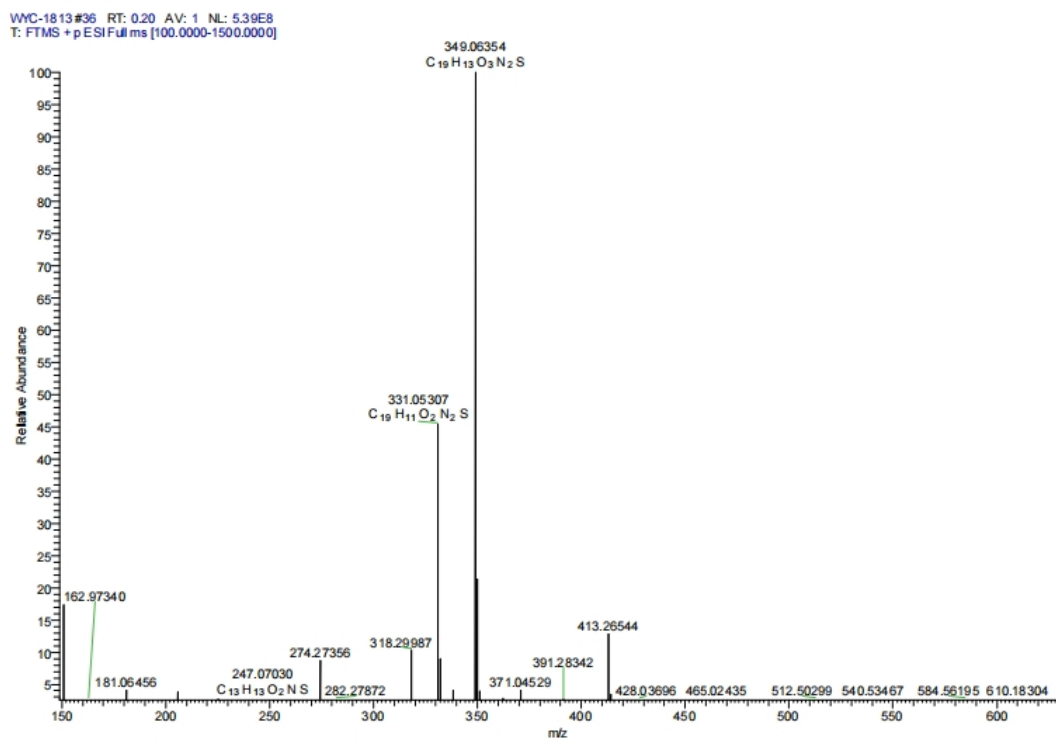



$^1\text{H}$ -NMR:

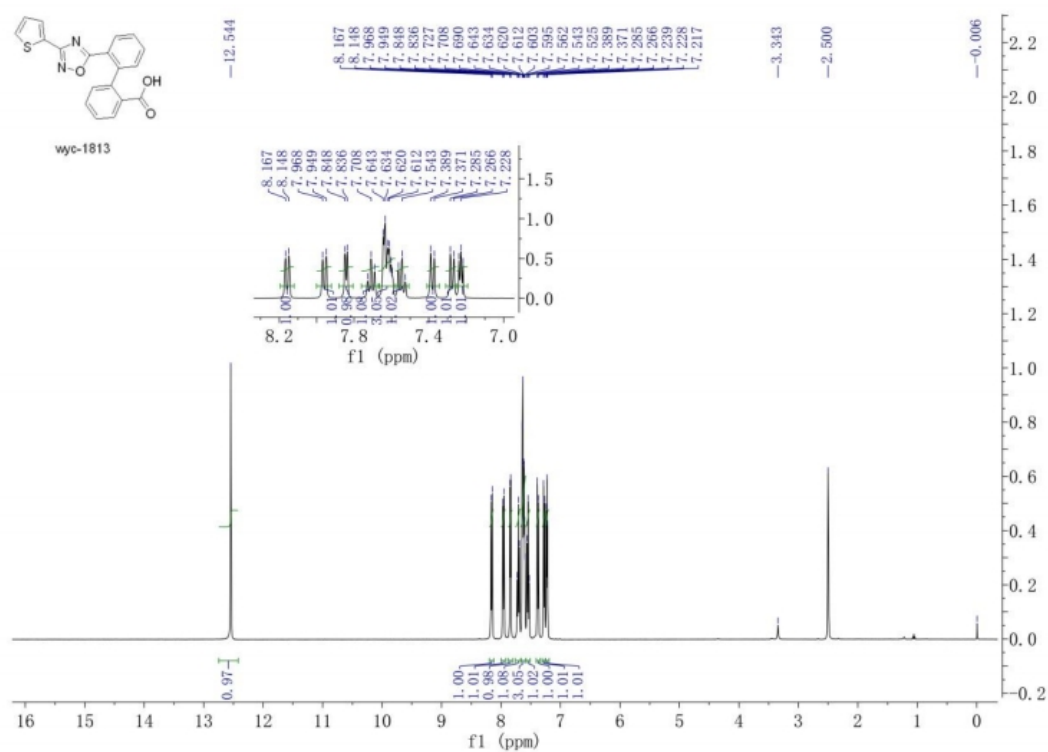

$^{13}\text{C}$ -NMR:

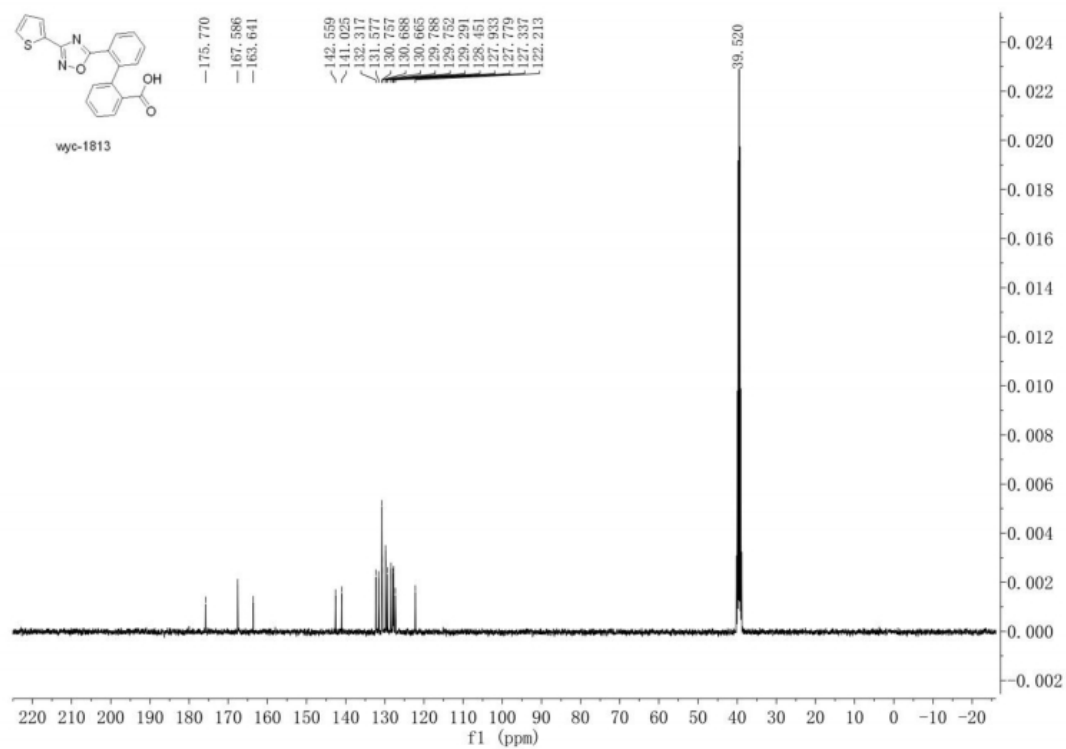

HR-ESI-MS:

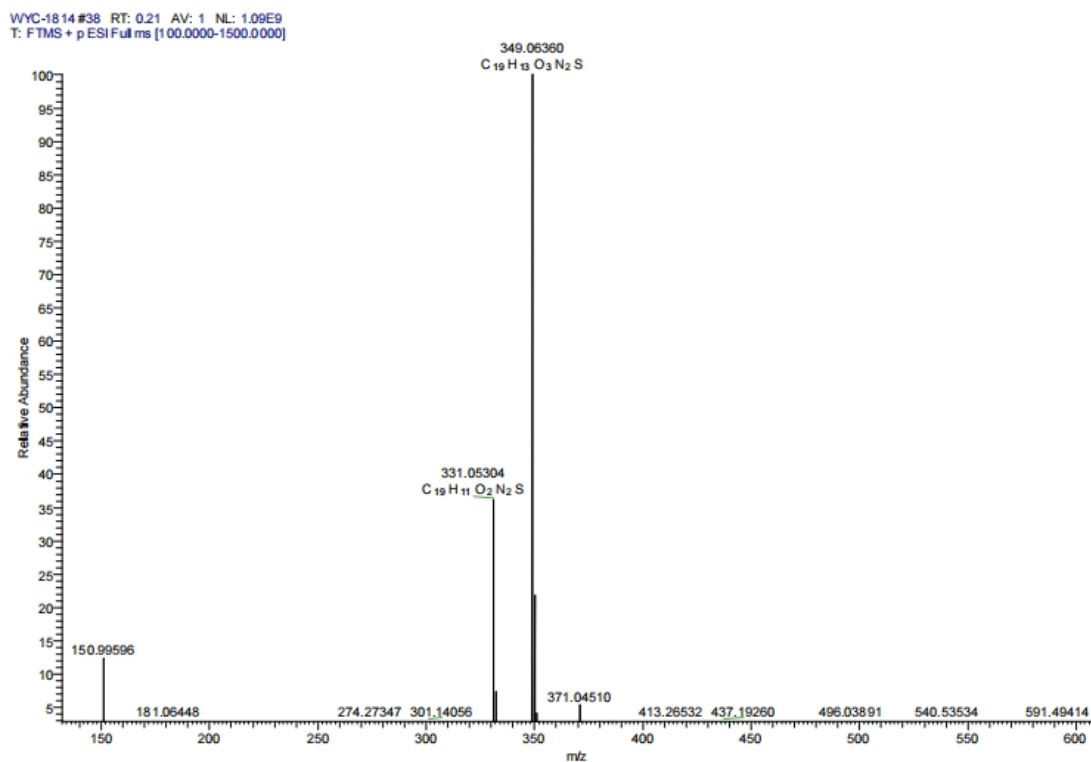<sup>1</sup>H-NMR: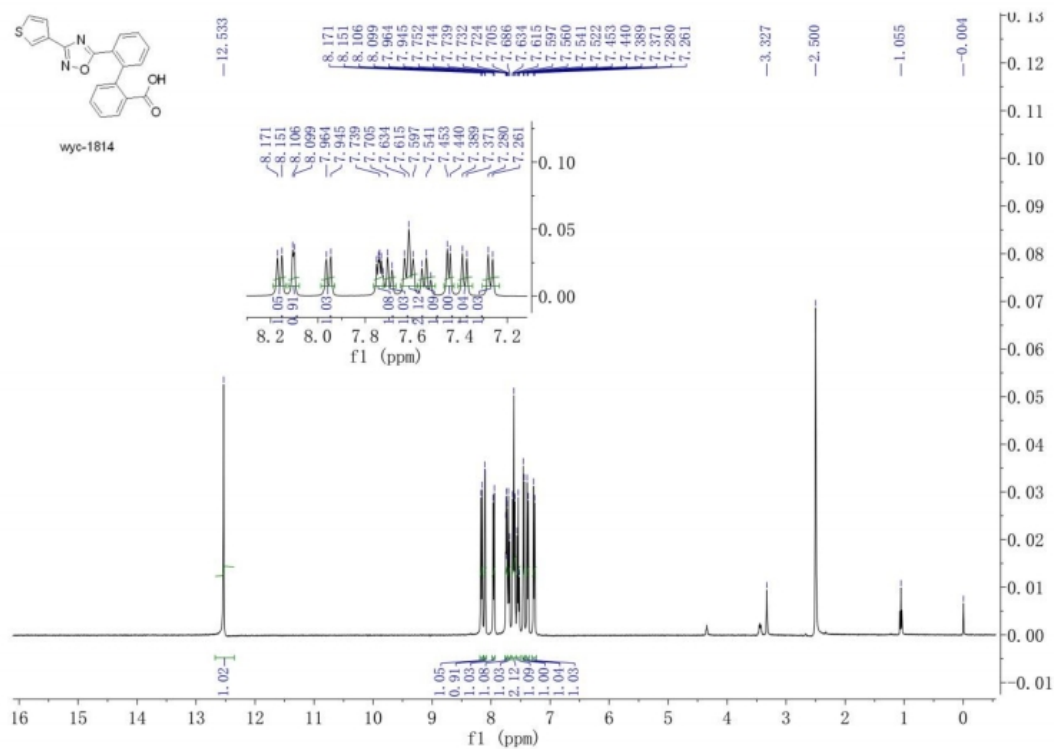

$^{13}\text{C}$ -NMR:

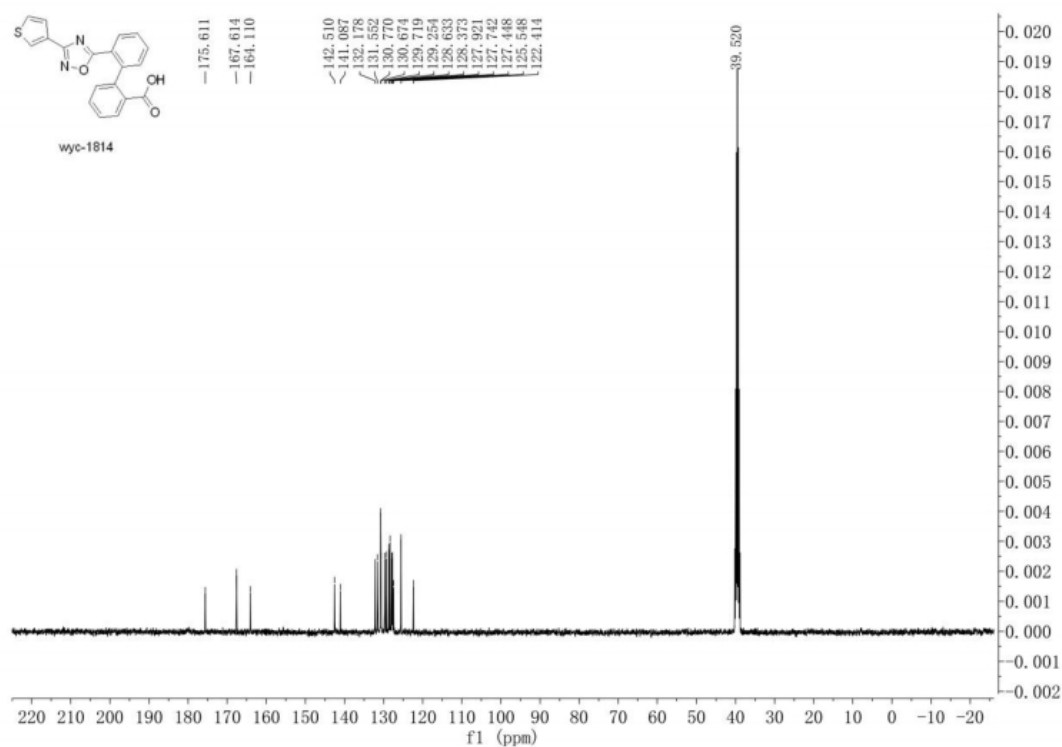

Compound **B11**:

HR-ESI-MS:

HXX-16-11 #60 RT: 0.31 AV: 1 NL: 1.06E8  
T: FTMS + p ESI Full ms [100.0000-1500.0000]

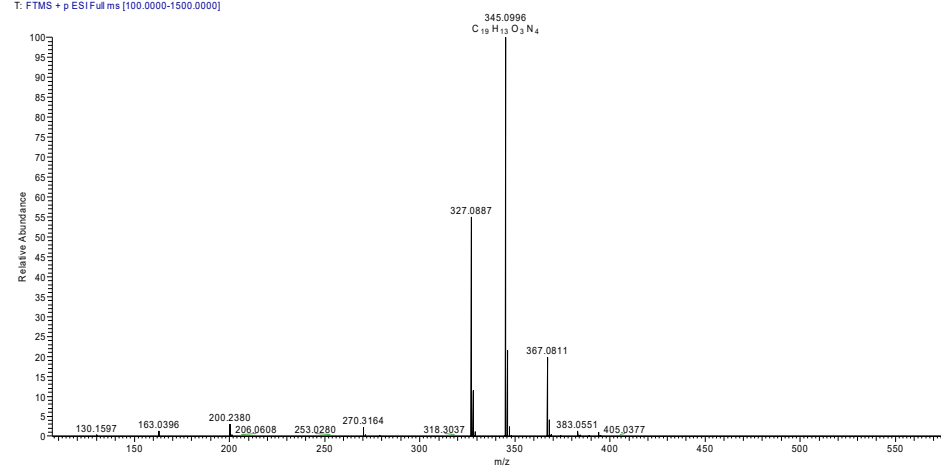

# <sup>1</sup>H-NMR:

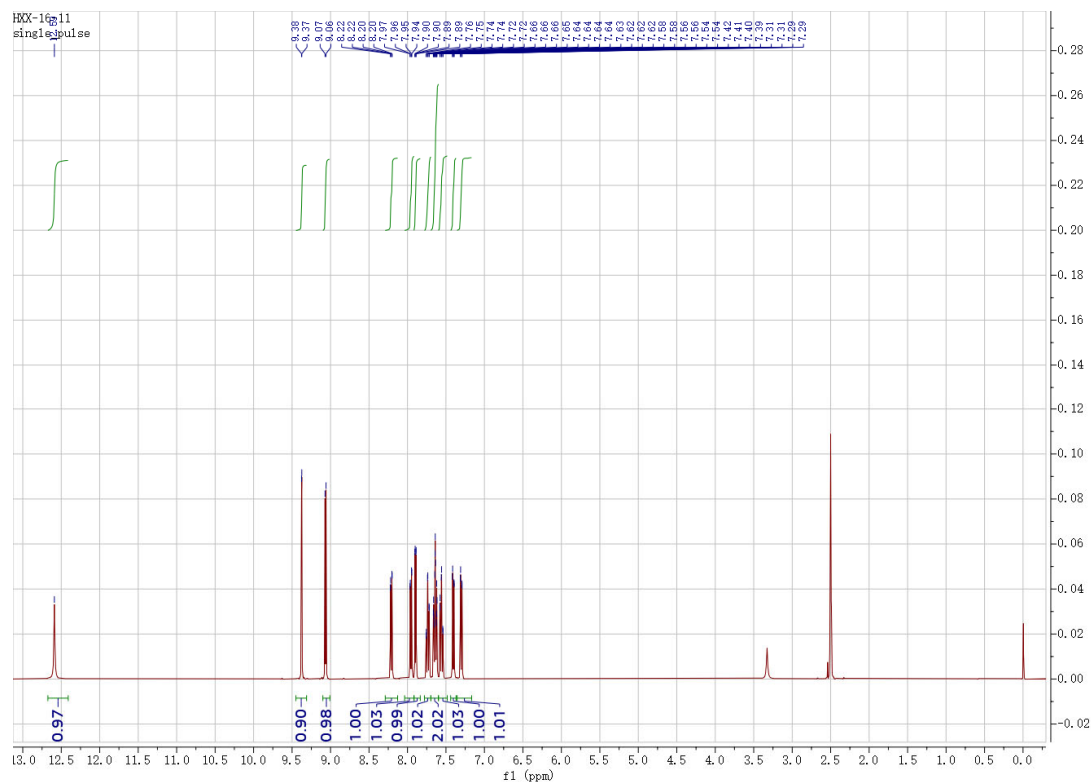

# <sup>13</sup>C-NMR:

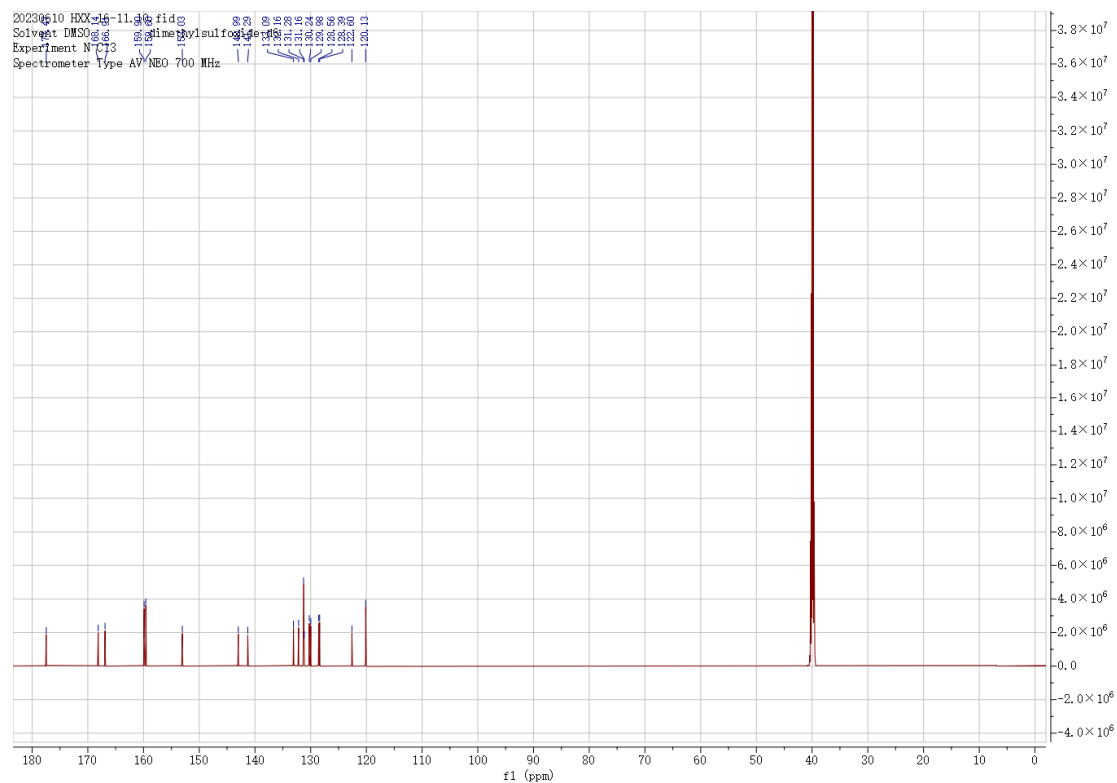

## Compound B12:

### HR-ESI-MS:

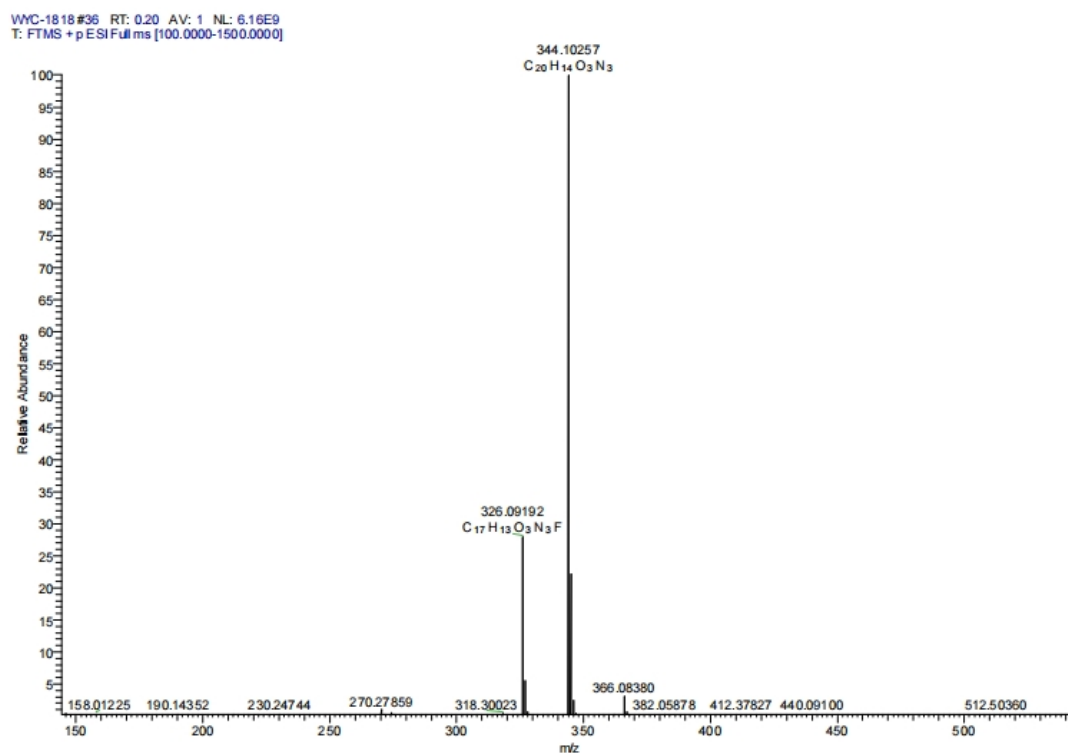

### $^1H$ -NMR:

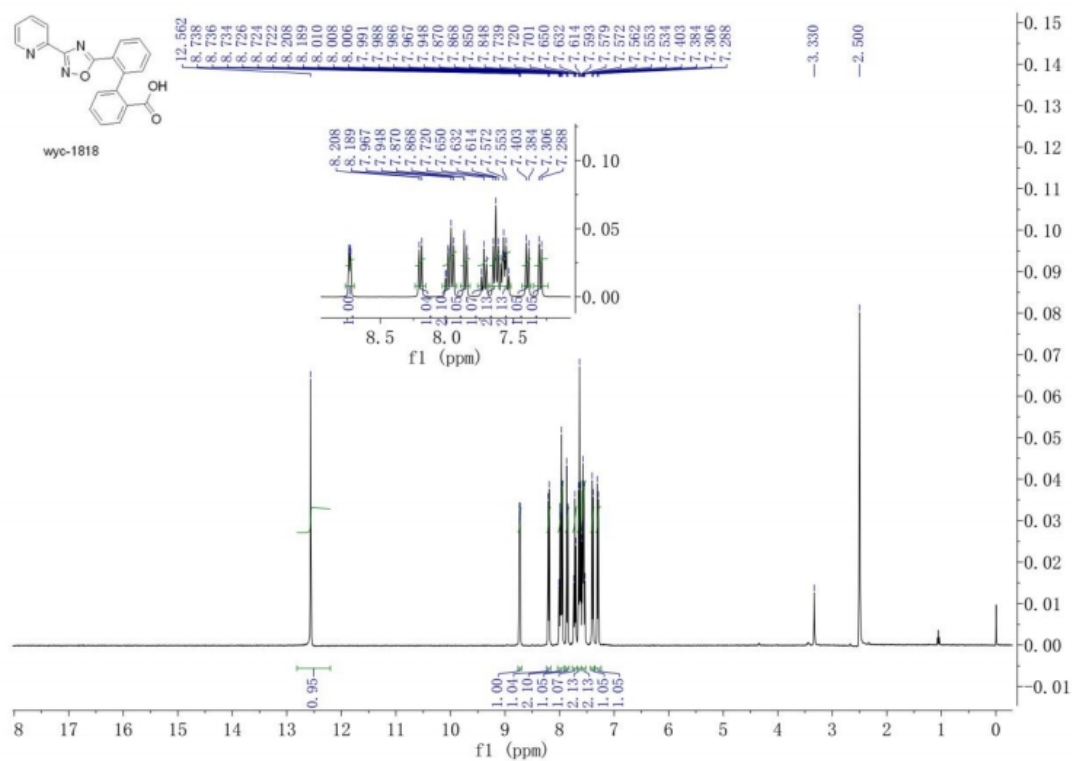

$^{13}\text{C}$ -NMR:

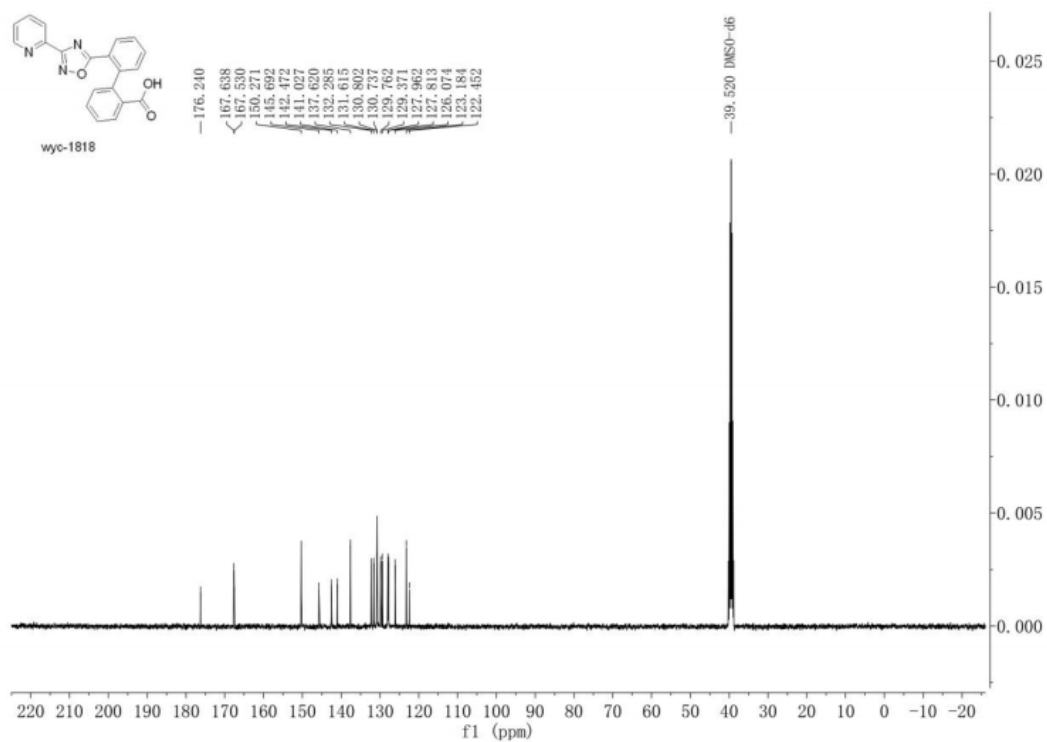

Compound **B13**:

HR-ESI-MS:

WYC-1809 #33 RT: 0.19 AV: 1 NL: 6.50E9  
T: FTMS + pESI Full ms [100.0000-1500.0000]

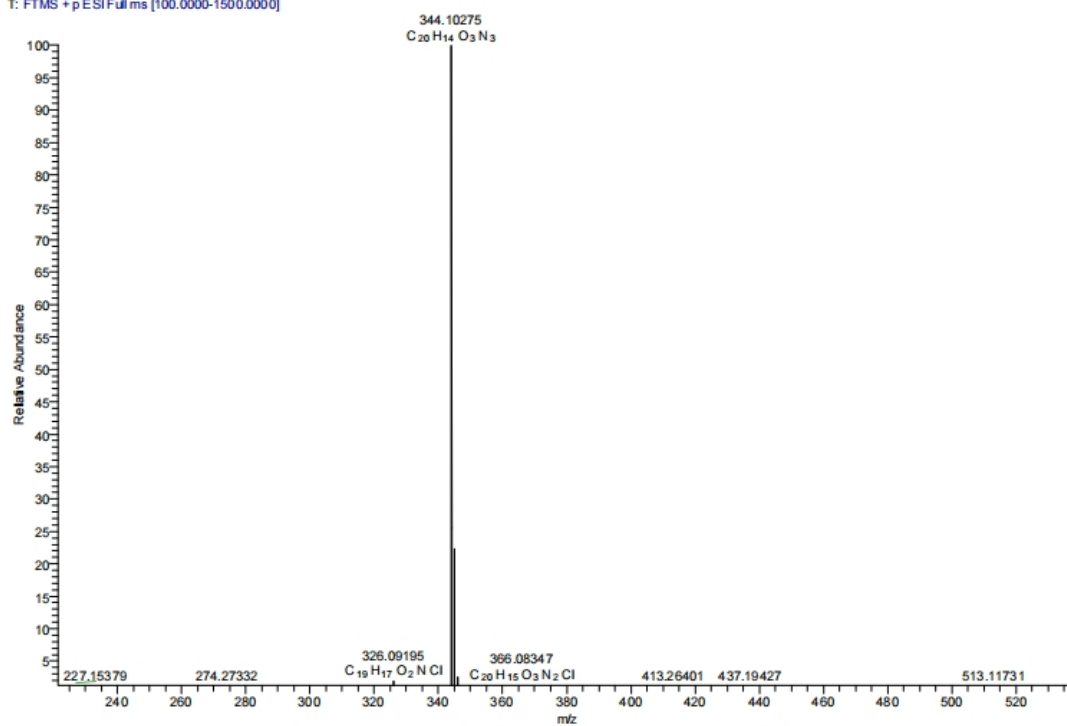

$^1\text{H}$ -NMR:

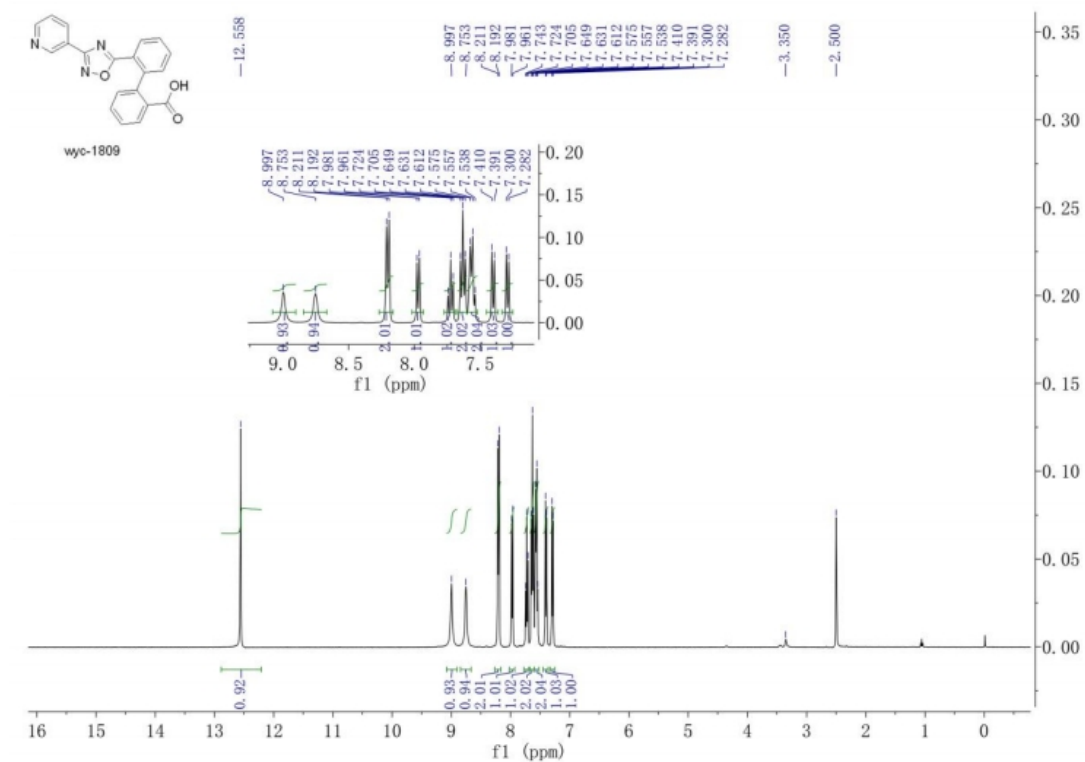

$^{13}\text{C}$ -NMR:

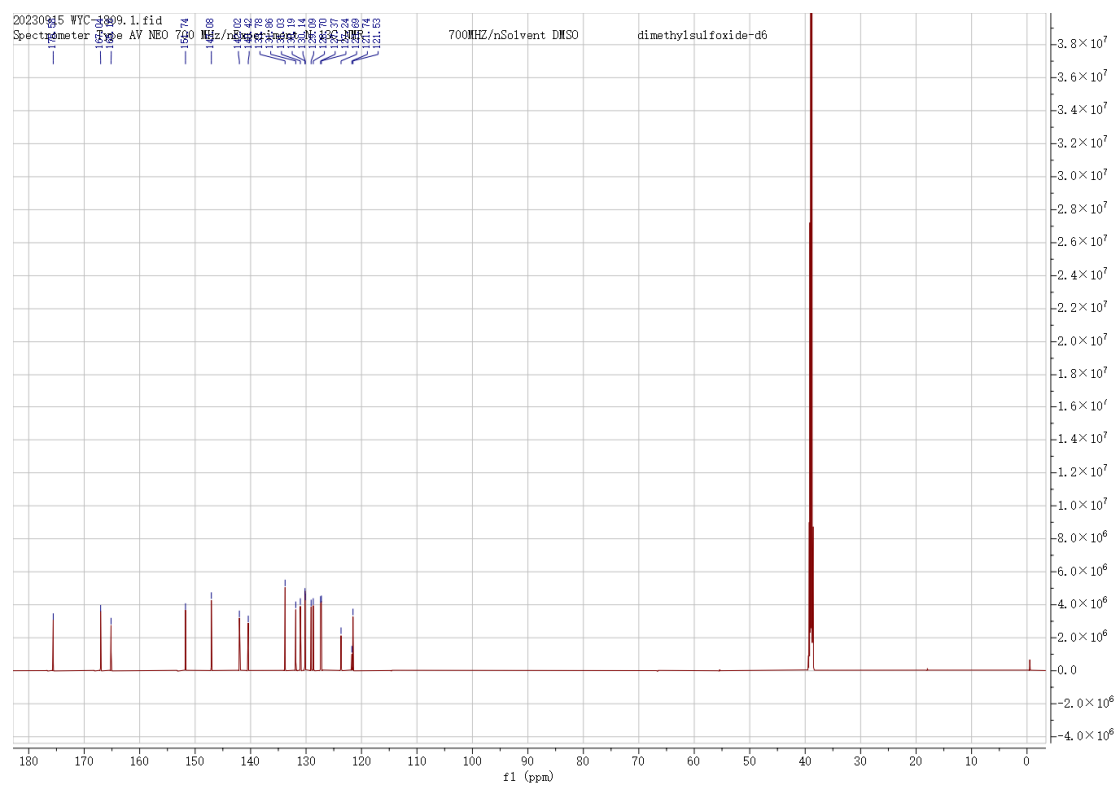

Compound **B14**:

HR-ESI-MS:

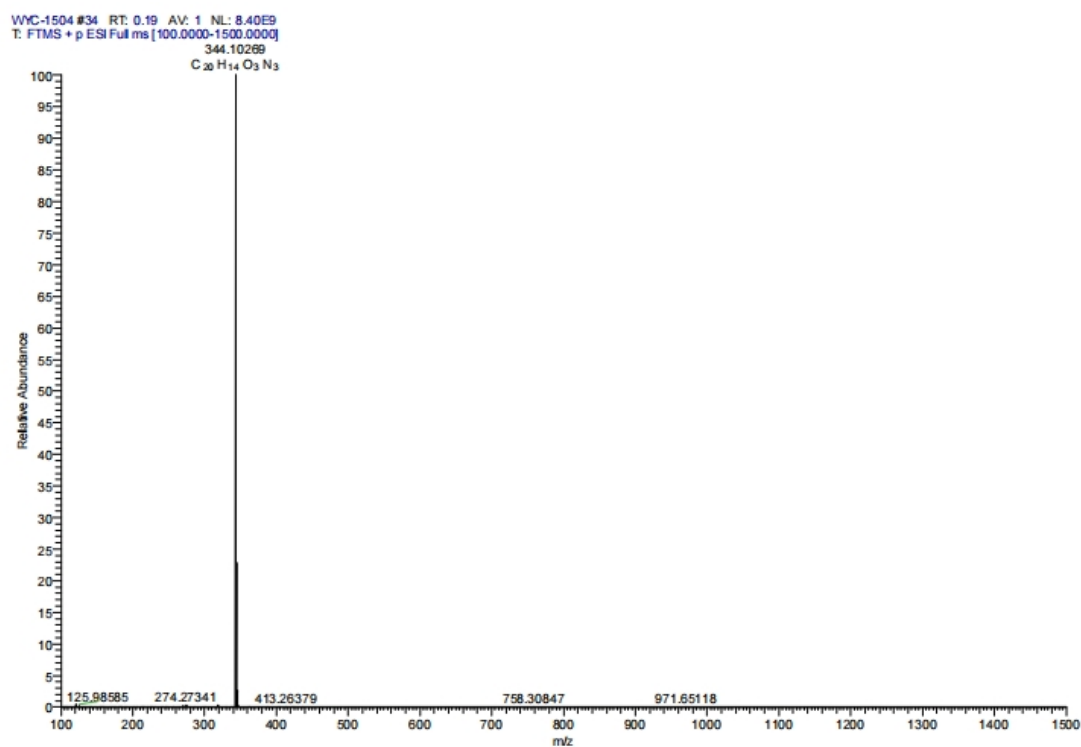

<sup>1</sup>H-NMR:

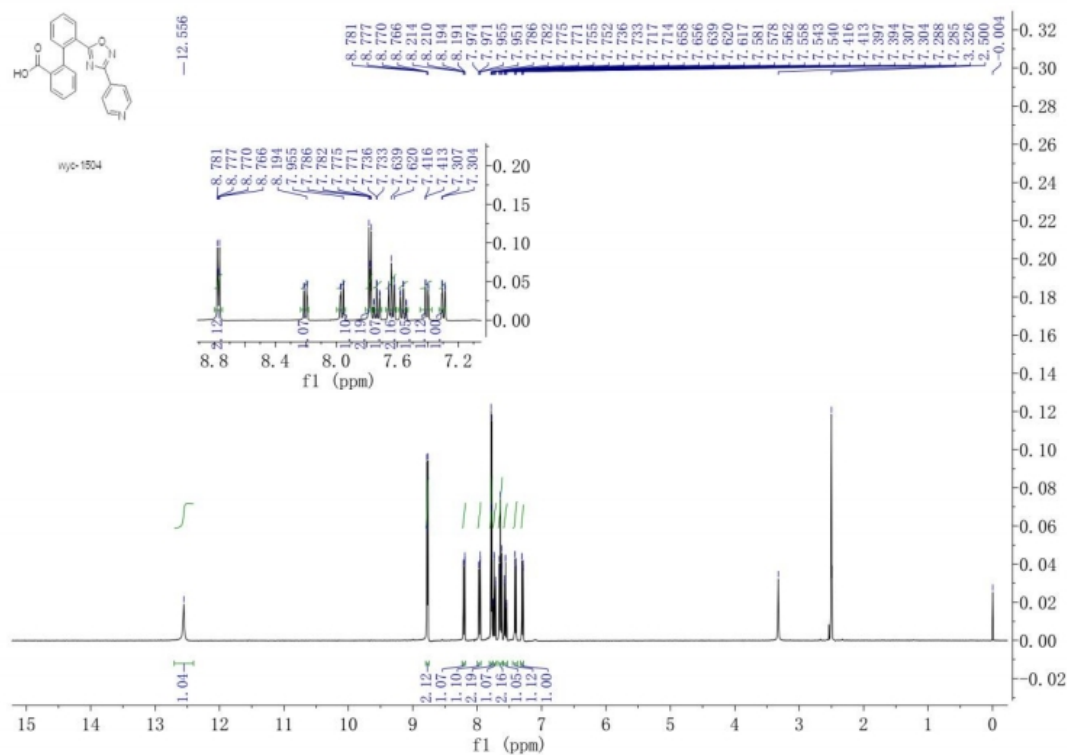



$^{13}\text{C}$ -NMR:

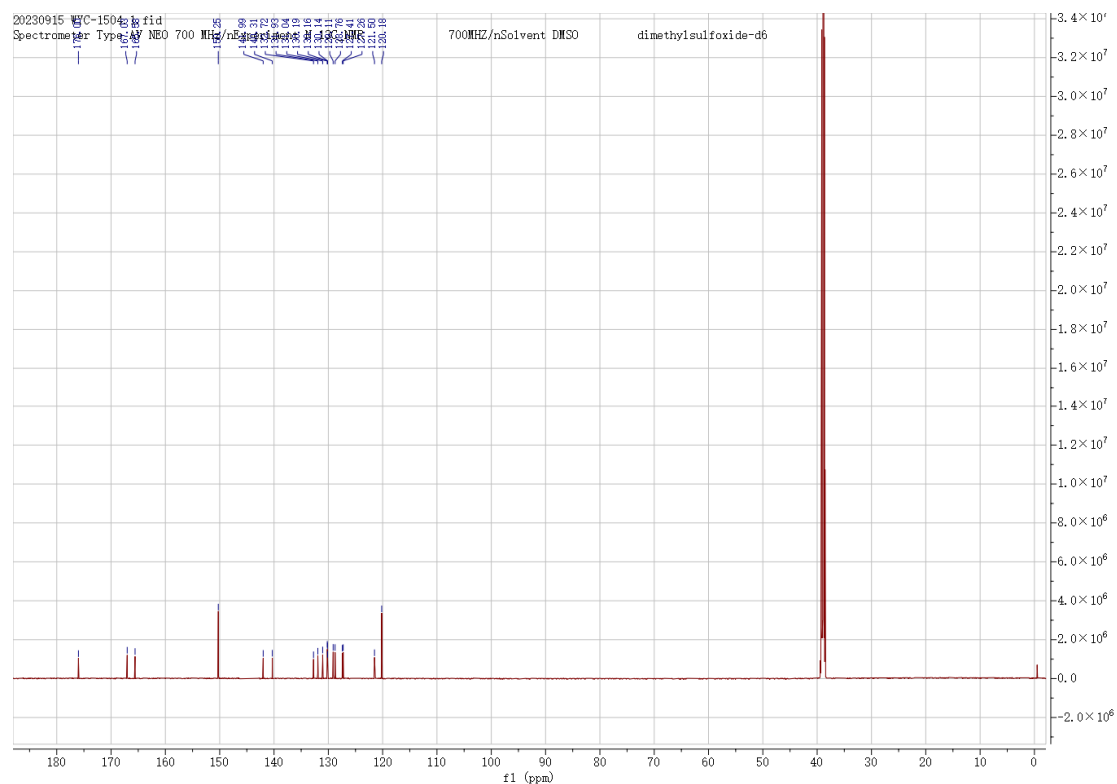

Compound **B15**:

HR-ESI-MS:

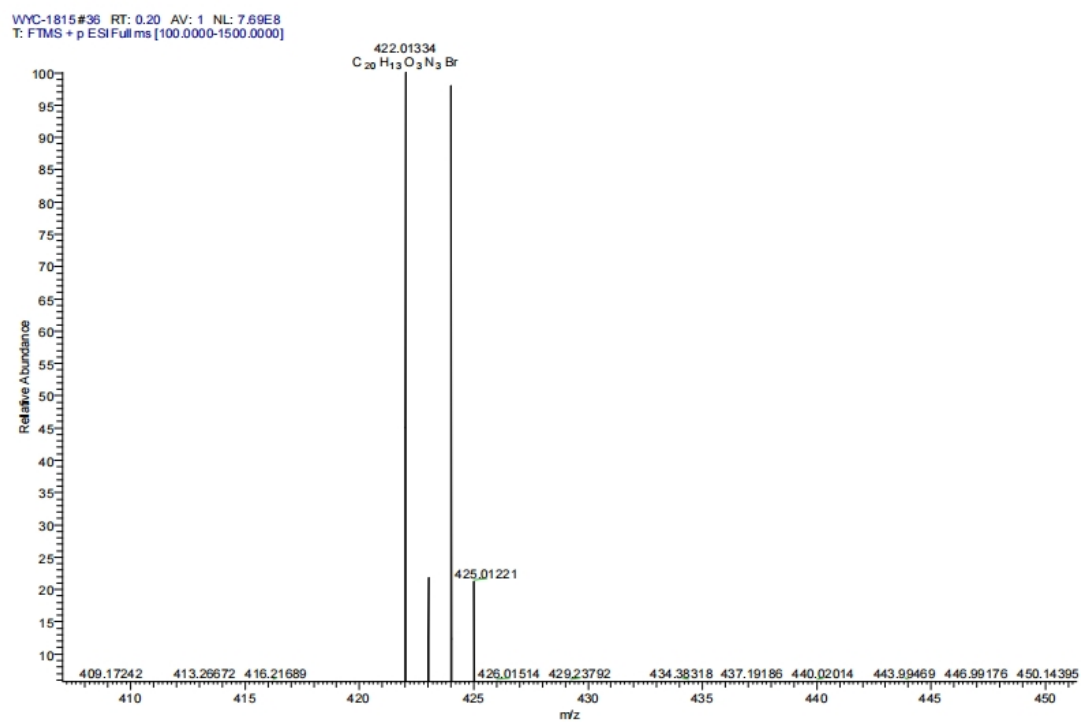

$^1\text{H}$ -NMR:

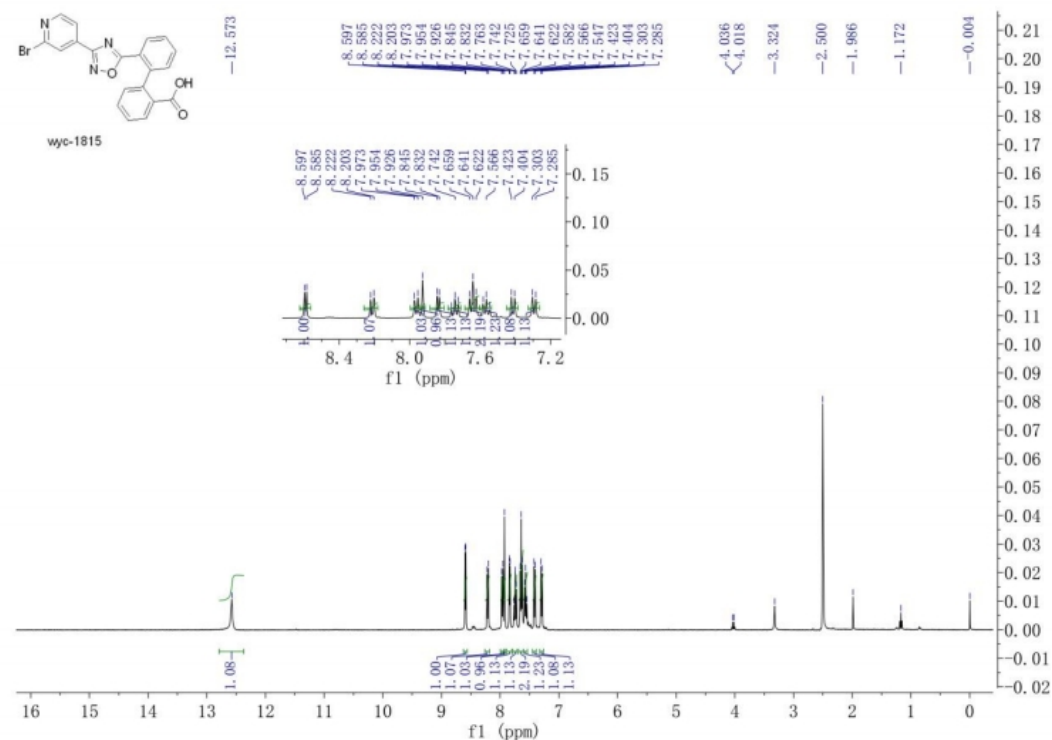

$^{13}\text{C}$ -NMR:

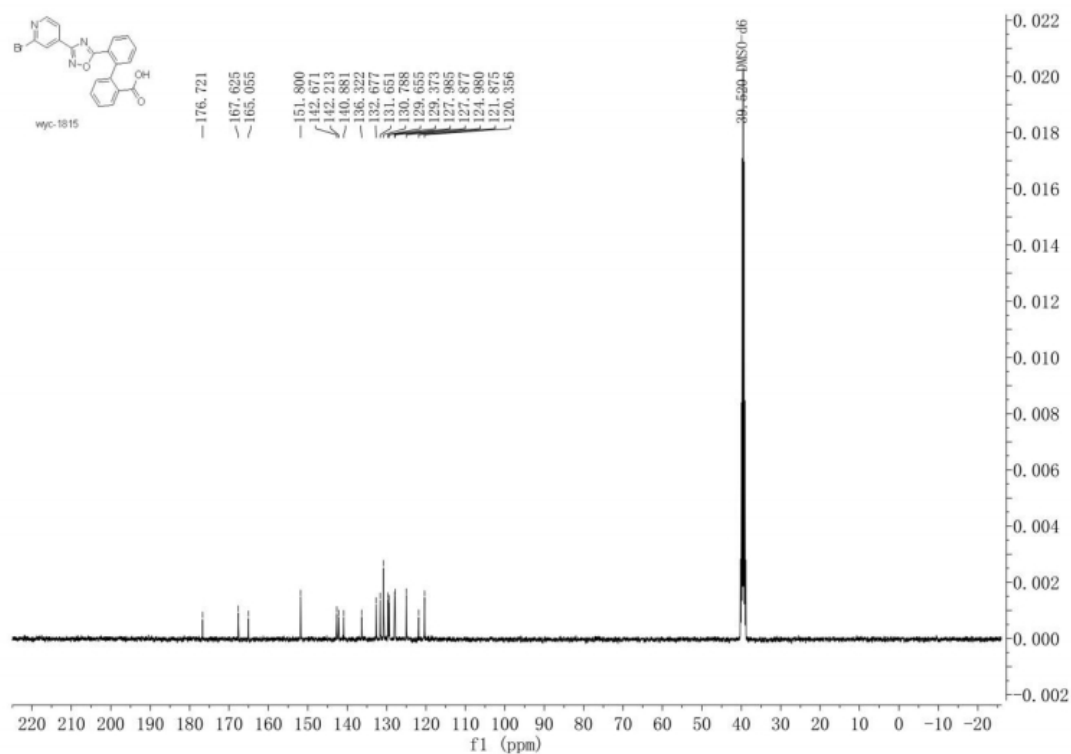

## Compound B16:

### HR-ESI-MS:

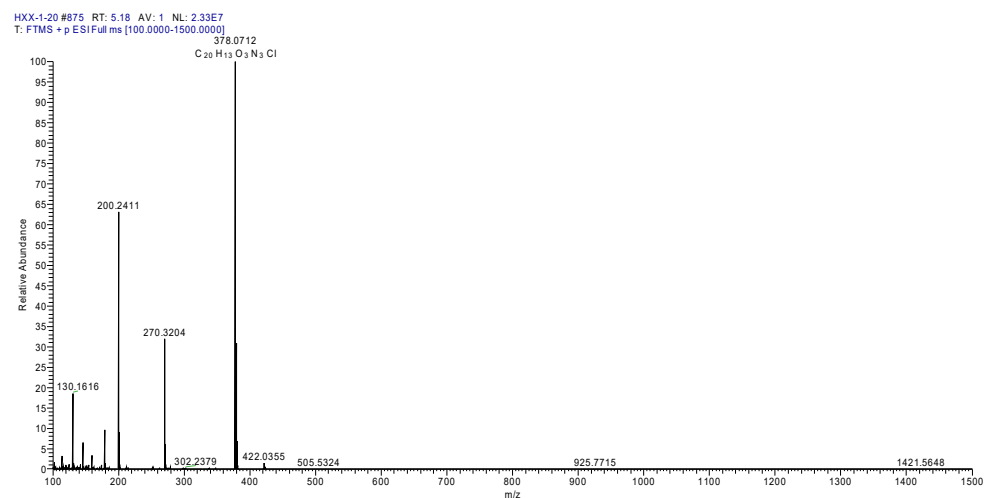

### $^1H$ -NMR:

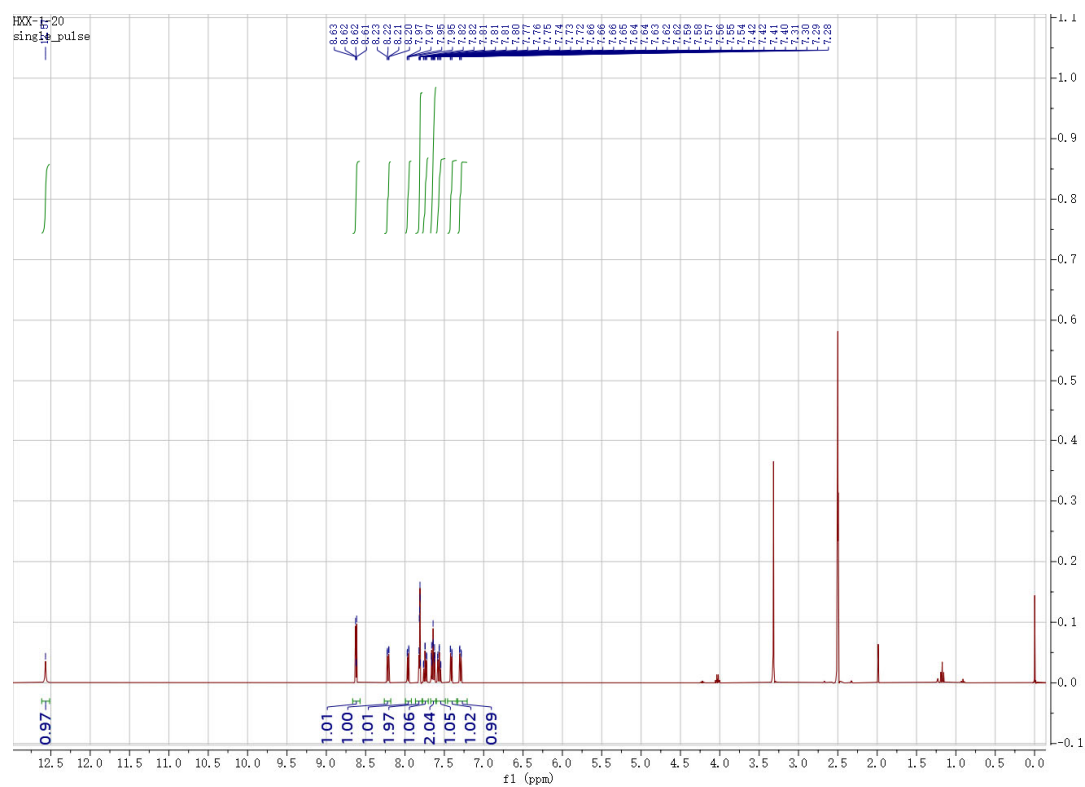

## $^{13}\text{C}$ -NMR:

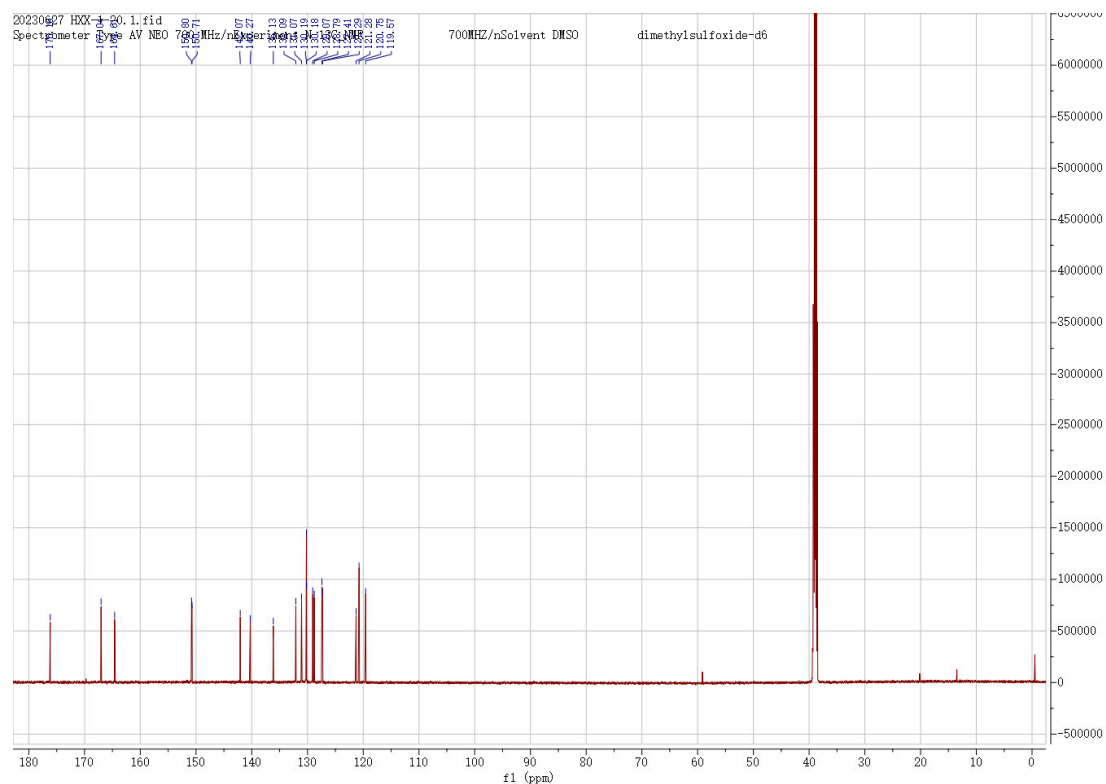

## Compound **B17**:

## HR-ESI-MS:

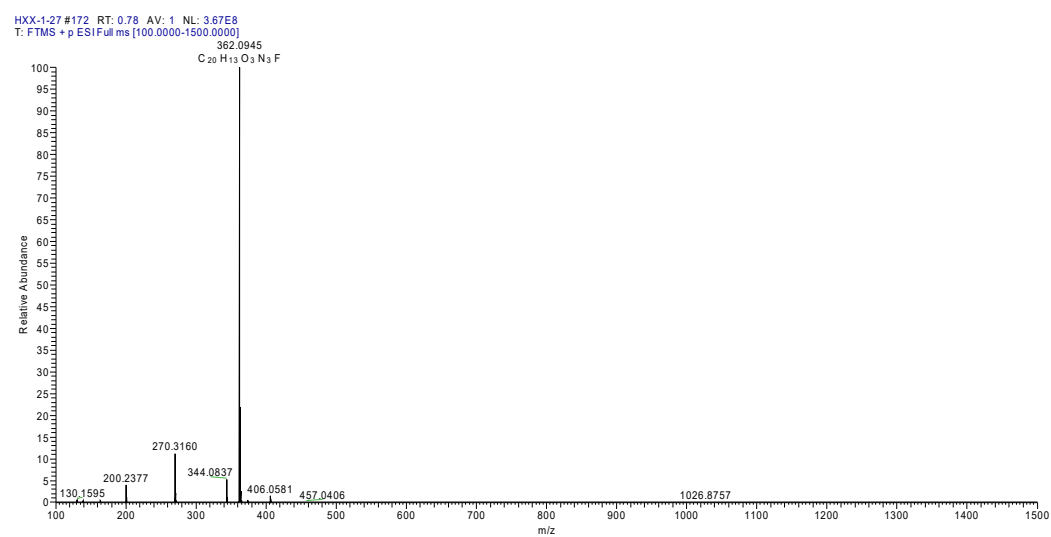

$^1\text{H}$ -NMR:

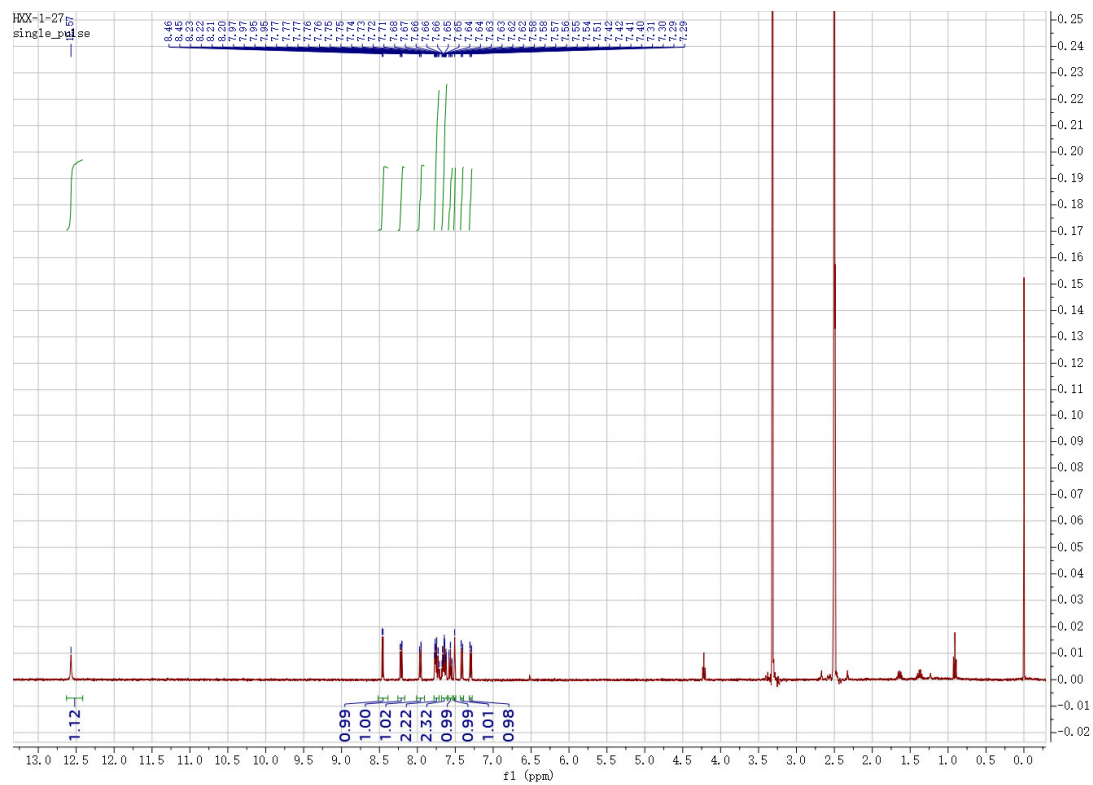

$^{13}\text{C}$ -NMR:

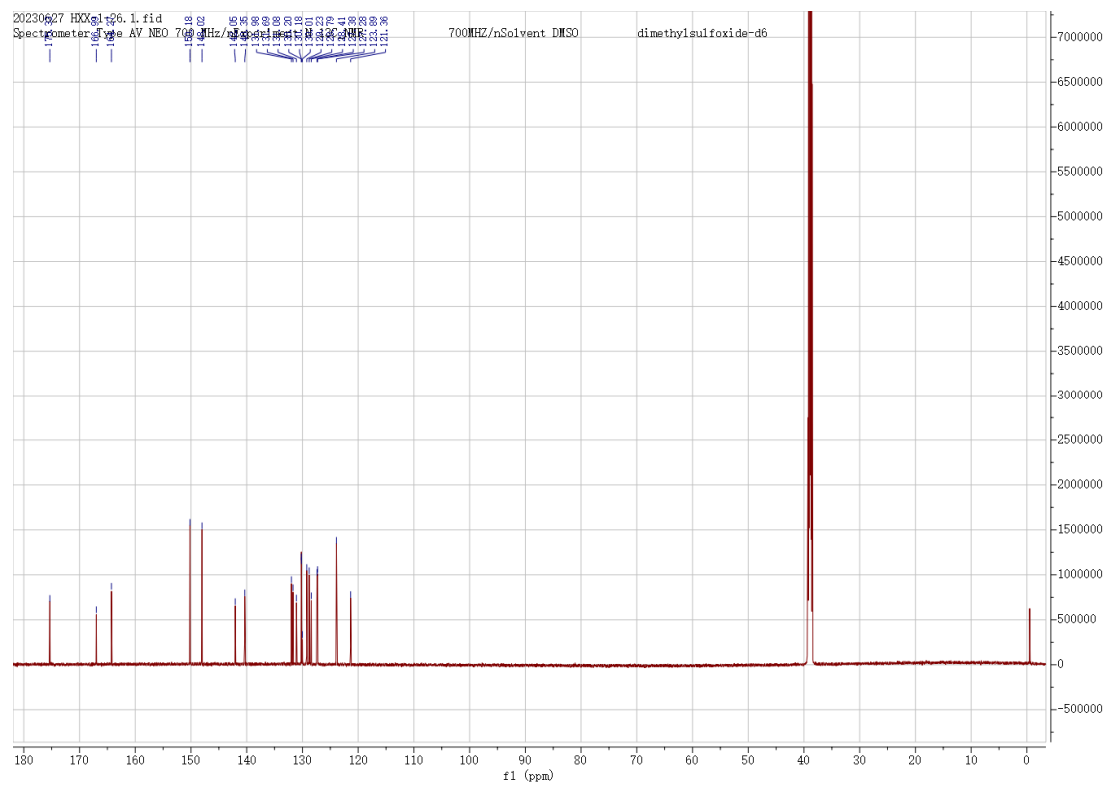

HR-ESI-MS:

HXX-1-28 #88 RT: 0.31 AV: 1 NL: 1.05E9  
T: FTMS + p ESI Full ms [100.0000-1500.0000]

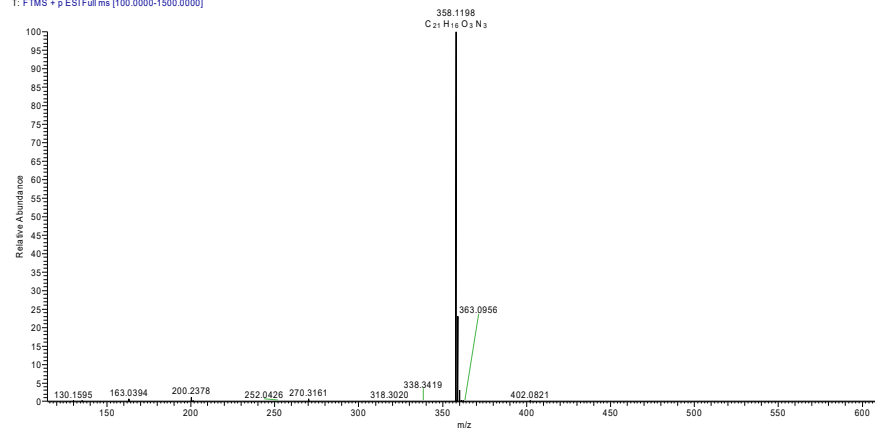<sup>1</sup>H-NMR: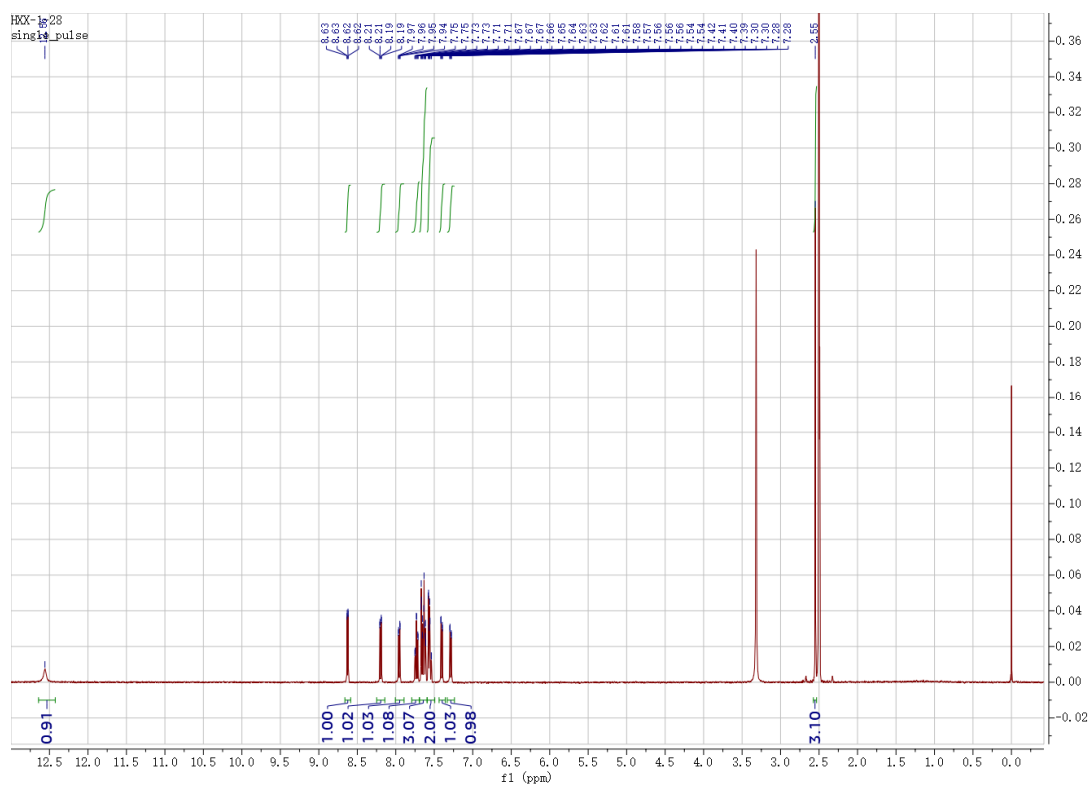

$^{13}\text{C}$ -NMR:

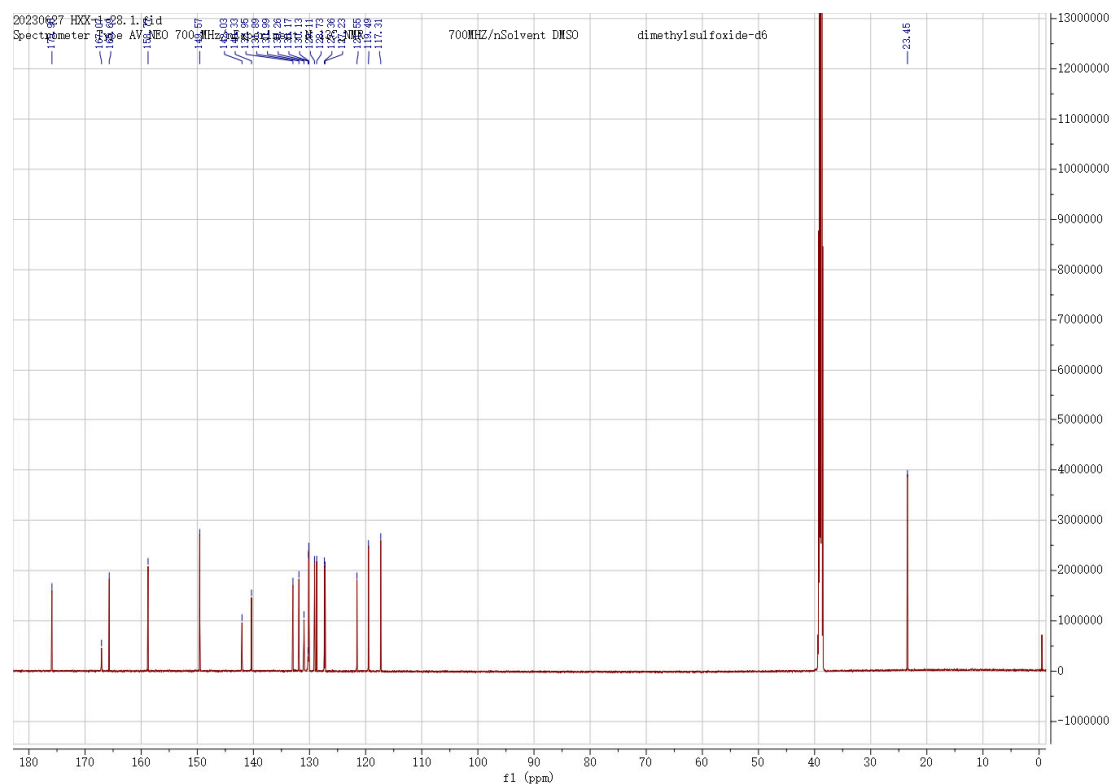

Compound **B19**:

HR-ESI-MS:

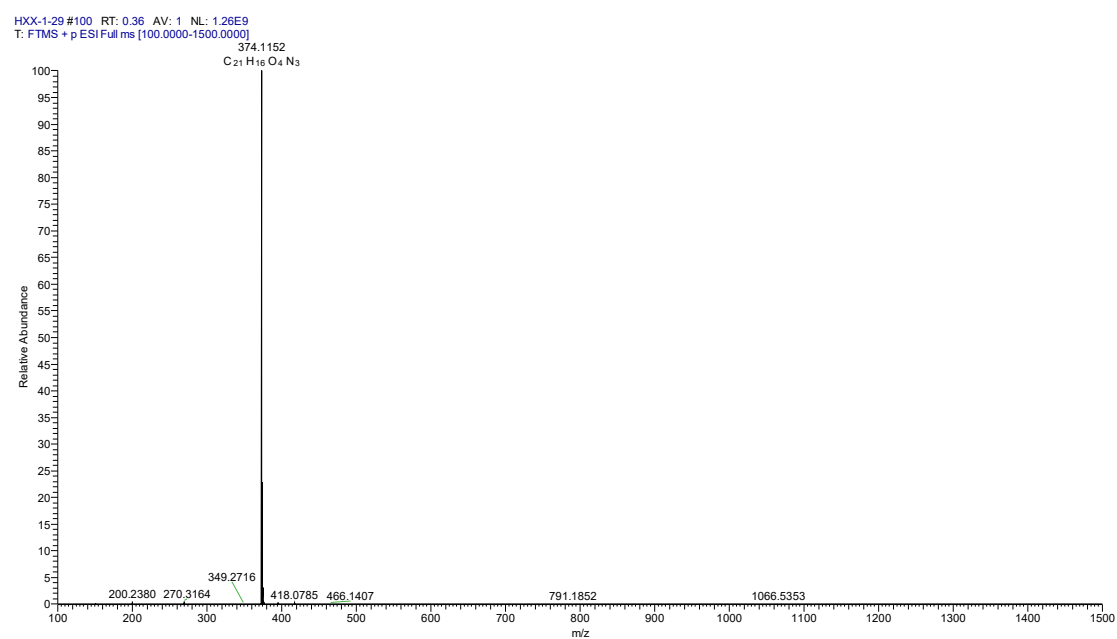

# <sup>1</sup>H-NMR:

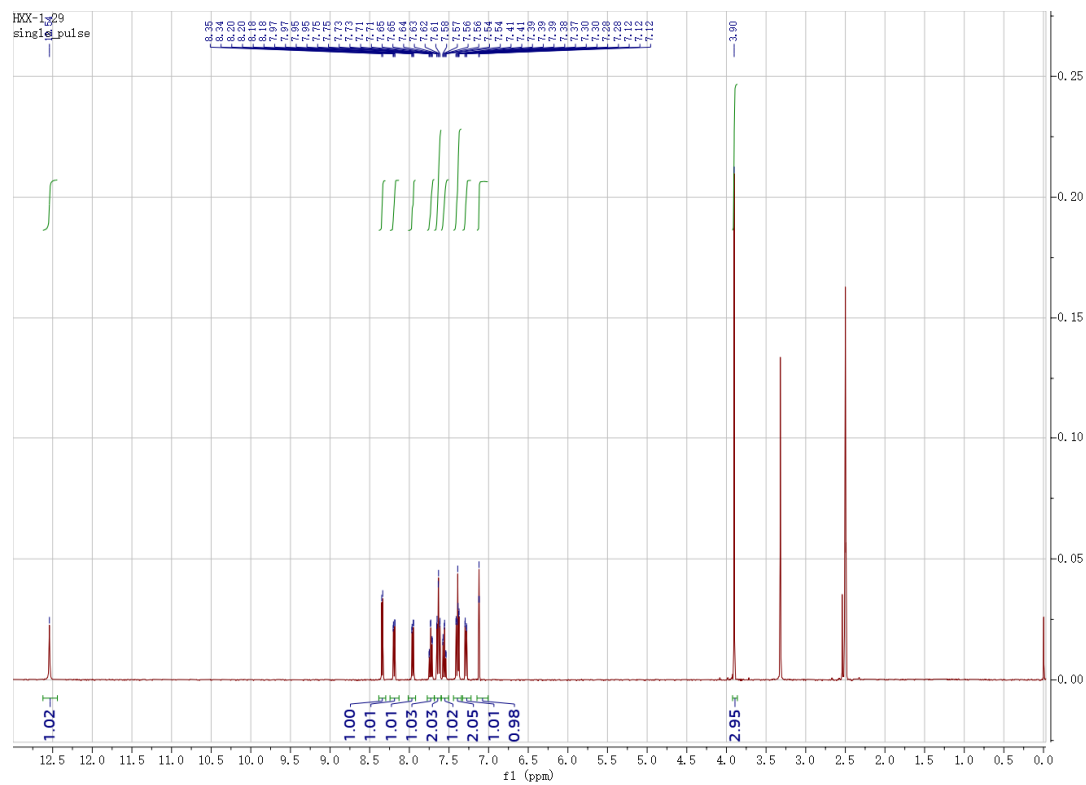

# <sup>13</sup>C-NMR:

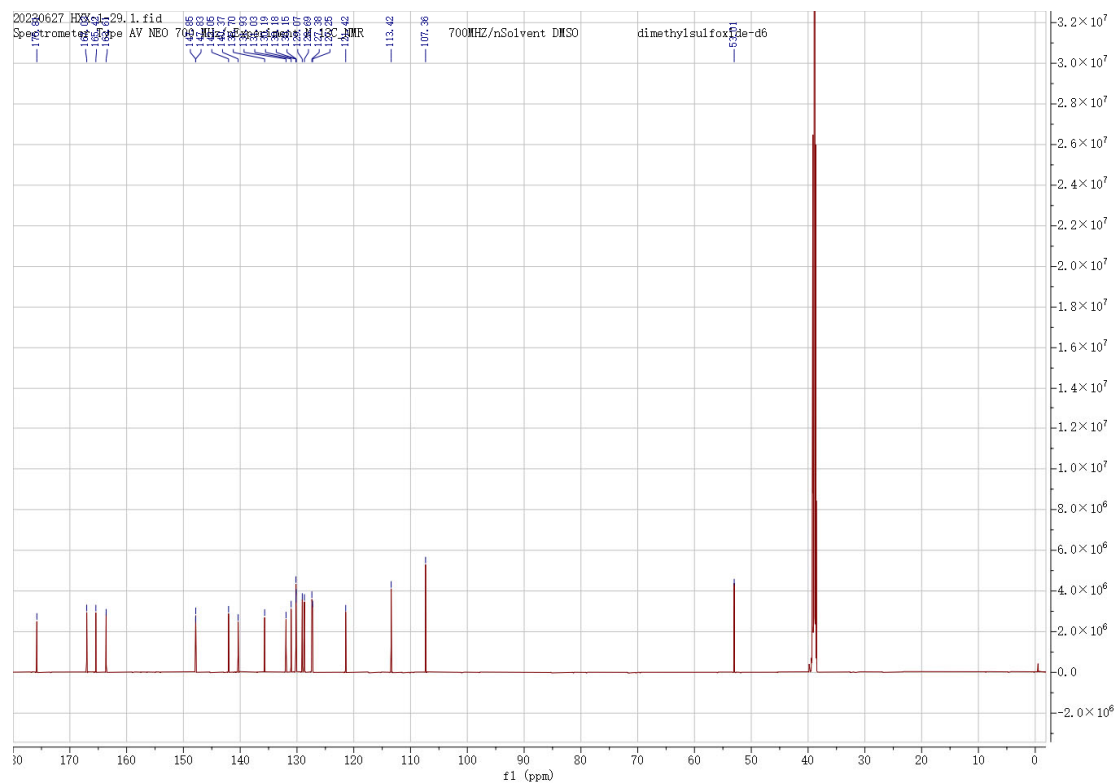



## Compound B20:

### HR-ESI-MS:

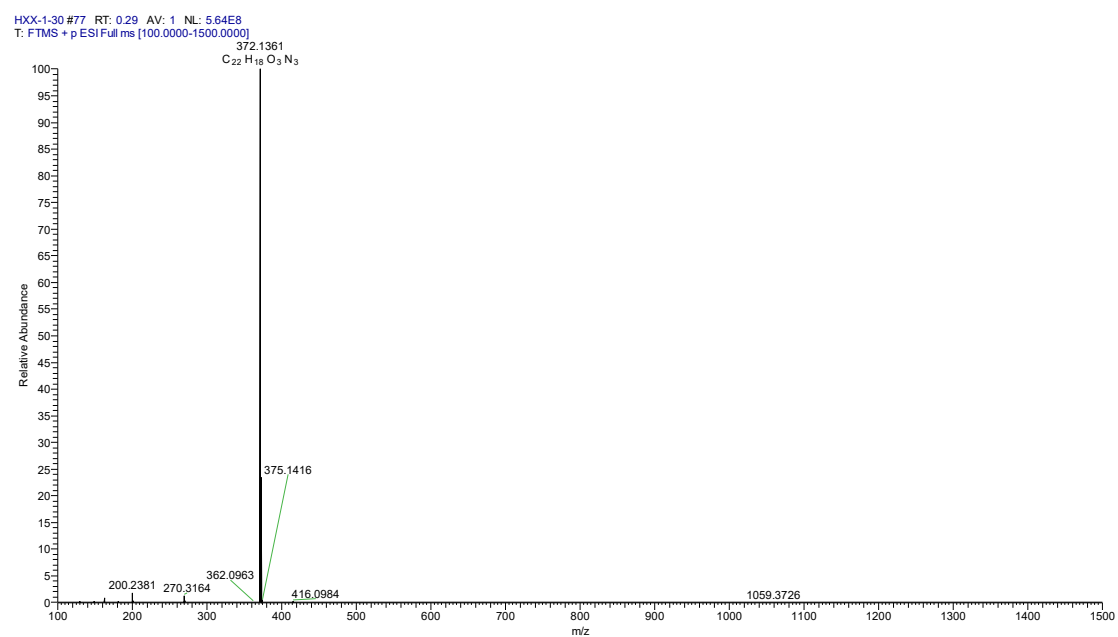

### <sup>1</sup>H-NMR:

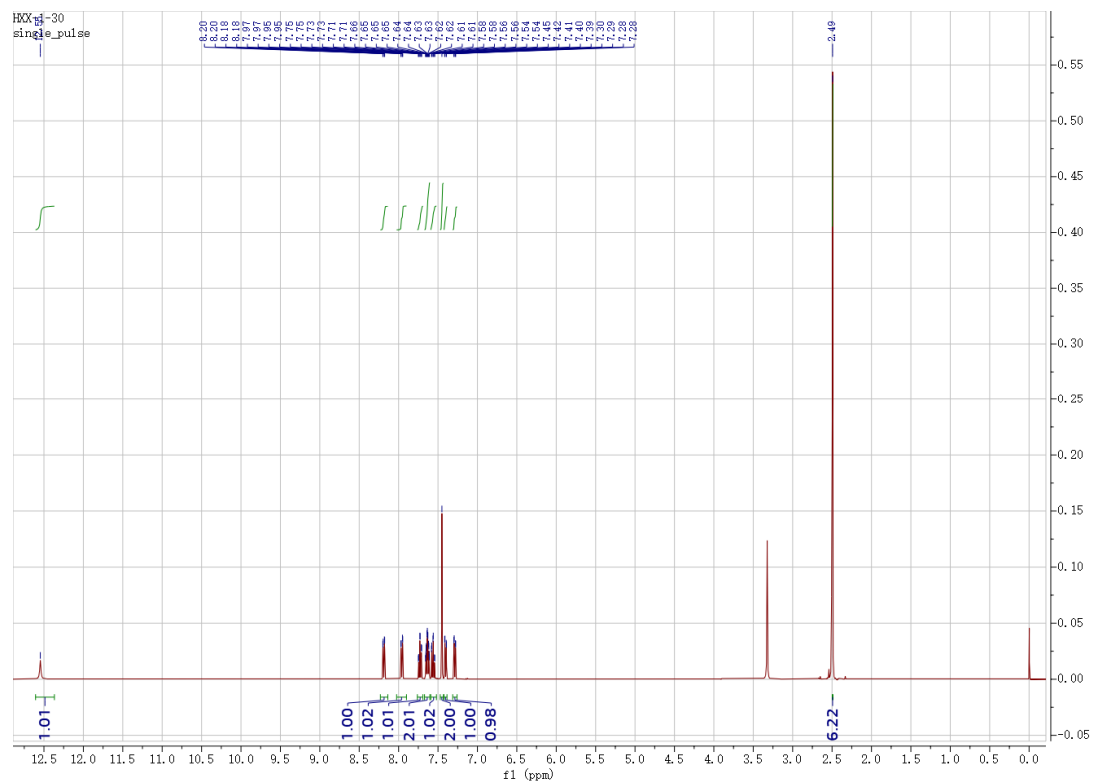

<sup>13</sup>C-NMR: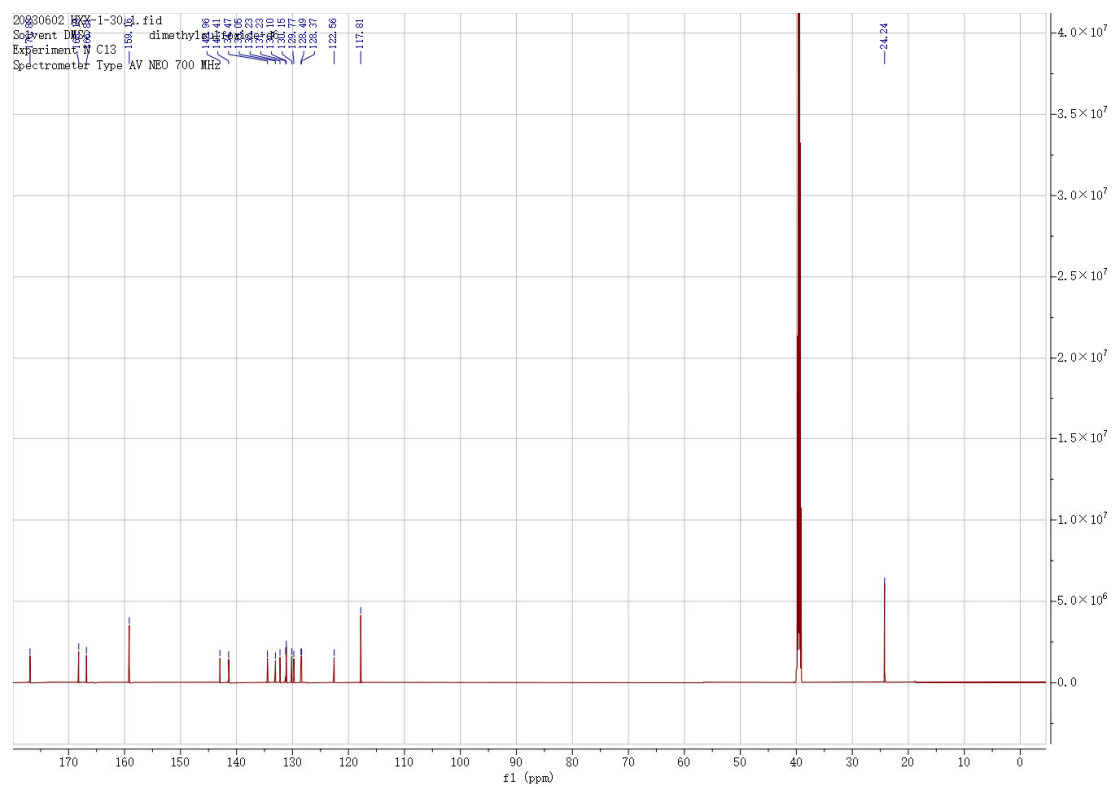

Compound **B21**:

HR-ESI-MS:

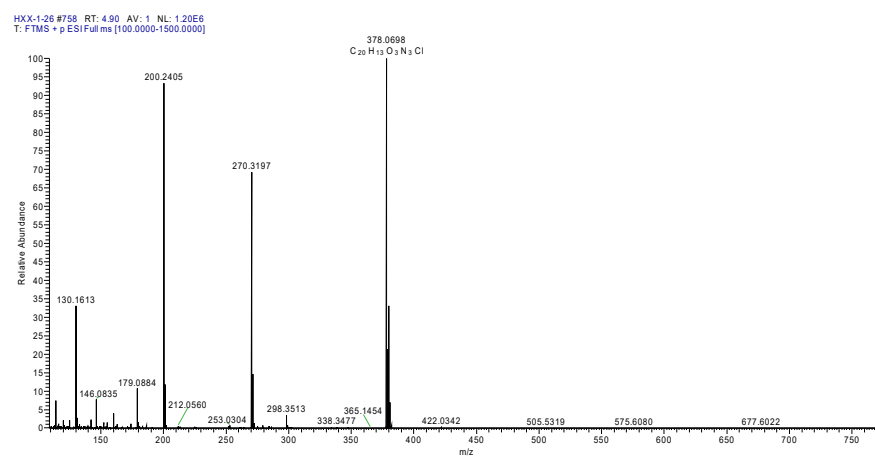

$^1\text{H}$ -NMR:

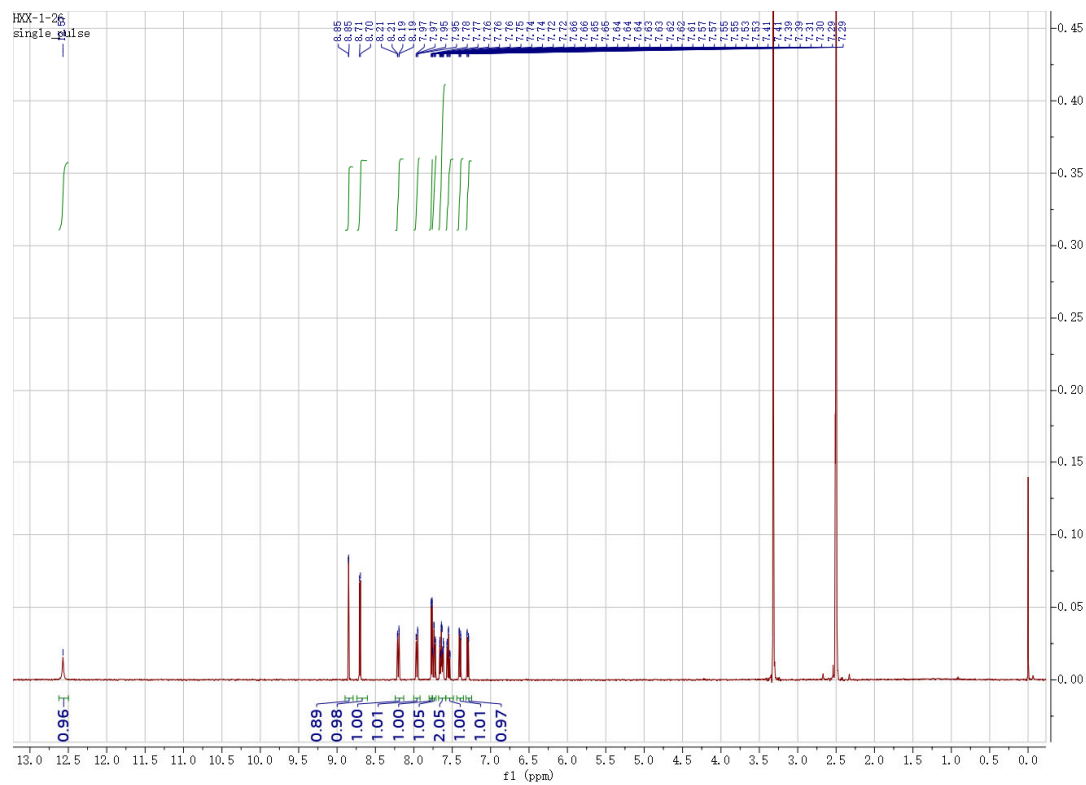

$^{13}\text{C}$ -NMR:

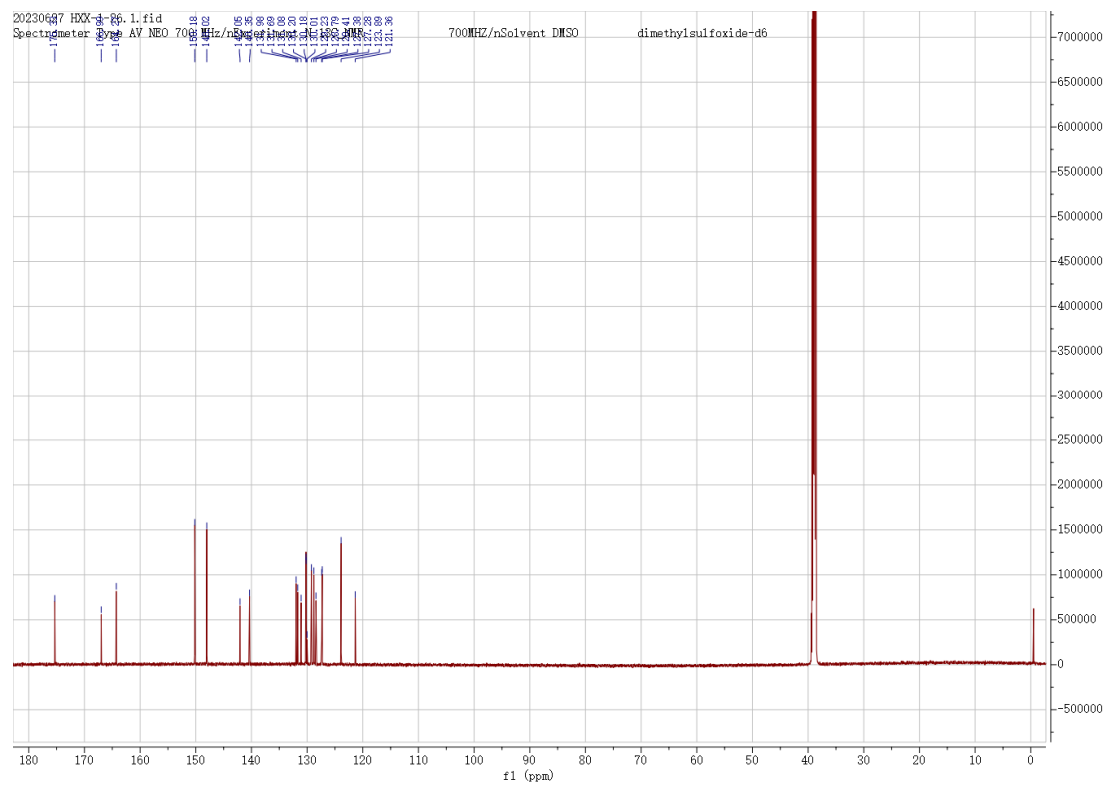

## Compound B22:

### HR-ESI-MS:

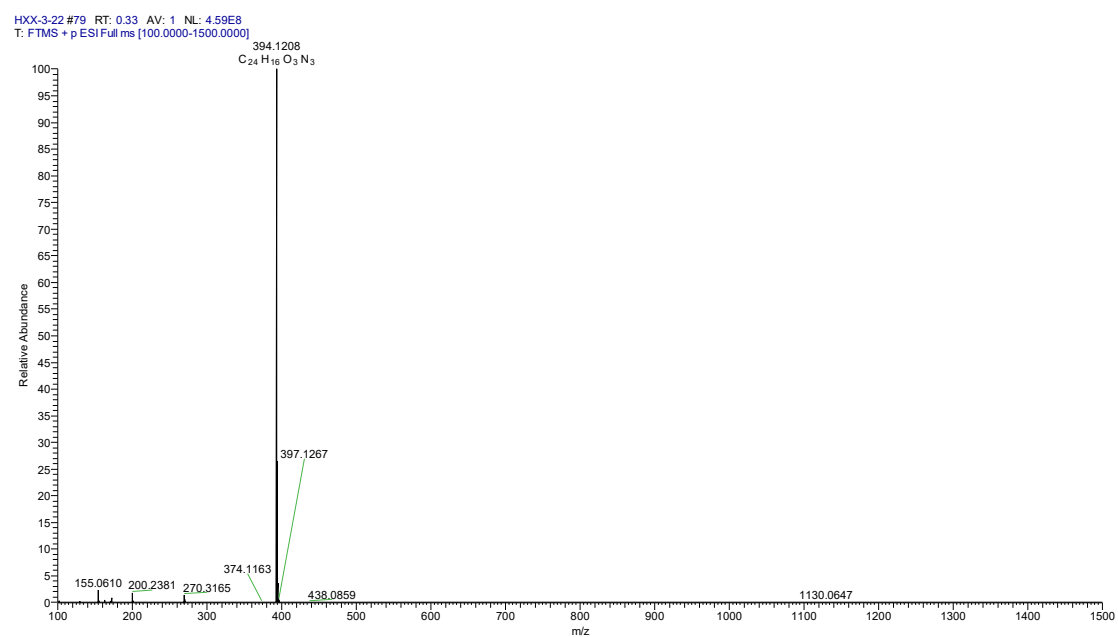

### $^1H$ -NMR:

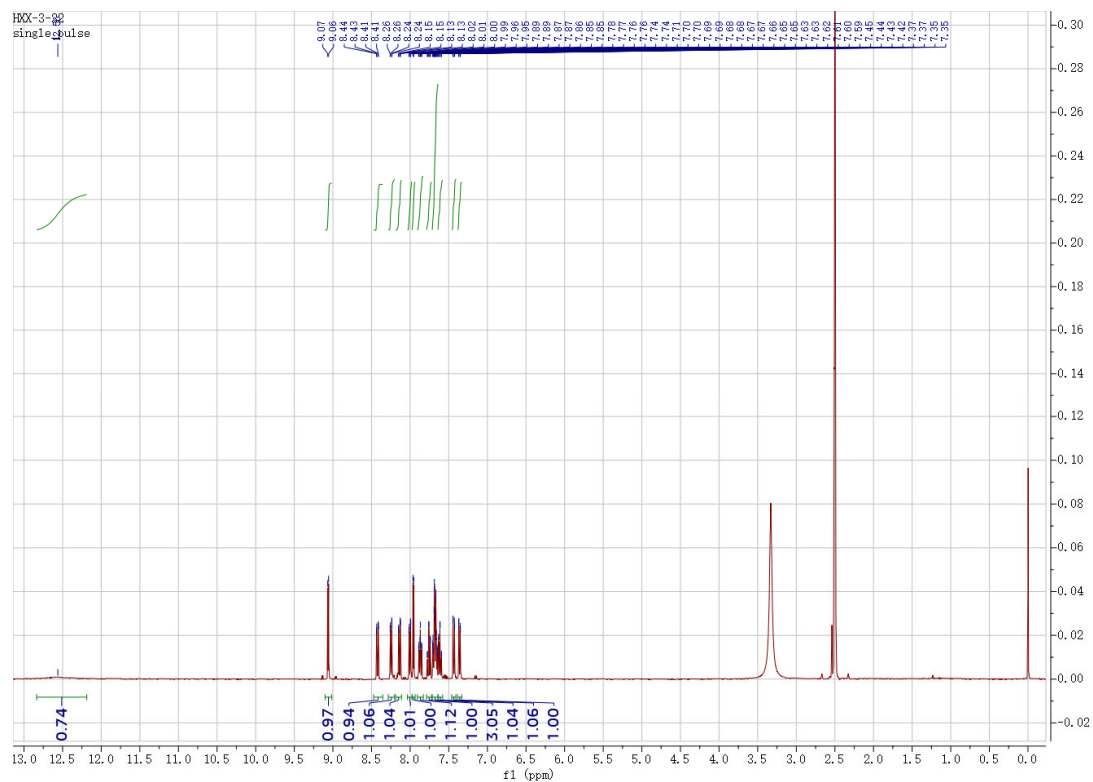

$^{13}\text{C}$ -NMR:

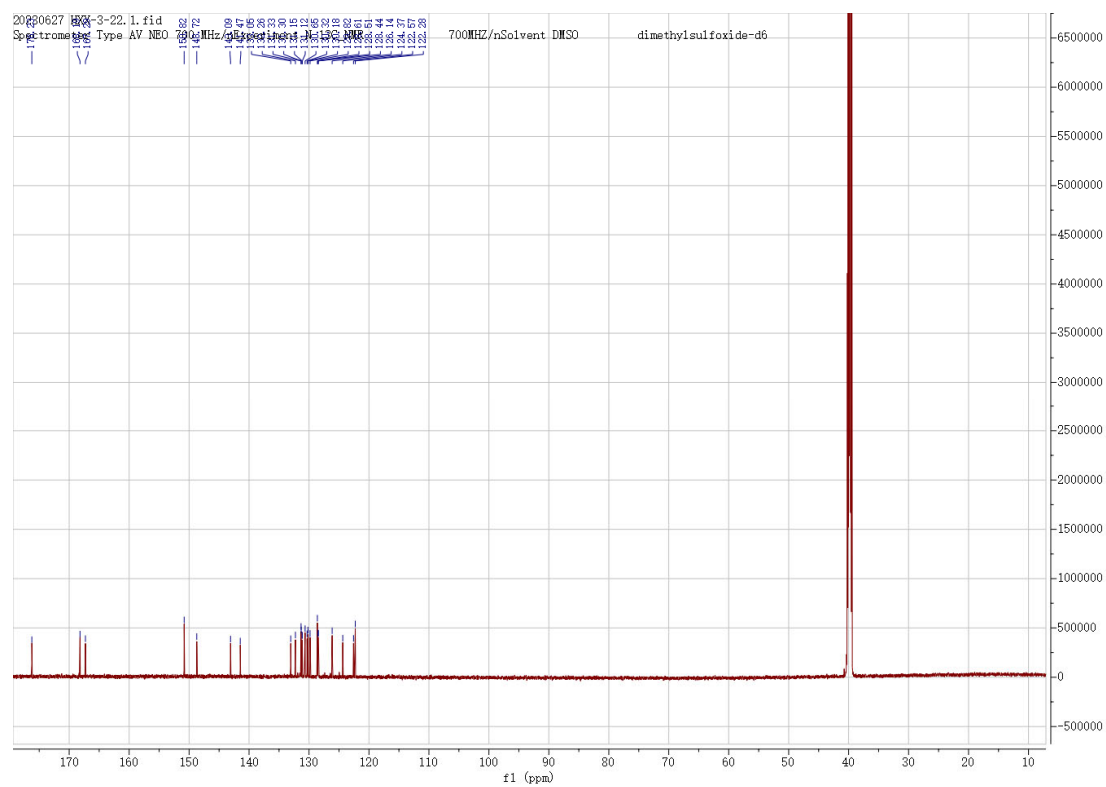

Compound **B23**:

HR-ESI-MS:

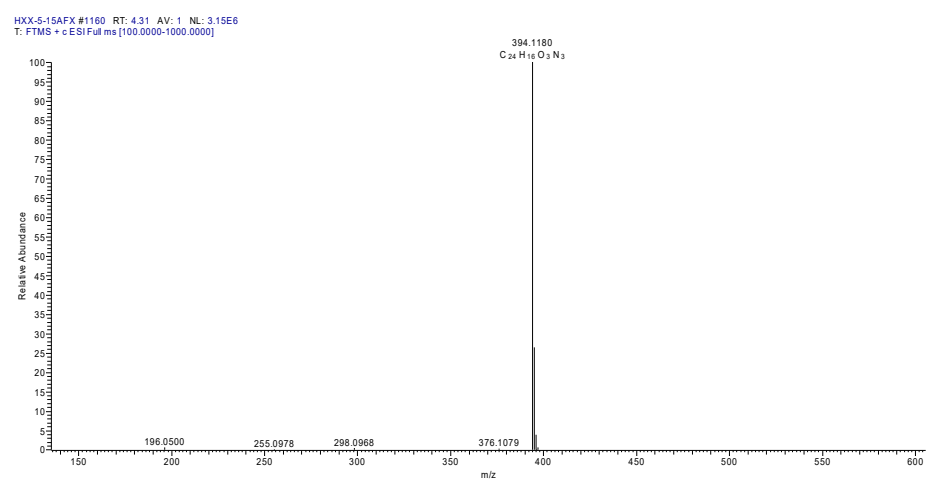

# <sup>1</sup>H-NMR:

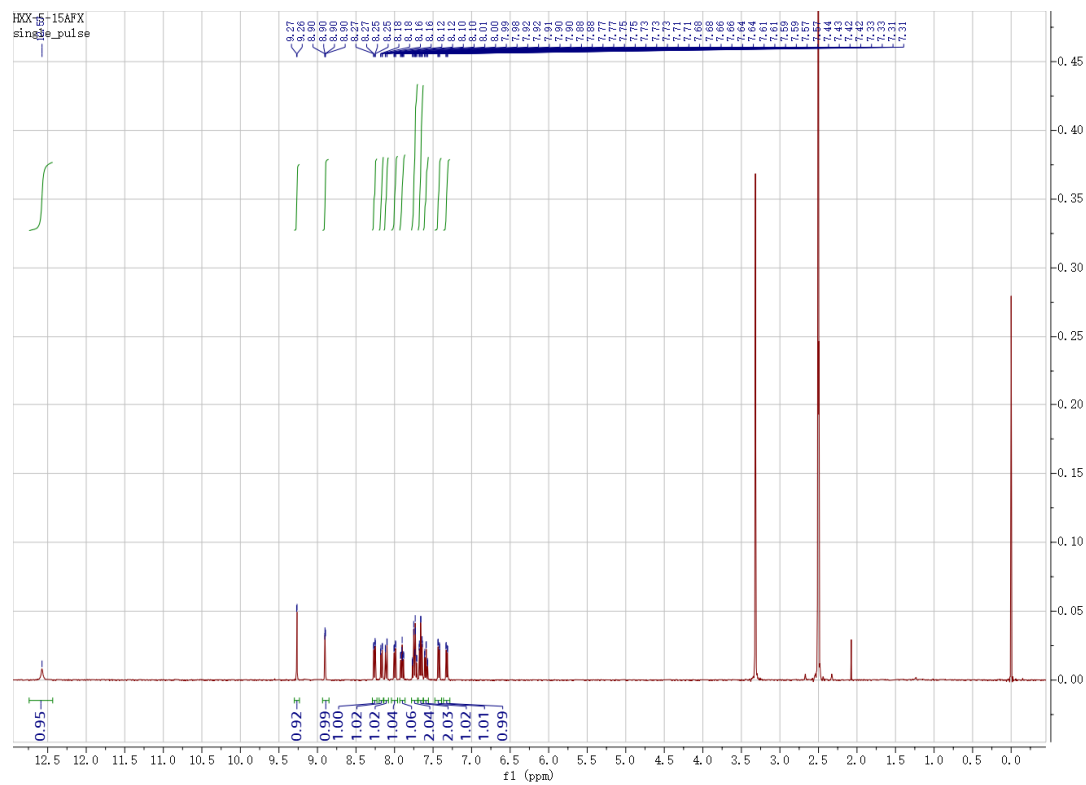

# <sup>13</sup>C-NMR:

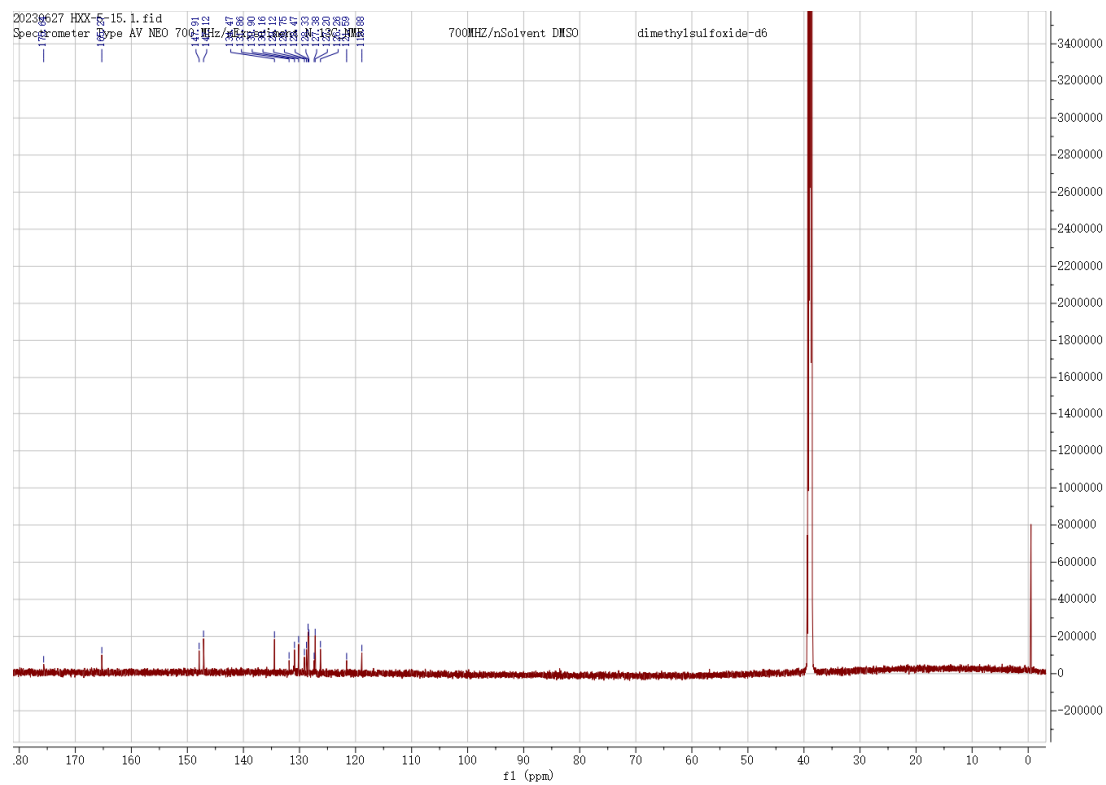

## Compound B24:

## HR-ESI-MS:

HXX-7-2 #66 RT: 0.31 AV: 1 NL: 2.38E8  
T: FTMS +p ESI Full ms [100.0000-1500.0000]

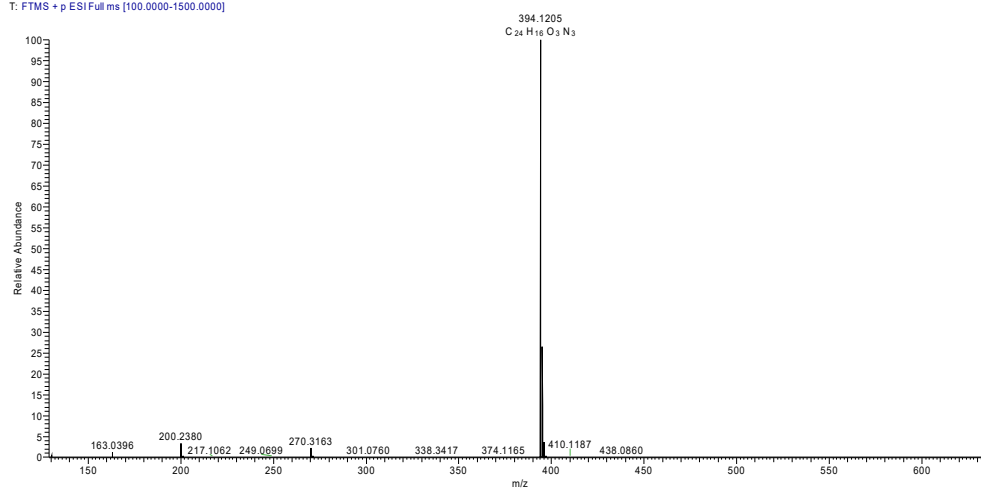

## <sup>1</sup>H-NMR:

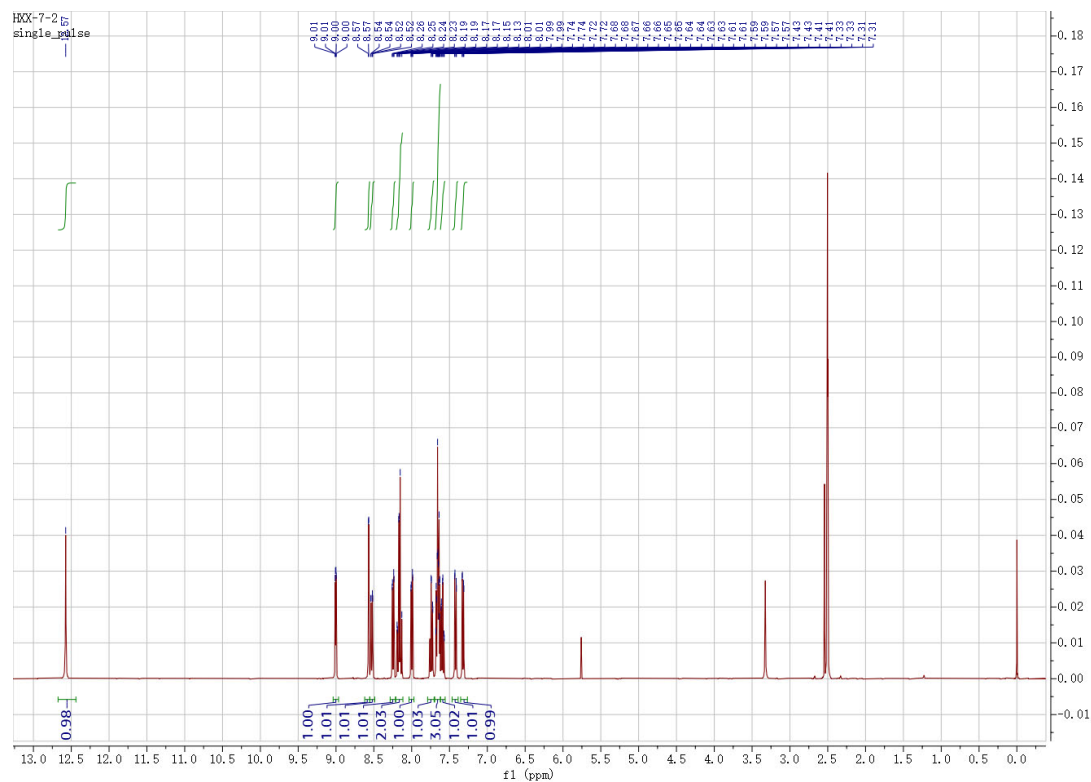

<sup>13</sup>C-NMR:

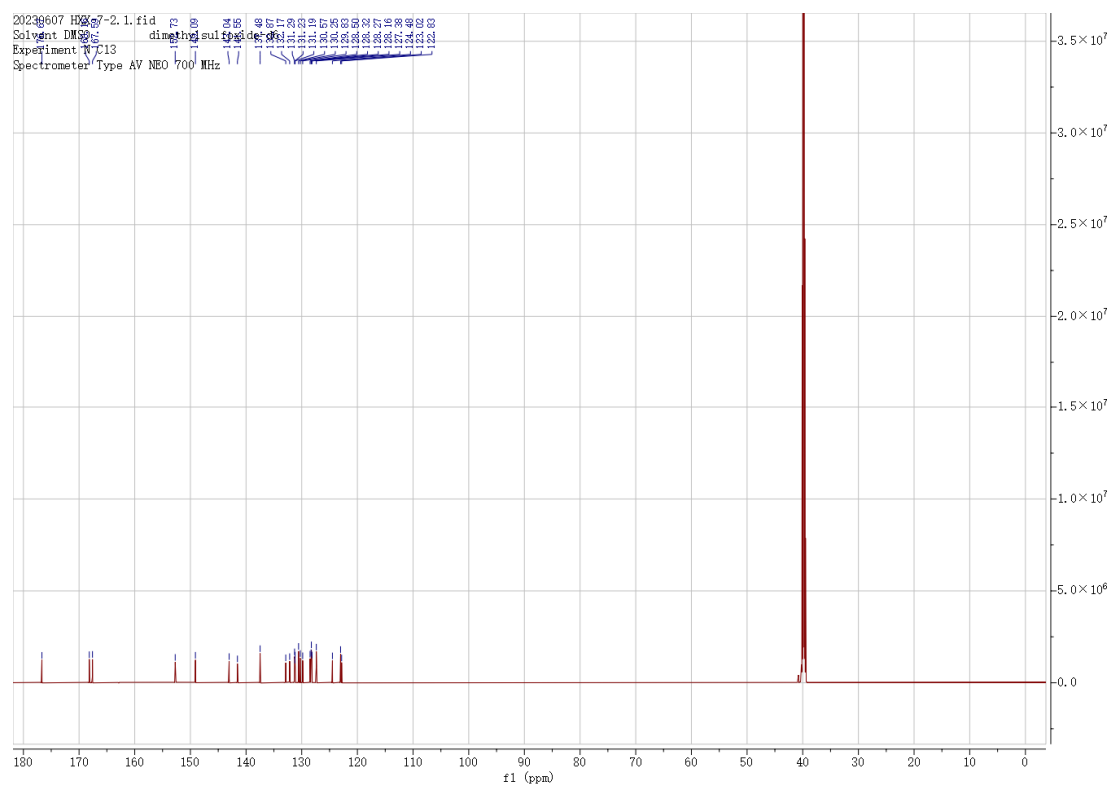

Compound **B25**:

HR-ESI-MS:

HXX-7-19N\_210122102310 #1556 RT: 5.78 AV: 1 NL: 2.10E7  
T: FTMS - e ESI Full ms [100.0000-1000.0000]

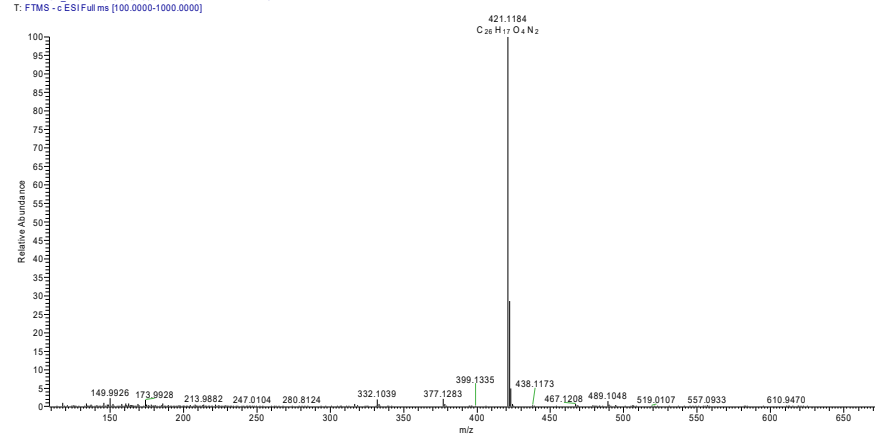



# <sup>1</sup>H-NMR:

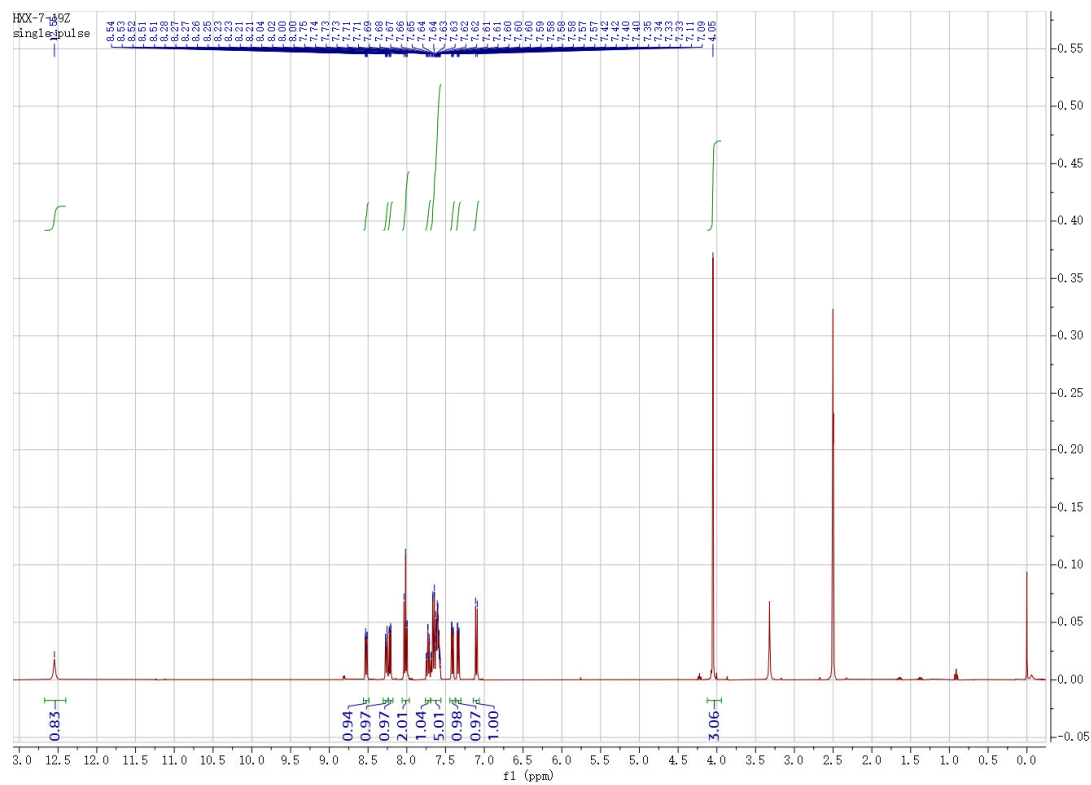

# <sup>13</sup>C-NMR:

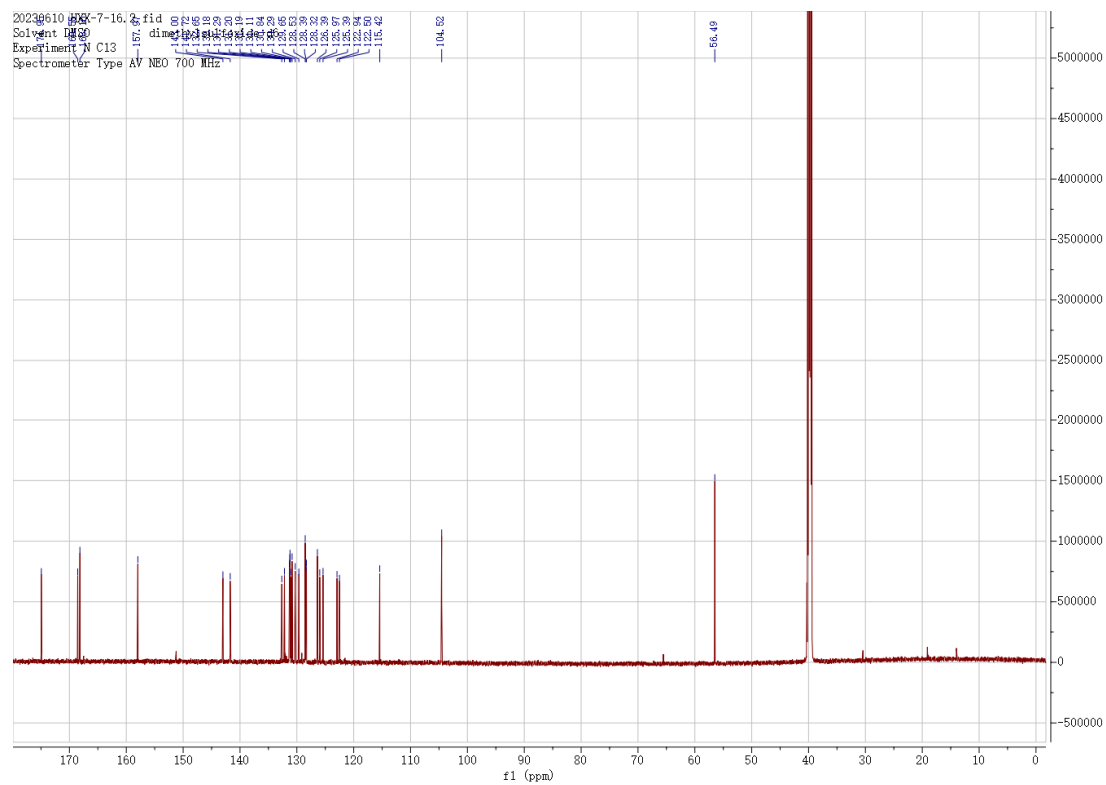

## Compound B26:

### HR-ESI-MS:

HXX-5-26 #60 RT: 0.35 AV: 1 NL: 6.03E7  
T: FTMS + p ESI Full ms [100.0000-1500.0000]

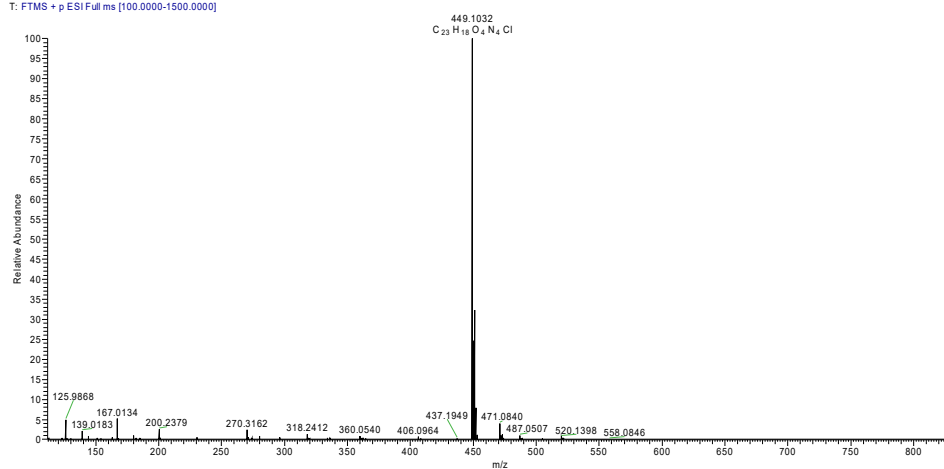

### <sup>1</sup>H-NMR:

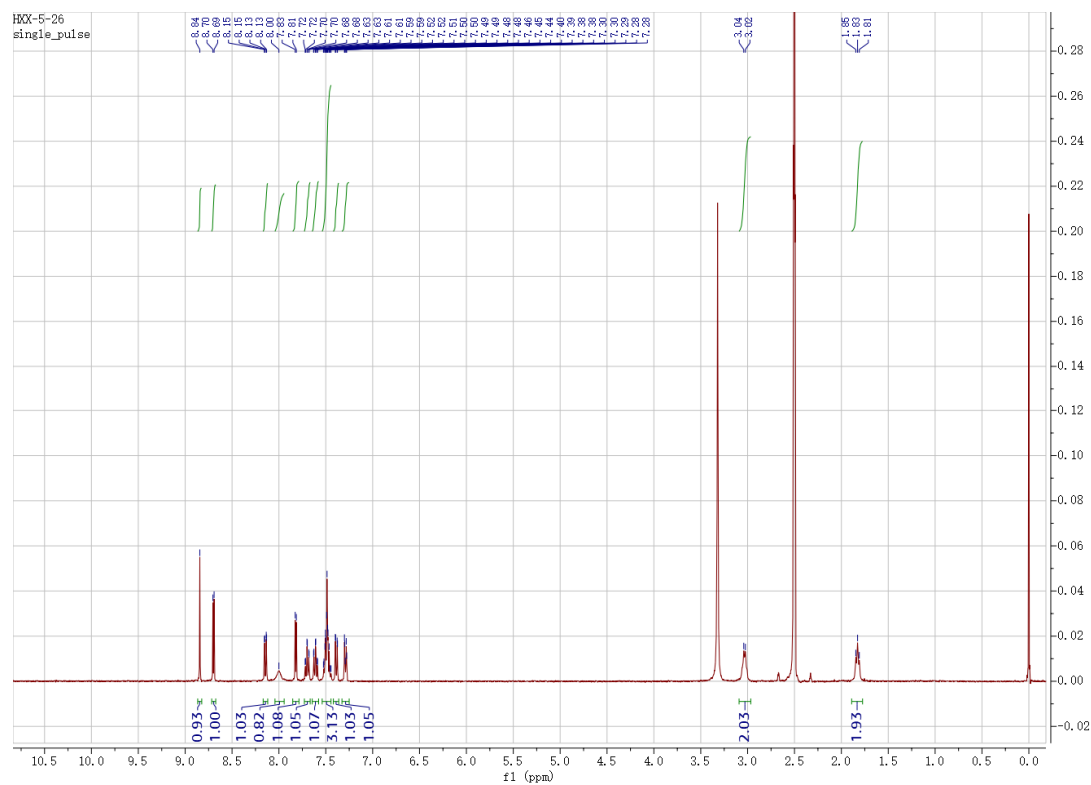

## $^{13}\text{C}$ -NMR:

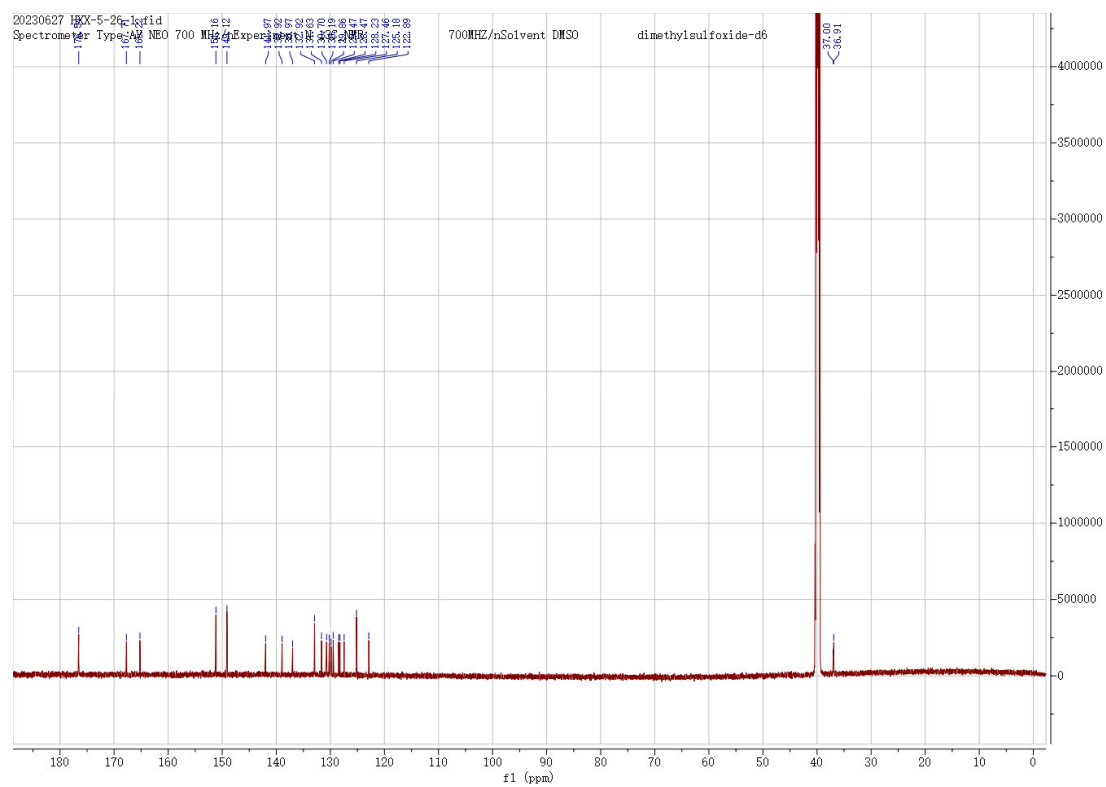

## Compound **B27**:

## HR-ESI-MS:

HXX-4-33 #52 RT: 0.32 AV: 1 NL: 1.02E6  
T: FTMS + p ESI Full ms [100.0000-1500.0000]

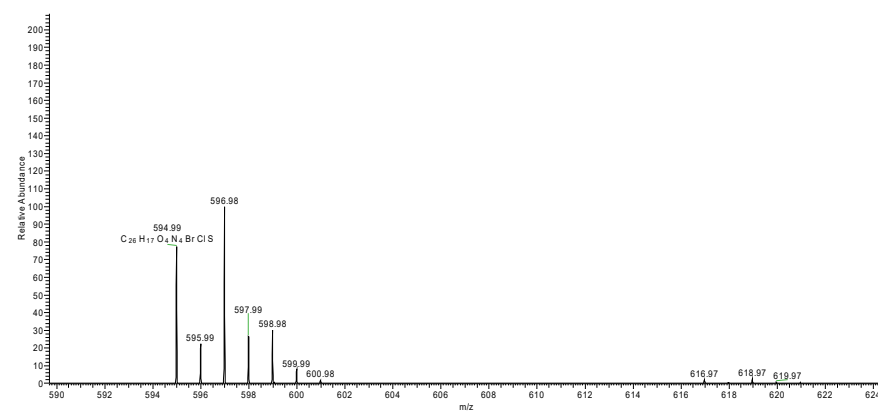

<sup>1</sup>H-NMR: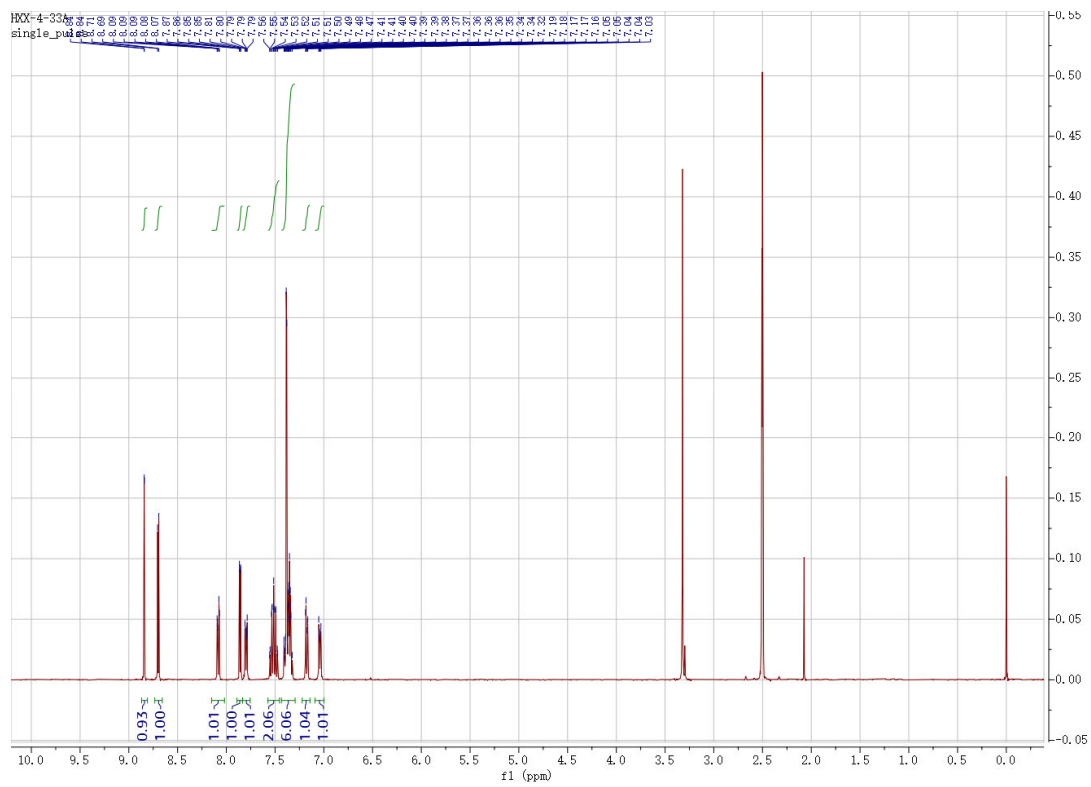<sup>13</sup>C-NMR: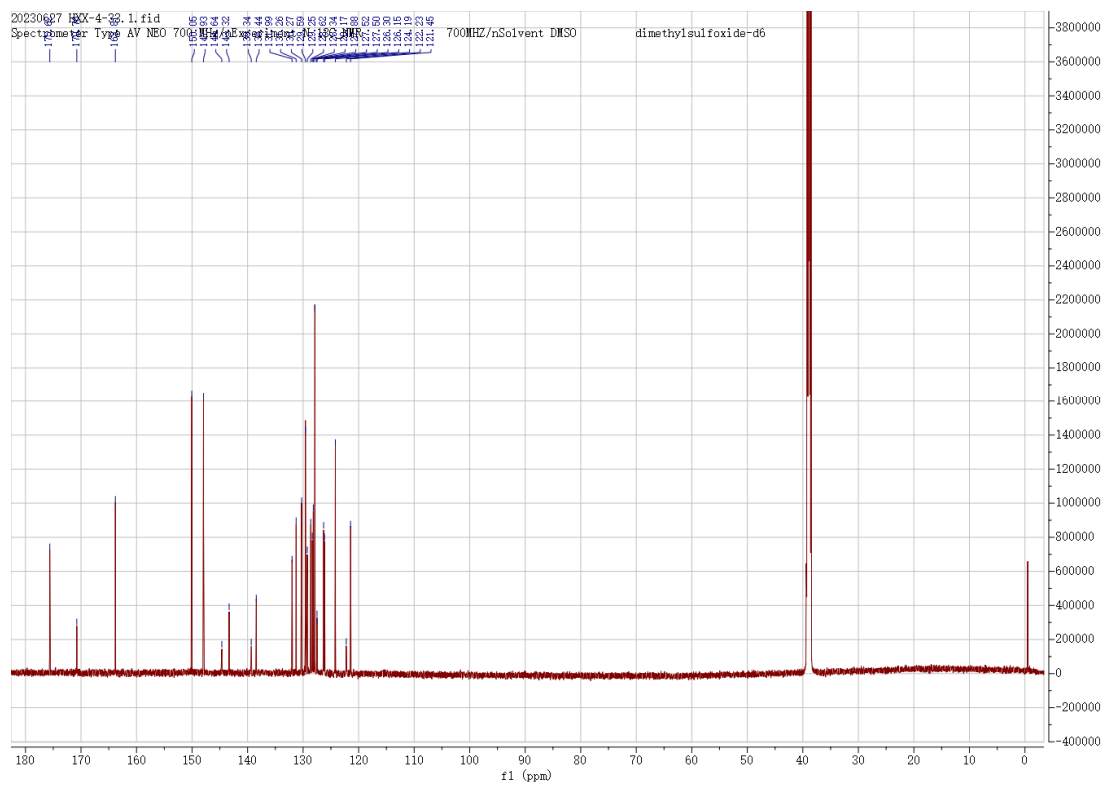

## Compound B28:

### HR-ESI-MS:

HXX-2-7 #48 RT: 0.31 AV: 1 NL: 2.28E7  
T: FTMS + p ESI Full ms [100.0000-1500.0000]

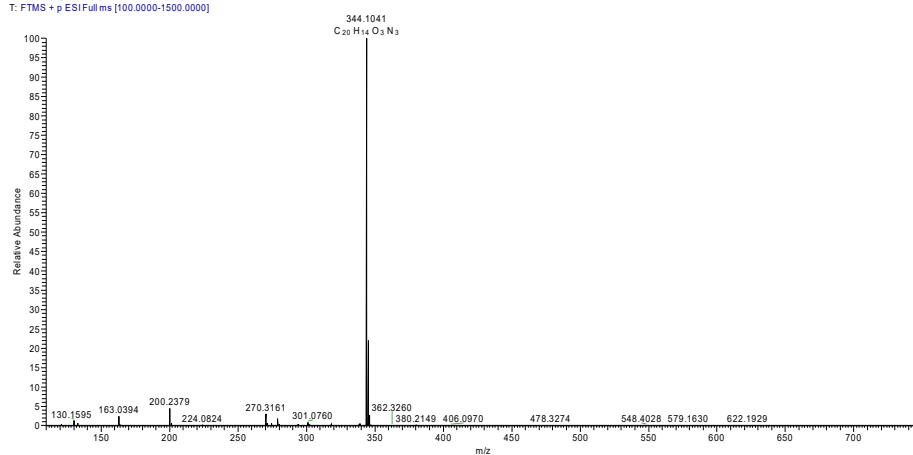

### <sup>1</sup>H-NMR:

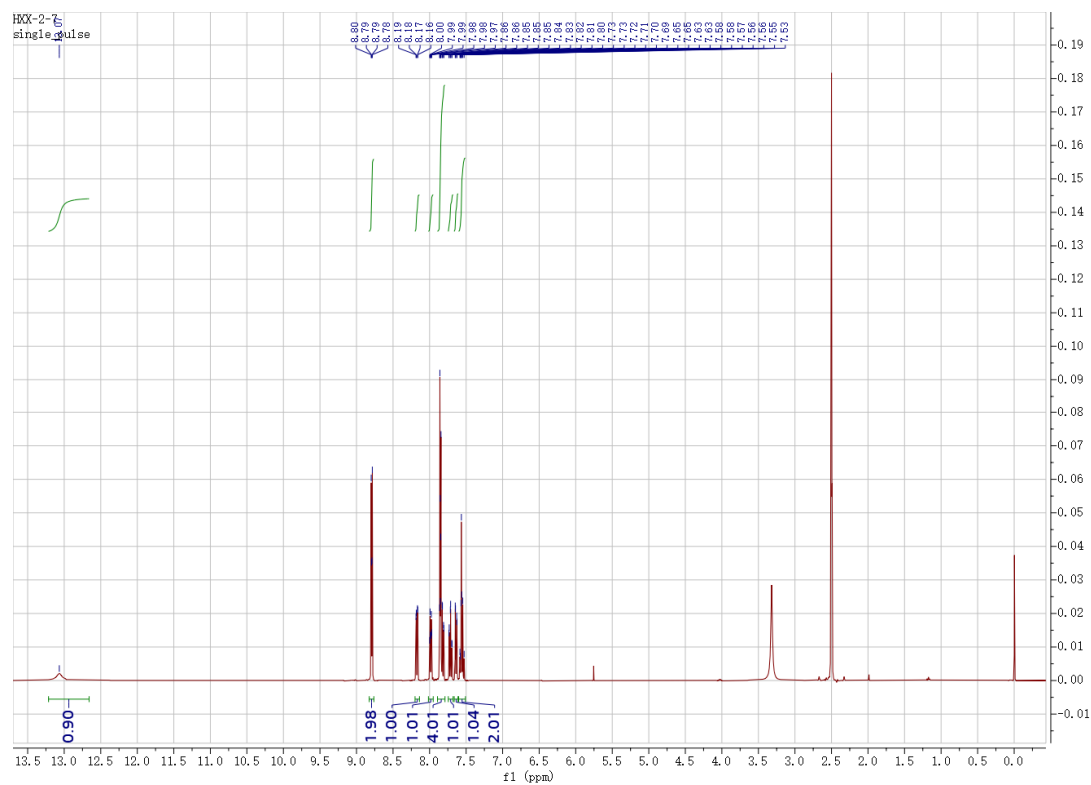

$^{13}\text{C}$ -NMR:

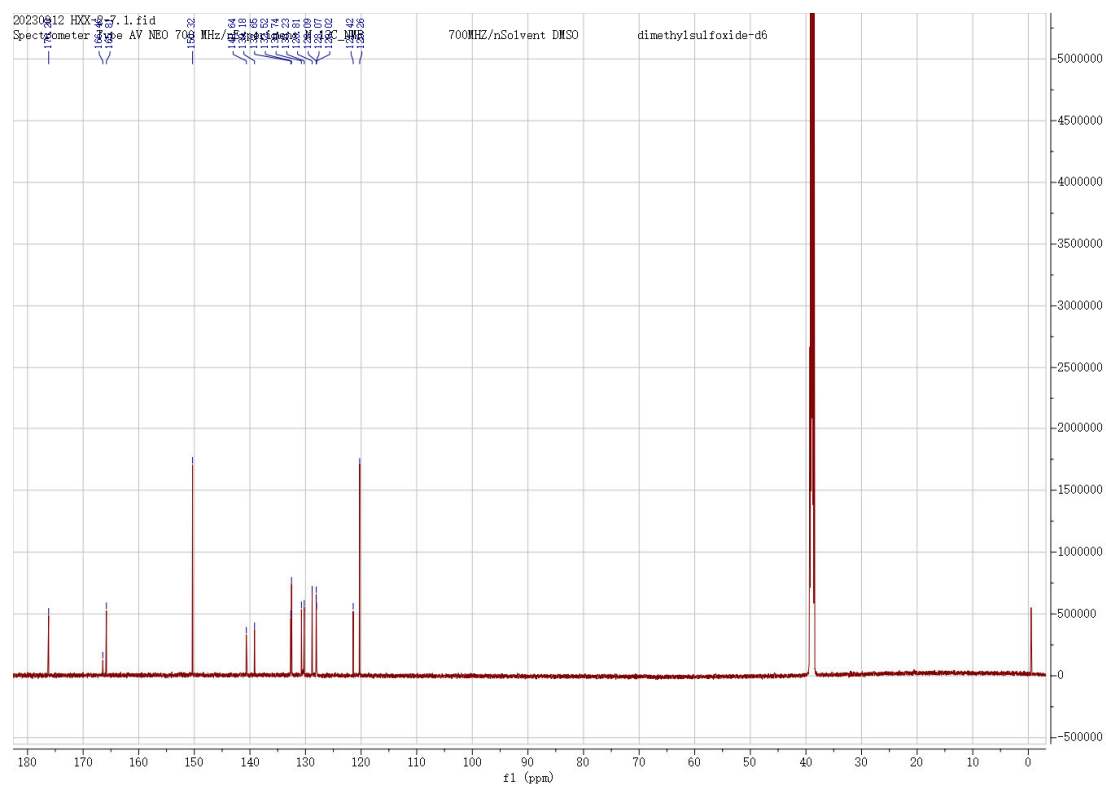

Compound **B29**:

HR-ESI-MS:

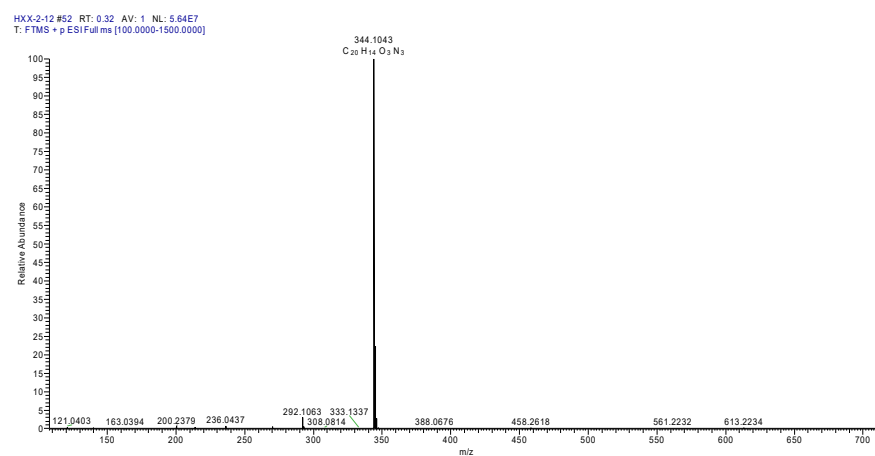

# <sup>1</sup>H-NMR:

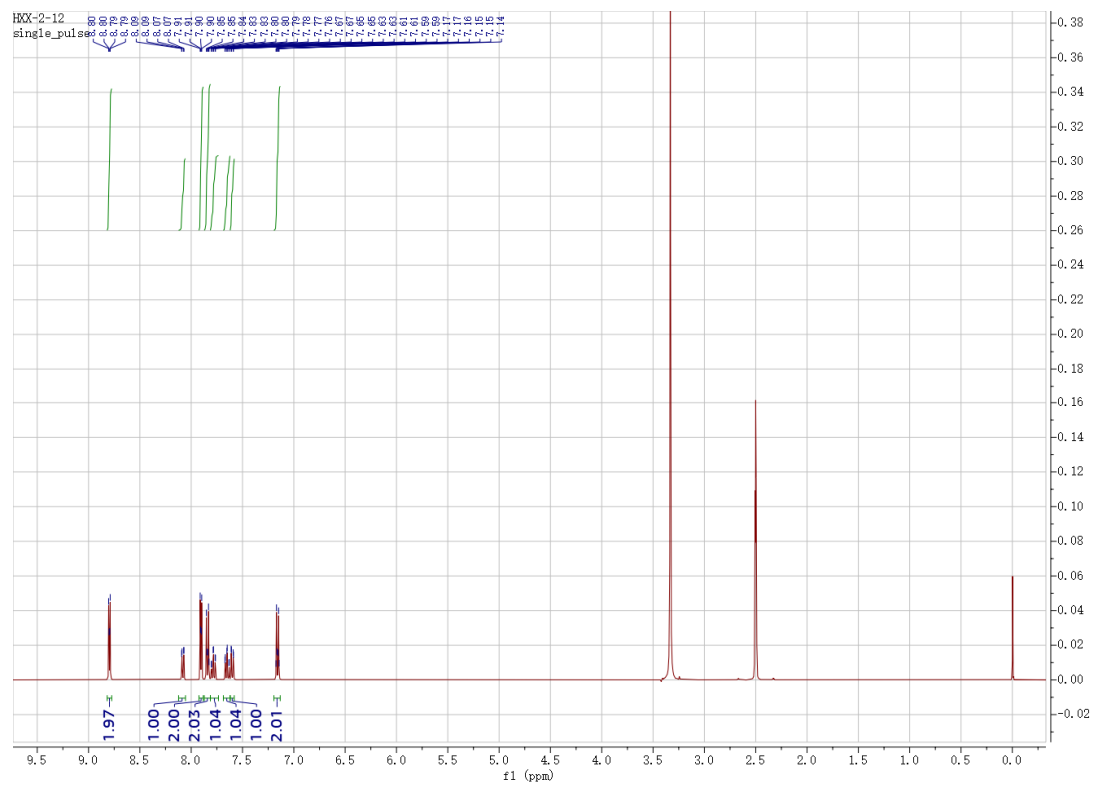

# <sup>13</sup>C-NMR:

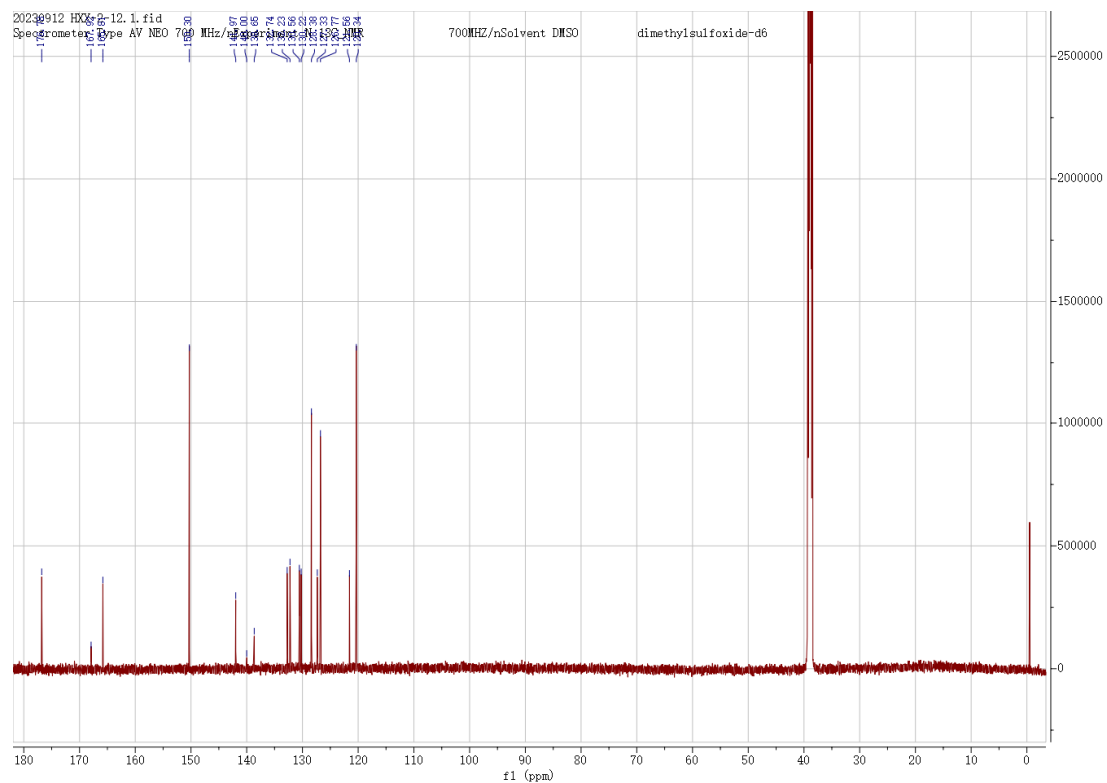

## Compound B30:

### HR-ESI-MS:

HXX-7-16P #973 RT: 3.54 AV: 1 NL: 1.70E9  
T: FTMS + c ESI Full ms [100.0000-1500.0000]

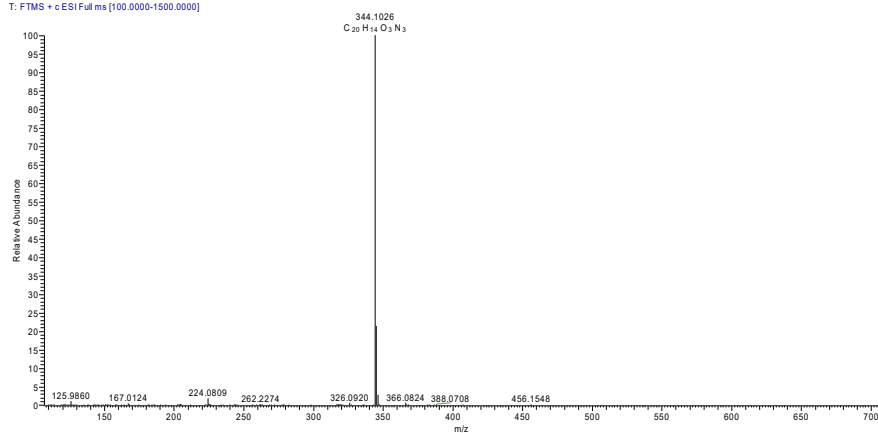

### <sup>1</sup>H-NMR:

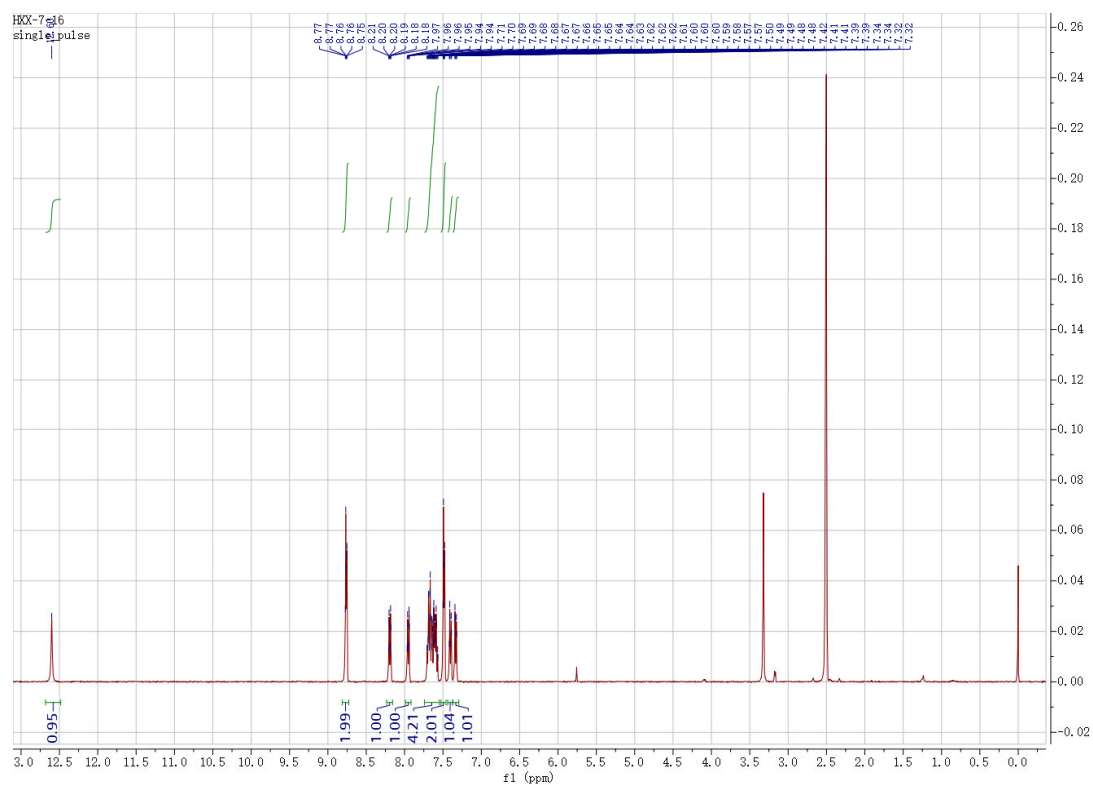



# $^{13}\text{C}$ -NMR:

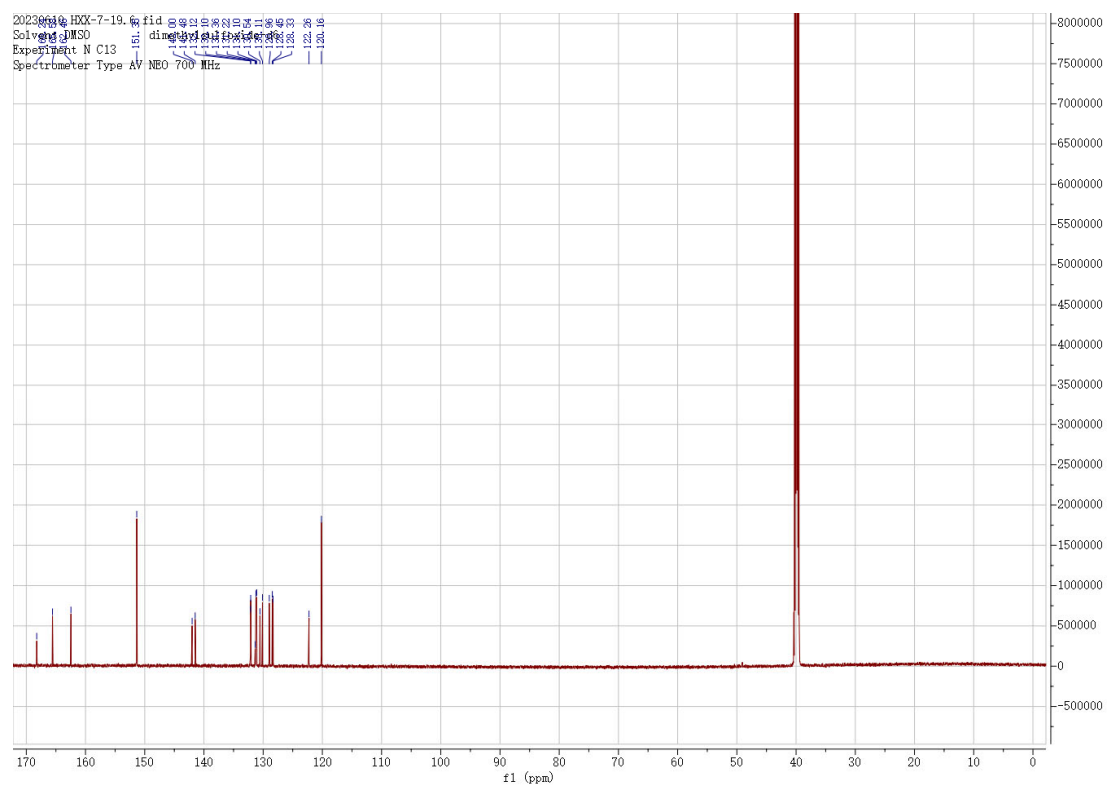

IC<sub>50</sub> curves for all the target compounds are provided herein.

### Benzbromarone

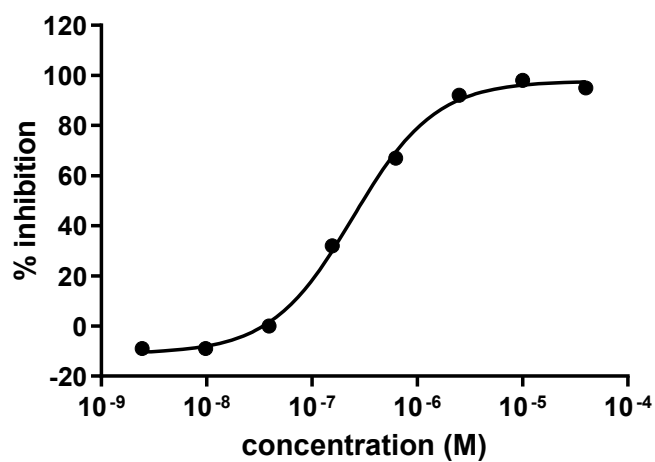

### Benzbromarone

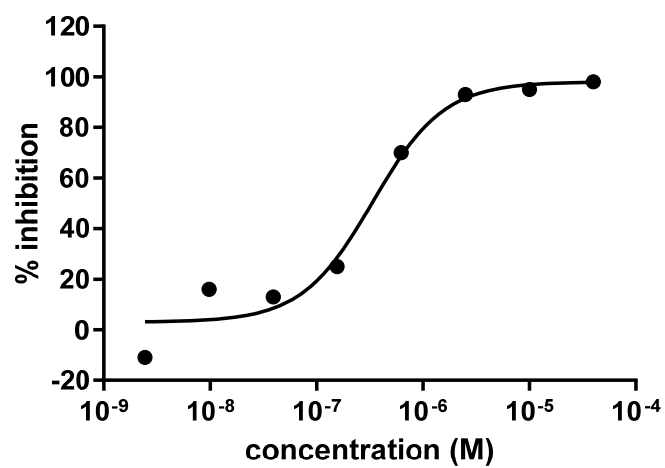

**Benzbromarone**

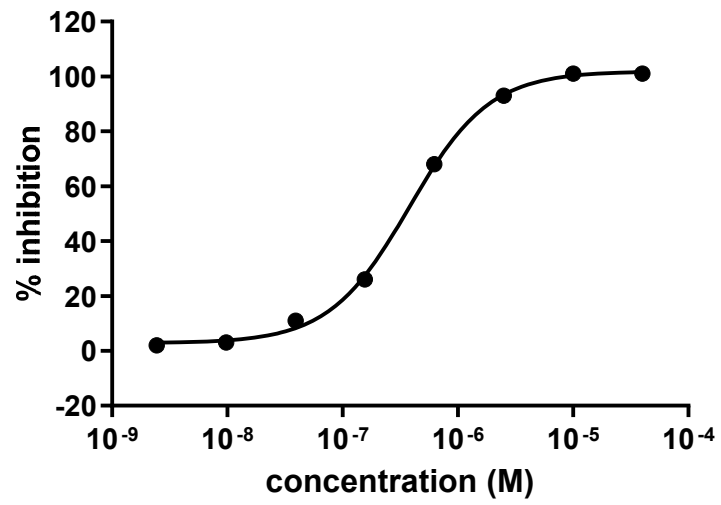

**Compound A1**

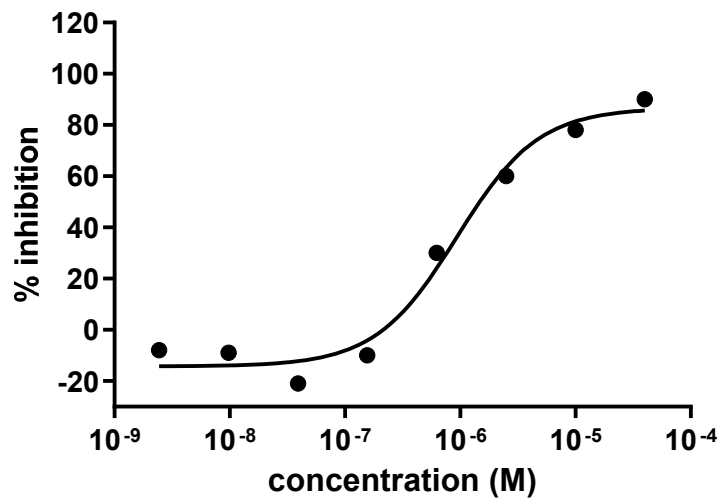

**Compound A2**

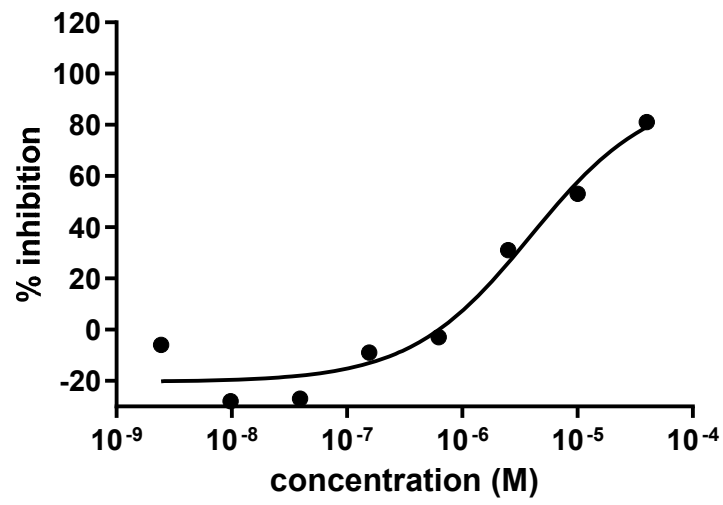

**Compound A4**

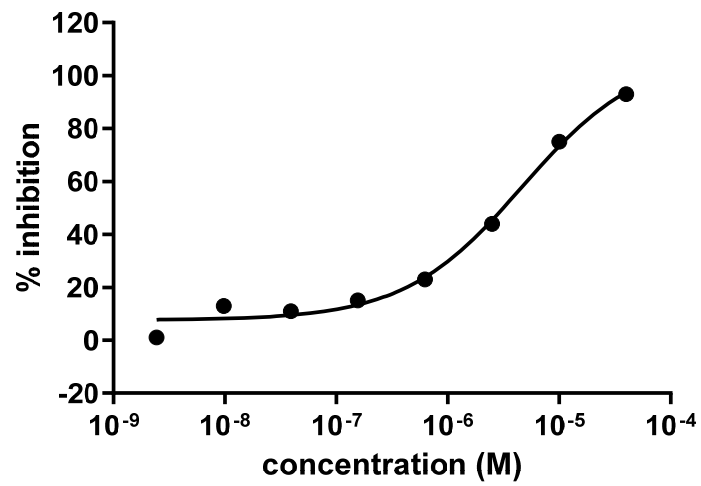

**Compound A6**

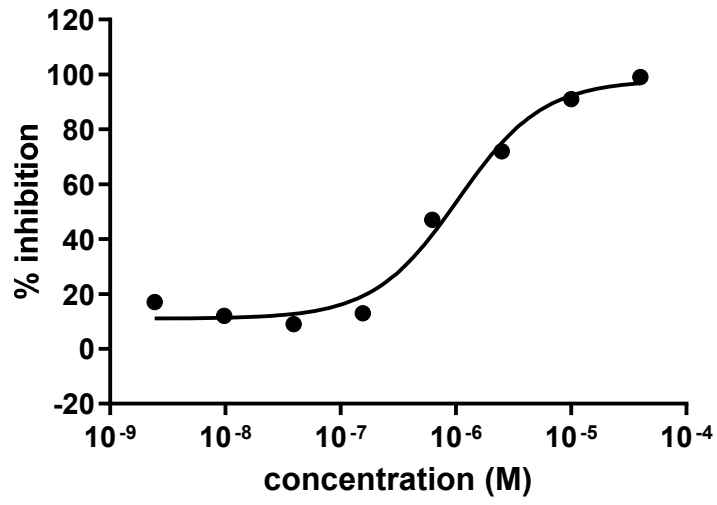

**Compound A7**

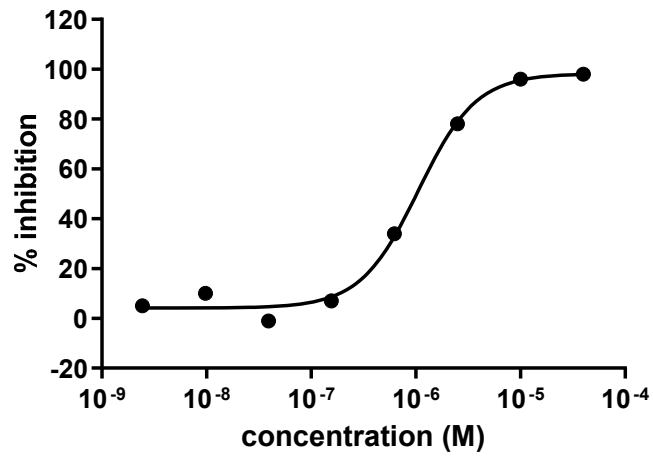

**Compound A8**

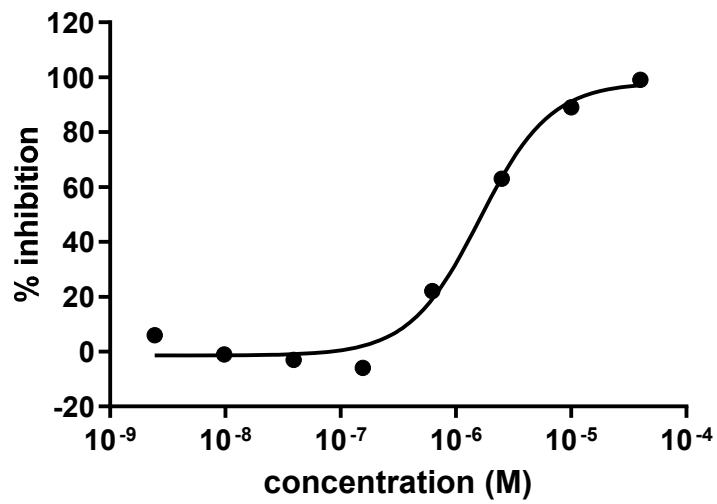

**Compound A9**

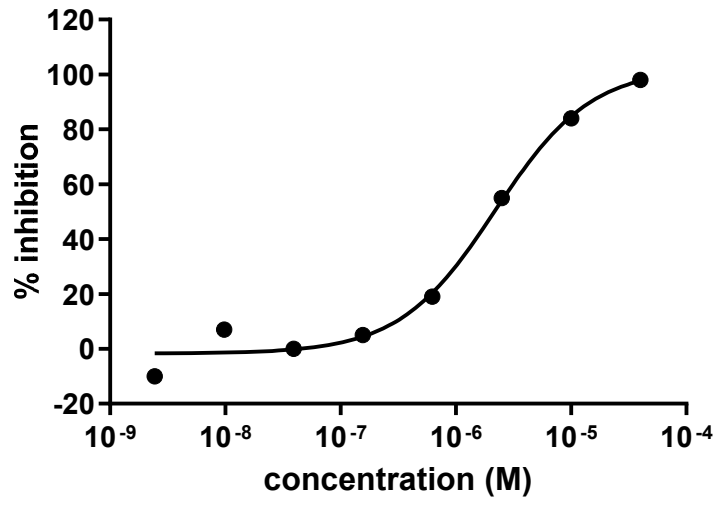

**Compound A10**

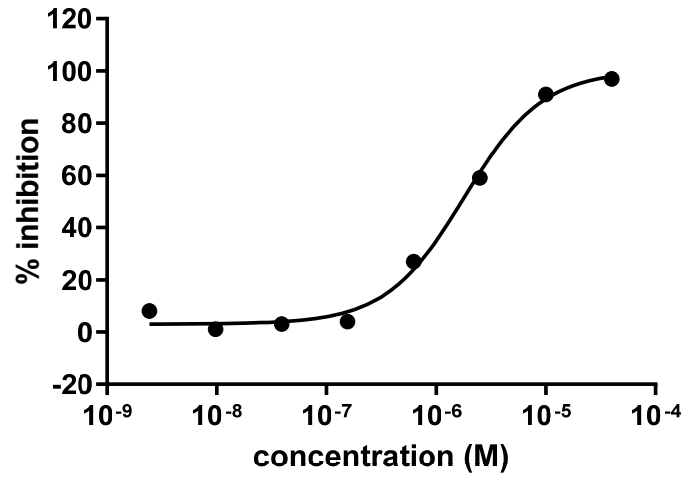

**Compound A11**

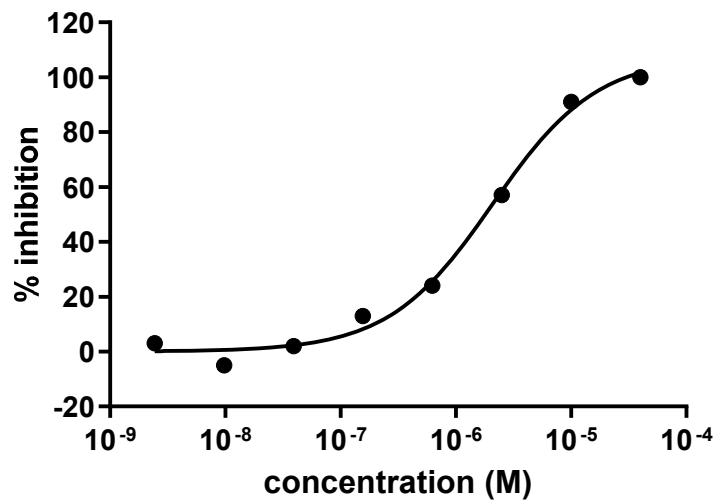

**Compound A13**

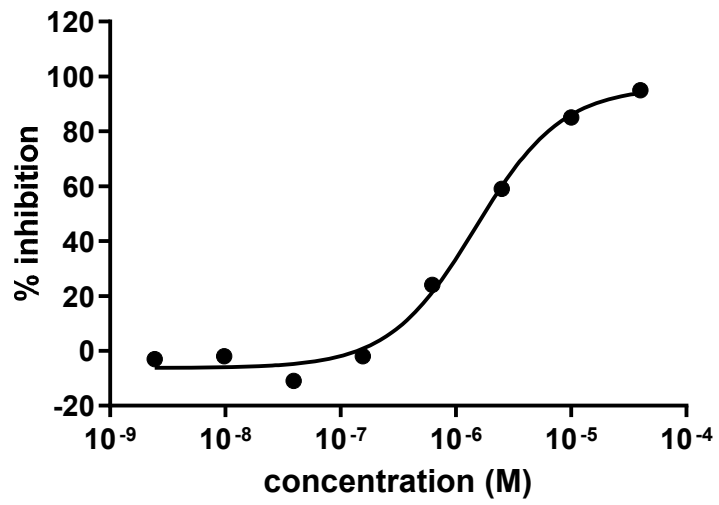

**Compound B14**

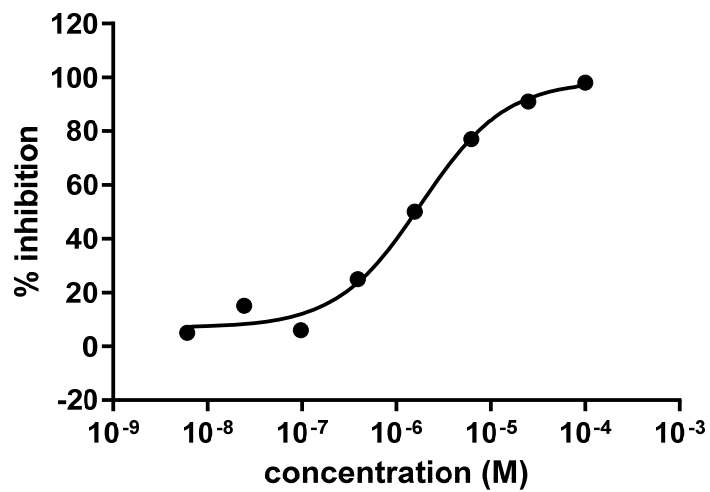

**Compound B15**

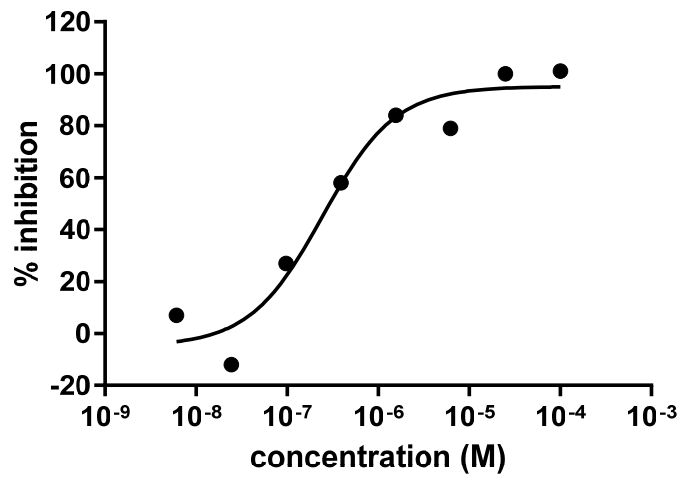

**Compound B16**

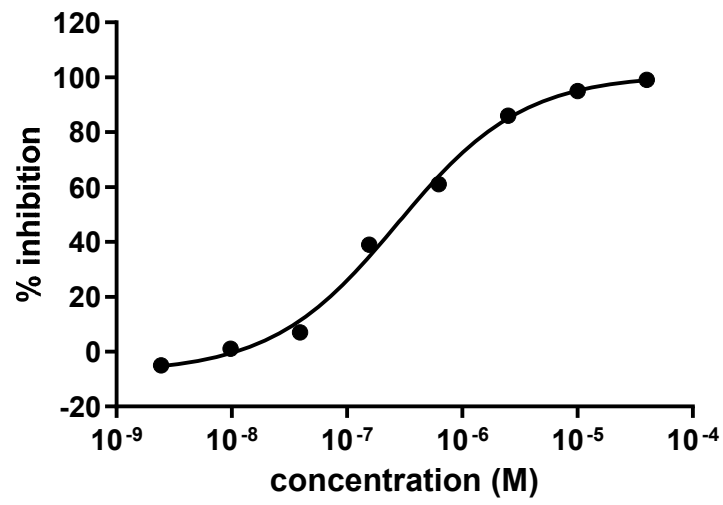

**Compound B17**

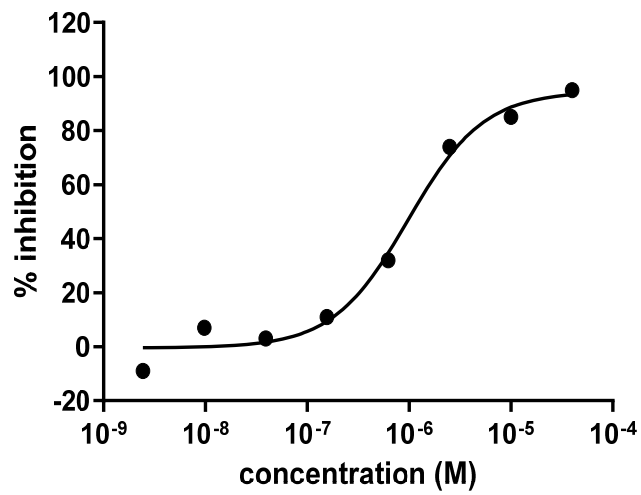

**Compound B18**

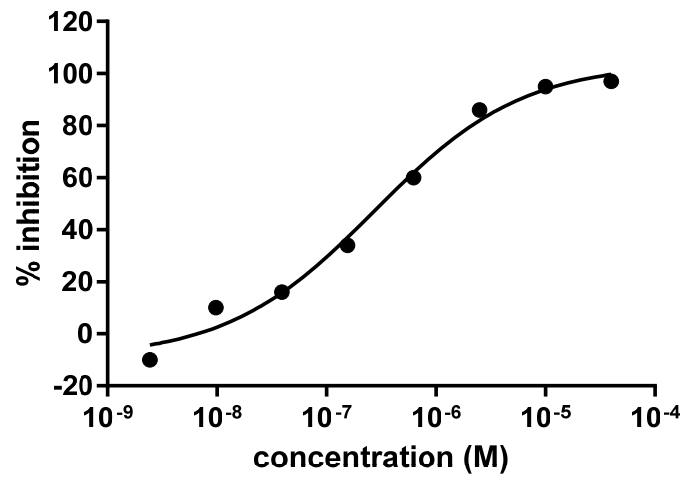



**Compound B19**

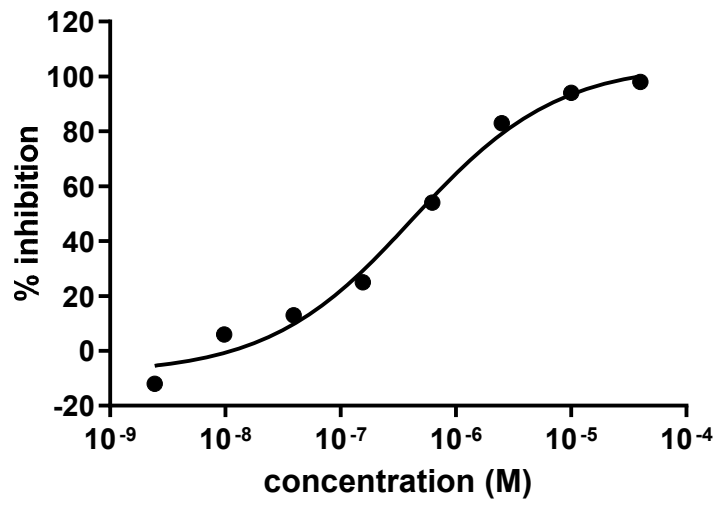

**Compound B20**

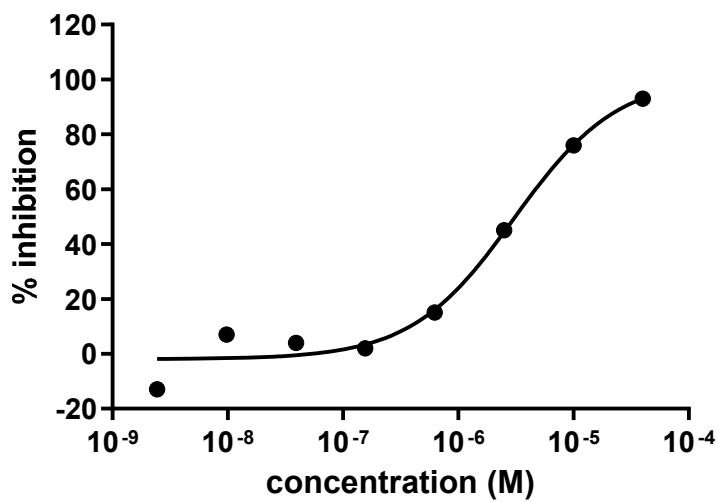

**Compound B21**

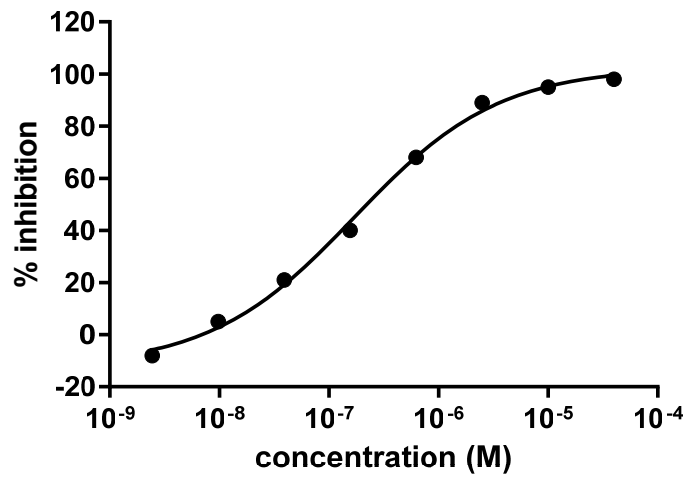

**Compound B22**

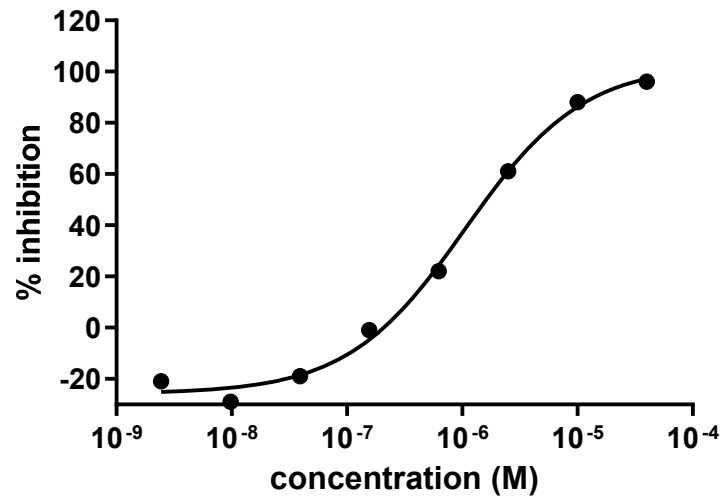

**Compound B23**

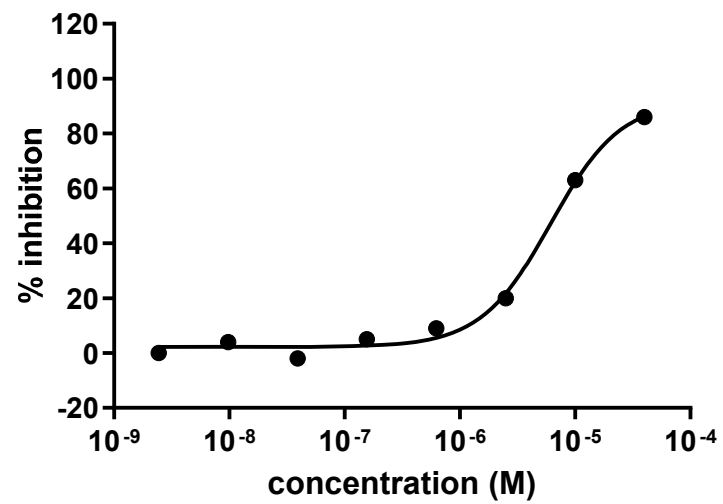

**Compound B27**

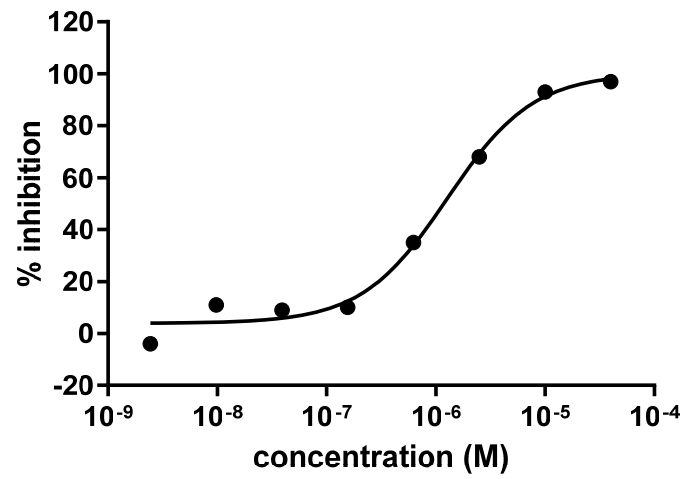

Supplement: s1 [file s1]
